# Supplementary material for: Prevalence and correlates of alcohol and tobacco use among key populations in Togo in 2017: a cross-sectional study
Source: PubMed Central journal article supplement — BMJ Open. 2019 Nov 3;9(11):e028934. doi: 10.1136/bmjopen-2019-028934 (PMC6858156; doi:10.1136/bmjopen-2019-028934), 2019-11-03
Supplement: bmjopen-2019-028934.draft_revisions.pdf [file bmjopen-2019-028934.draft_revisions.pdf]

# BMJ Open

BMJ Open is committed to open peer review. As part of this commitment we make the peer review history of every article we publish publicly available.

When an article is published we post the peer reviewers' comments and the authors' responses online. We also post the versions of the paper that were used during peer review. These are the versions that the peer review comments apply to.

The versions of the paper that follow are the versions that were submitted during the peer review process. They are not the versions of record or the final published versions. They should not be cited or distributed as the published version of this manuscript.

BMJ Open is an open access journal and the full, final, typeset and author-corrected version of record of the manuscript is available on our site with no access controls, subscription charges or pay-per-view fees (<http://bmjopen.bmj.com>).

If you have any questions on BMJ Open's open peer review process please email [info.bmjopen@bmj.com](mailto:info.bmjopen@bmj.com)

# BMJ Open

## ALCOHOL AND TOBACCO CONSUMPTION AMONG KEY POPULATIONS IN TOGO, 2017

|                               |                                                                                                                                                                                                                                                                                                                                                                                                                                                                                                                                                                                                                                                                                                                                                                                                                                                                                                                                                                                                                                                                                                                                                                                                                                                                                                                                                                                                                 |
|-------------------------------|-----------------------------------------------------------------------------------------------------------------------------------------------------------------------------------------------------------------------------------------------------------------------------------------------------------------------------------------------------------------------------------------------------------------------------------------------------------------------------------------------------------------------------------------------------------------------------------------------------------------------------------------------------------------------------------------------------------------------------------------------------------------------------------------------------------------------------------------------------------------------------------------------------------------------------------------------------------------------------------------------------------------------------------------------------------------------------------------------------------------------------------------------------------------------------------------------------------------------------------------------------------------------------------------------------------------------------------------------------------------------------------------------------------------|
| Journal:                      | <i>BMJ Open</i>                                                                                                                                                                                                                                                                                                                                                                                                                                                                                                                                                                                                                                                                                                                                                                                                                                                                                                                                                                                                                                                                                                                                                                                                                                                                                                                                                                                                 |
| Manuscript ID                 | bmjopen-2019-028934                                                                                                                                                                                                                                                                                                                                                                                                                                                                                                                                                                                                                                                                                                                                                                                                                                                                                                                                                                                                                                                                                                                                                                                                                                                                                                                                                                                             |
| Article Type:                 | Research                                                                                                                                                                                                                                                                                                                                                                                                                                                                                                                                                                                                                                                                                                                                                                                                                                                                                                                                                                                                                                                                                                                                                                                                                                                                                                                                                                                                        |
| Date Submitted by the Author: | 18-Jan-2019                                                                                                                                                                                                                                                                                                                                                                                                                                                                                                                                                                                                                                                                                                                                                                                                                                                                                                                                                                                                                                                                                                                                                                                                                                                                                                                                                                                                     |
| Complete List of Authors:     | <p>Bitty-Anderson, Alexandra; PACCI Research Center - Site ANRS Côte d'Ivoire<br/>           GBEASOR-KOMLANVI, Fifonsi Adjidossi; Universite de Lome Faculte des Sciences de la Sante; Centre Africain de Recherches en Epidemiologie et en Santé Publique (CARESP)<br/>           Johnson, Pascal; Centre Africain de Recherches en Epidemiologie et en Santé Publique (CARESP)<br/>           Sewu, Essèboè; Centre Africain de Recherches en Epidemiologie et en Santé Publique (CARESP)<br/>           Dagnra, Claver; Universite de Lomé Laboratoire de Biologie Moléculaire<br/>           Salou, Mounerou; Universite de Lomé Laboratoire de Biologie Moléculaire<br/>           Blatome, Tetouyaba; Centre Africain de Recherches en Epidemiologie et en Santé Publique (CARESP)<br/>           Jaquet, Antoine; INSERM U1219 Bordeaux Population Health Research Université de Bordeaux; Université de Bordeaux Institut de Santé Publique Epidémiologie et Développement<br/>           Coffie, Patrick; Université de Bordeaux Institut de Santé Publique Epidémiologie et Développement; Université Felix Houphouet-Boigny<br/>           Unite de Formation et de Recherche des Sciences Medicales, Dermatologie et Infectiologie<br/>           Ekouevi, Didier; Universite de Lome Faculte des Sciences de la Sante; INSERM U1219 Bordeaux Population Health Research Université de Bordeaux</p> |
| Keywords:                     | EPIDEMIOLOGY, HIV & AIDS < INFECTIOUS DISEASES, Public health < INFECTIOUS DISEASES, Substance misuse < PSYCHIATRY                                                                                                                                                                                                                                                                                                                                                                                                                                                                                                                                                                                                                                                                                                                                                                                                                                                                                                                                                                                                                                                                                                                                                                                                                                                                                              |
|                               |                                                                                                                                                                                                                                                                                                                                                                                                                                                                                                                                                                                                                                                                                                                                                                                                                                                                                                                                                                                                                                                                                                                                                                                                                                                                                                                                                                                                                 |

SCHOLARONE™  
Manuscripts

1  
2  
3 **ALCOHOL AND TOBACCO CONSUMPTION AMONG KEY POPULATIONS IN TOGO IN**  
4 **2017: A CROSS-SECTIONAL STUDY**  
5  
6  
7

8 Alexandra M BITTY-ANDERSON<sup>1</sup>, Fifonsi A GBEASOR-KOMLANVI<sup>2,3</sup>, Pascal JOHNSON<sup>3</sup>  
9 Essèboè K SEWU<sup>3</sup>, Claver A DAGNRA<sup>4</sup>, Mounerou SALOU<sup>4</sup>, Tetouyaba J BLATOME<sup>3</sup>, Antoine  
10 JAQUET<sup>5,6</sup>, Patrick A COFFIE<sup>6,7,8</sup>, Didier K EKOUEVI<sup>1,2,3,5,6</sup> §  
11  
12  
13  
14

- 15 1. Programme PACCI – Site ANRS Côte d’Ivoire, CHU de Treichville, Abidjan, Côte d’Ivoire
- 16
- 17
- 18 2. Université de Lomé, Faculté des Sciences de la Santé, Département de Santé Publique, Lomé, Togo
- 19
- 20
- 21 3. Centre Africain de Recherches en Epidémiologie et en Santé Publique (CARESP), Lomé, Togo
- 22
- 23
- 24 4. Université de Lomé, Laboratoire de Biologie Moléculaire, Département des Sciences
- 25 Fondamentales, Lomé, Togo
- 26
- 27
- 28
- 29 5. INSERM U1219 Bordeaux Population Health Research, ISPED, Université de Bordeaux, Bordeaux,
- 30 France
- 31
- 32
- 33 6. Université de Bordeaux, Institut de Santé Publique Epidémiologie Développement (ISPED),
- 34 Bordeaux, France
- 35
- 36
- 37 7. Université Félix Houphouët Boigny, Département de Dermatologie et d’Infectiologie, UFR des
- 38 Sciences Médicales, Abidjan, Côte d’Ivoire
- 39
- 40
- 41
- 42 8. CHU de Treichville, Service de maladies infectieuses et tropicales, Abidjan, Côte d’Ivoire
- 43
- 44
- 45
- 46
- 47

48 **\*Word Count** (excluding title page, abstract, references, figures and tables): 3,214

49 **§ Corresponding Author:**

50 Didier Koumavi EKOUEVI, MD, PhD

51 Université de Lomé (Togo)

52 Faculté des Sciences de la Santé

53 Département de Santé Publique

54 Cell: +228 99 68 67 35

55 Email: [didier.ekouevi@gmail.com](mailto:didier.ekouevi@gmail.com)  
56  
57  
58  
59  
60

## Abstract

### Objectives

The aim of this study was to assess the determinants of alcohol and tobacco consumption among males who have sex with males (MSM), female sex workers (FSW) and drug users (DU) in Togo.

### Design, setting and participants

A cross-sectional bio-behavioral study was conducted among 2,115 MSM, FSW and DU in 2017 using a respondent-driven sampling (RDS) method, in the eight biggest towns of Togo. Selection criteria for the MSM were being male and having had oral or anal intercourse with a man in the previous 12 months; for FSW, being a female and having exchanged sex for money in the previous 12 months; and for DU, consuming heroin, cocaine or hashish for MSM, FSW and DU, respectively. All participants had to be at least 18 years old and residing in the territory for the past three months.

### Results

The prevalence of alcohol consumption, hazardous/harmful consumption and binge drinking was 64.8%, 38.4%, and 45.5%, respectively. Current tobacco use was reported by 30.6% of participants and HIV prevalence was estimated at 12.5%. DU (female and male DU) were more likely to engage in binge drinking compared to other key populations (aOR=2.9; 95% CI = [1.2-7.9]; p= 0.05 and aOR=2.0; 95% CI= [1.4-2.8]; p=0.001, respectively). Participants who were identified as having hazardous/harmful alcohol consumption had almost three times the odds of tobacco consumption than those with no risky consumption (aOR=2.6; 95% CI= [2.0-3.4]; p=0.001). Hazardous/harmful alcohol consumption was three times more likely among participants with severe psychological distress compared to those with no psychological distress (aOR= 3.3, 95% CI= [2.2 – 5.1]; p=0.001).

### Conclusions

Findings from this study demonstrate the need for the integration of mental health and substance abuse reduction interventions into HIV prevention programs, particularly those geared toward key populations.

**Key words:** Alcohol, tobacco, HIV, key populations, Sub-Saharan Africa.

### Strengths and limitations of this study

- This study is among the first in sub-Saharan Africa exploring the patterns of alcohol and tobacco consumption among the three main groups of key populations
- This study had a consistent sample size
- The use of internationally validated instruments to assess alcohol and tobacco consumption, as well as psychological distress minimized bias
- The main limitation of our study is that it was based on self-reported data which could be a potential source of recall bias or social desirability bias

For peer review only

## Introduction

Sub-Saharan Africa (SSA) is the region of the World the most affected by the HIV/AIDS epidemic: with only 12% of the global population, SSA accounts for an estimated 71% of the world's burden of HIV infection and 74% of world's AIDS-related deaths (1). In West and Central Africa, the HIV epidemic is described as generalized and driven by heterosexual sex with an estimated prevalence of 2.2% (2). However, in key populations, populations at higher risk of HIV such as sex workers, men who have sex with men (MSM) and injection drug users, the reported prevalence rates are disproportionately high compared to those of the general population (3,4). In Togo, HIV prevalence among key populations ranges from 11% to 13% compared to 2.1% in the general population (5). Several biological, behavioral and structural risk factors are associated with this high HIV rate among key populations: unprotected sex, presence of other Sexually Transmitted Infections (STIs), lack of access to condoms, multiple concurrent sex partners (males and females for MSM), lack of access to health care and prevention services, physical and sexual violence, challenging legal and sociopolitical environment, poverty, sociopolitical stigma and discrimination (3,4).

Other risk factors associated with sexual risk behaviors and thus contributing to HIV transmission include alcohol and tobacco consumption. Alcohol, a psychoactive substance with dependence-producing properties, has been an integral part of many cultures for several centuries (6). The harmful use of alcohol and its consequences make its consumption a public health problem. More than 200 disease and injury conditions including alcohol dependence, liver cirrhosis, cancers and injuries are the consequences of the harmful use of alcohol (6). In 2012, it was reported that 5.9% of all global deaths and 5.1% of the global burden of disease and injury were the consequences of harmful alcohol consumption (6). Recent research studies have also uncovered a causal relationship between the harmful use of alcohol and infectious diseases, including HIV (6–8). This relation could be attributed to the fact that alcohol influences cognitive abilities and decision making, and affects condom negotiation and correct condom use (9). Among key populations, particularly sex workers, alcohol consumption is seen as a sexual enhancer and work requirement which in many cases leads to an increased likelihood of unprotected sex, economic loss, interference with family responsibilities and sexual violence (8,10,11).

Tobacco consumption is also one of the biggest public health challenges of the 21<sup>st</sup> century, with a clear, causal link between tobacco use and health. It is estimated that tobacco use kills half of its users and is responsible for the death of more than 7 million people a year. Approximately 80% of tobacco users live in low and middle income countries (12). Tobacco use is one the main risk factors for lung cancer, disability and death from non-communicable chronic diseases, and also an increased risk of death from communicable diseases (13,14). For people living with HIV, tobacco use is a risk factor for HIV-related comorbidities and premature death (15). Estimates in Togo put the prevalence of alcohol and tobacco consumption at 53.7% and 8.5% respectively, in the general population (16).

1  
2  
3  
4 Both alcohol and tobacco consumption play an important role in the HIV epidemic in SSA. With key  
5 populations being an important catalyst of the HIV epidemic in SSA and particularly in West Africa, it  
6 is important that patterns of alcohol and tobacco consumption be explored among these populations.  
7  
8 However, there is a dearth of data on the consumption of addictive substances such as tobacco and  
9 alcohol among the three main key populations in SSA. Of the few studies on key populations completed  
10 in Togo, none has explored alcohol and tobacco consumption and very few studies in West Africa have  
11 explored alcohol and tobacco consumption across the three key populations. The aim of this study was  
12 to identify the determinants of alcohol and tobacco consumption among female sex workers (FSW),  
13 MSM and drug users (DU) in Togo.  
14  
15  
16  
17  
18  
19  
20  
21  
22  
23  
24  
25  
26  
27  
28  
29  
30  
31  
32  
33  
34  
35  
36  
37  
38  
39  
40  
41  
42  
43  
44  
45  
46  
47  
48  
49  
50  
51  
52  
53  
54  
55  
56  
57  
58  
59  
60

For peer review only

## Methods

### Study design, sampling and recruitment

This study was a bio-behavioral cross-sectional study conducted from August to September 2017 in eight towns of Togo. Prior to the study, locations (associations and hot spots) specific to each group of key population were identified during preliminary visits with the help of leaders from these communities. DU and FSW were recruited in drug-dealing/consumption locations and brothels (licensed or not), respectively. MSM were recruited using a Respondent Driven Sampling (RDS) method. MSM community leaders were the first “seeds”. A total of 28 seeds were identified at first based on their roles in their community and on their representativeness. Each seed from the first wave selected had to represent at least one sub-group: passives, actives, bisexuals, gays, etc. Each participant was then given three coupons with a unique identification code to recruit three other seeds in their network until the required sample size for each group was reached. Inclusion criteria for the three groups were being 18 years or older, living/working/studying in Togo for a minimum of 3 months at the time of the study, and being in possession of a recruitment coupon. In addition to these criteria, criteria specific to MSM were having had anal sex with a man in the previous 12 months, for FSW having had sex in exchange for money as a compensation in the previous 12 months and for DU, consuming heroin, cocaine or hashish at the time of the study.

### Sample size estimation

With an estimated prevalence of hazardous alcohol drinking among key populations of 9.1% (17), and with a precision of 3% and an assumption of 10% of missing data, the minimum sample size was estimated at 423 participants. Thus, to allow a comparison between groups, the total sample size estimated for the three groups of key populations was 1,269.

### Study procedures

After eligibility screening and informed consent approval, trained study staff administered a structured and standardized questionnaire during a face-to-face interview. The questionnaire was constructed based on validated tools such as the Alcohol Use Disorders Identification Test (AUDIT) (18) and a subset of the Tobacco Questions for Surveys (19) to assess alcohol and tobacco consumption respectively. The Kessler Psychological Distress Scale (K10) (20) was used to measure psychological distress and the Family Health International (FHI) 360 validated guide for bio-behavioral surveys (21) was adapted to collect information on socio-demographic characteristics, risky sexual behaviors, STIs, HIV prevention methods, HIV testing history, access to health care services, and HIV knowledge. The questionnaires were used across the three populations with slight adaptations depending on the population.

### Scores and operational definitions



1  
2  
3 The AUDIT was used to assess alcohol consumption. The AUDIT is a set of 10-item standardized  
4 screening instrument measuring self-reported alcohol use in the past 12 months, alcohol dependence  
5 symptoms, and alcohol-related problems to screen for excessive drinking. Each question of the AUDIT  
6 can obtain a score from zero (0) to four (4). A score  $\geq 8$  for men and  $\geq 7$  for women indicates  
7 hazardous/harmful drinking, while a score of 0 indicates a non-drinker; moderate alcohol use lies in-  
8 between (17,21-23). Binge drinking or heavy episodic drinking was defined as the consumption of six  
9 or more alcohol drinks on at least one occasion in the past 30 days (third item of the AUDIT) (18).

10  
11 Tobacco use was assessed using six questions indicating participants' smoking habits, frequency of  
12 smoking, history of smoking, type of products smoked and attempts at stopping to smoke.

13  
14 The Kessler Psychological Distress Scale (K10) was used to measure psychological distress. This scale  
15 has been examined and validated among several populations and aims at measuring anxiety and  
16 depression with a 10-item questionnaire, each question pertaining to an emotional state and a five-level  
17 response scale for each response. The score obtained from the scale allows to categorize participants  
18 into four categories of psychological distress: severe (score  $\geq 30$ ), moderate (score: 25-29), mild (score:  
19 20-24) and none (score  $< 20$ ) (24).

### 20 21 22 23 24 25 26 27 28 29 **Laboratory testing**

30 Blood samples were collected to test for HIV and Syphilis using SD Bioline Duo® (Abbott, Santa Clara,  
31 CA, USA). Each HIV positive test was confirmed with another HIV rapid test, the First Response® HIV  
32 1-2-O Card Test (Premier Medical Corporation Pvt. Ltd., Maharashtra, India). In case of discordant  
33 results, samples were tested with the INNO-LIA® HIV I/II Score (20T) (Fujirebio, Göteborg, Sweden)  
34 line immunoassay. All biological tests analyses were completed in the main HIV laboratory research  
35 unit, the Molecular Biology Laboratory (BIOLIM) at the University of Lomé.

### 36 37 38 39 40 41 42 **Statistical analysis**

43 Descriptive statistics were performed and results were presented with frequency tabulations and  
44 percentages. Prevalences were estimated with their 95% confidence interval (95%CI). Univariate and  
45 multivariate logistic regression were performed to identify factors associated with: i) hazardous/harmful  
46 alcohol consumption, ii) binge drinking and iii) current tobacco consumption. For model building,  
47 characteristics that had a p-value  $< 0.20$  in univariate analysis were considered for the full multivariate  
48 models, which were then finalized using a stepwise, backward elimination approach. The three models  
49 did not include the variable "sex" as the four groups were already categorized according to sex. All  
50 analyses were performed using R® software.

### 51 52 53 54 55 56 57 **Ethical consideration**

58 This study was approved by the "Comité de Bioéthique pour la Recherche en Santé (CBRS)" (Bioethics  
59 Committee for Health Research) from the Togo Ministry of Health. Participants provided written  
60

1  
2  
3 consent prior to participation. Potential participants were told about the study purpose and procedures,  
4 potential risks and protections, and compensation. Informed consent was documented with signed  
5 consent forms.  
6  
7  
8

### 9 **Patient and Public Involvement**

10 Members of key populations were involved during the study design and data collection phases of the  
11 study. They were consulted prior to the study for their input on the best method to reach out to key  
12 populations and they were actively involved in the recruitment process.  
13  
14  
15

## 16 **Results**

### 17 **Socio-demographic characteristics**

18 A total of 641 MSM, 537 DU and 937 FSW, with a median age of 25 years, interquartile range (IQR)  
19 [21-32 years] participated in the study. The majority of the sample (n=1,443; 54.0%) had a secondary  
20 school education level and 76.7% were Christians (n=1,621). Approximately two-thirds of the sample  
21 (n=1,278; 60.4%) were likely to not have any psychological distress and 6.5% (n=136) were identified  
22 as having severe psychological distress, the highest among female-DU (n=9; 33.4%). The HIV  
23 prevalence was 12.5% across the three populations, with the highest prevalence among MSM (20.4%).  
24 Other socio-demographic characteristics are summarized in Table 1.  
25  
26  
27  
28  
29  
30  
31  
32

### 33 **Alcohol and tobacco consumption**

34 Alcohol and tobacco consumption patterns are presented in Table 2. Overall, the prevalence of alcohol  
35 consumption among the three groups was 64.8%. Most participants were identified as having a  
36 hazardous/harmful alcohol consumption (n=813; 38.4%), with the highest proportion among DU (74.1%  
37 among female-DU and 61.7% among male-DU; 36.7% among FSW; and 20.9% among MSM; p  
38 <0.001). More than a quarter of FSW (n=275; 29.4%) were moderate drinkers. The MSM subgroup had  
39 the highest proportion of non-drinkers (n=338; 52.7%), followed by FSW (n=318; 33.9%). The overall  
40 prevalence of binge drinking was 45.5% (n=962) and was the highest among DU: 80.0 % among female-  
41 DU (n=20) and 80.2% among male-DU (n=340) (Table 2).  
42  
43  
44  
45  
46

47 The prevalence of tobacco consumption was 30.6% among the three groups. DU had the highest  
48 proportion of smokers with 85.2% of female-DU (n=23) and 80.6% of male-DU (n=411). The highest  
49 proportion of non-smokers were FSW (n=821; 87.6%), followed by MSM (n=544, 84.9%). Of the  
50 people who smoked, 63.1% were smoking every day, including 79.1% of DU (female-DU: n=16; 69.6%,  
51 male-DU: n=327; 79.6%), 42.2% of FSW and 16.5% of MSM.  
52  
53  
54  
55  
56

### 57 **Alcohol consumption risk factors**

58 Table 3 summarizes the association between the independent variables and the hazardous/harmful  
59 consumption of alcohol and binge drinking. The odds of hazardous/harmful alcohol consumption were  
60

1  
2  
3 significantly higher among non-believers or other (aOR=0.7; 95% CI= [0.5-0.9]; p= 0.001) than among  
4 Muslims (aOR= 0.4; 95% CI [0.3-0.6]; p= 0.001] and Christians (aOR=0.7; 95% CI= [0.5-0.9]; p=  
5 0.001). FSW (aOR=1.6; 95% CI= [1.3-2.1]; p= 0.001), female-DU (aOR=2.9; 95% CI = [1.2-7.9]; p=  
6 0.05) and male-DU (aOR=1.96; 95% CI= [1.40-2.76]; p= 0.001) were more likely to engage in binge  
7 drinking compared to MSM. The place of residence, whether in the capital city of Lomé or in other  
8 towns, was also associated with hazardous/harmful alcohol consumption and binge drinking so that  
9 people living in other towns were almost three times more likely to have hazardous/harmful alcohol  
10 consumption (aOR=2.8; 95% CI= [2.2-3.4]; p=0.001) or engage in binge drinking (aOR=2.5; 95% CI=  
11 [2.0-3.0]; p=0.001) than those living in the capital city of Lomé. Psychological distress was also a risk  
12 factor for hazardous/harmful alcohol consumption and binge drinking. Participants with several  
13 psychological distress were three times (aOR= 3.3, 95% CI= [2.2 – 5.1]; p=0.001) and twice (aOR=2.2,  
14 95% CI= [1.5 – 3.4]; p = 0.001) more likely to be engaged in hazardous/harmful alcohol consumption  
15 and binge drinking, respectively, than those with no psychological distress. The odds of  
16 hazardous/harmful alcohol consumption and binge drinking increased as the severity of psychological  
17 distress increased. In addition, being a DU, particularly a female-DU was significantly associated with  
18 hazardous/harmful alcohol consumption and binge drinking. Compared to MSM and FSW, female-DU  
19 had three times and male-DU had two times the odds of hazardous/harmful alcohol consumption  
20 (aOR=3.8; 95%CI=[1.5 -10.5]; p=0.01 and aOR=2.4; 95%CI= [1.7-3.4]; p=0.001, respectively) and two  
21 times the odds of binge drinking compared to MSM and FSW (aOR=2.9; 95%CI= [1.2-7.9] and  
22 aOR=2.0; 95%CI= [1.4 -2.8]). Finally, being 25 years old and older (aOR=1.3; 95% CI [1.1-1.6]),  
23 tobacco use (aOR=2.6; 95% CI: [2.0-3.4]), being HIV positive (aOR=0.7; 95% CI [0.5-0.9]) were  
24 significantly associated with both hazardous/harmful alcohol consumption and binge drinking.  
25  
26  
27  
28  
29  
30  
31  
32  
33  
34  
35  
36  
37  
38

### 39 **Tobacco use risk factors**

40  
41  
42 Living in cities other than Lomé (the capital city) (aOR=0.6; 95%CI 0.5-0.8), hazardous/harmful  
43 alcohol consumption (aOR=2.6; 95% CI 2.0-3.4), having mild (aOR=1.5; 95% CI 1.1-2.1) or moderate  
44 (aOR=2.0; 95% CI 1.3-2.8) psychological distress, being a FSW (aOR=0.6; 95% 0.4-0.9), a female-  
45 DU (aOR=17.2; 95% CI 5.9-62.8) or a male-DU (aOR=18.2; 95%CI: 12.4-26.6) were associated with  
46 tobacco use (Table 4) (Table 4).  
47  
48  
49  
50  
51  
52  
53  
54  
55  
56  
57  
58  
59  
60

## Discussion

The aim of this study was to assess the prevalence of hazardous/harmful, binge alcohol consumption as well as tobacco consumption, and explore correlates of heavy alcohol consumption and tobacco use in three key populations in Togo. We observed a high prevalence of hazardous/harmful alcohol consumption and binge drinking. Alcohol consumption is frequent among FSW and much more among DU, specifically female-DU. In addition, there was a dose-response effect relationship between alcohol consumption and psychological distress across all three populations. Tobacco use was highly prevalent among DU and among people who had a hazardous/harmful alcohol consumption.

Alcohol consumption is highly prevalent among key populations groups: more than half of the sample were categorized as moderate or hazardous drinkers. This has been corroborated in the literature among key population groups. In a recent study in Kenya, among 1,476 MSM, 44% of the sample had a hazardous alcohol consumption, and, no relationship was found between alcohol and tobacco consumption and HIV infection (25). In another study among 3,588 MSM in China, alcohol prevalence was 56.1% with 16.8% of them being binge drinkers and 14.4% being recent hazardous drinkers, using the WHO AUDIT-C scale (26). Recent alcohol misuse was associated with increased sexual and HIV/syphilis risks as well as sexual risk behaviors including alcohol use before sex, sex without condoms and multiple concurrent partnerships. A prospective cohort study among 1,027 FSW in Uganda found that 78% of the sample reported using alcohol with 71% admitting to using alcohol at least once a week, with a reduced prevalence of 54% after two years of intervention (27). This emphasizes the need for alcohol risk reduction programs and programs specifically focused on the adoption of safer drinking practices integrated into HIV prevention packages and geared towards highly exposed groups (26,27).

Alcohol and tobacco consumption are particularly relevant to people living with HIV (PLHIV). Studies have demonstrated a negative impact of alcohol, tobacco and drug use on life expectancy for HIV-positive patients (28). Alcohol and tobacco use have also been associated with poor adherence to antiretroviral therapy (ART) and the interaction between all those substances leading to a higher susceptibility to co-morbidities, opportunistic infections such as tuberculosis (TB) (29,30). In this study, hazardous/harmful alcohol consumption and binge drinking were both significantly associated with tobacco use. This indicates the need for targeted prevention actions such as smoking cessation treatment and alcohol reducing counseling, among key populations, particularly among key populations living with HIV. A systematic review of interventions to reduce alcohol use among MSM indicated that although interventions such as motivational interviewing (MI) appear to be effective among MSM, they are scarce (31).

Psychological distress was found to have a dose-response relationship with alcohol consumption. Severe psychological distress was at least twice higher among people with a hazardous/harmful alcohol

1  
2  
3 consumption and people who were binge drinking. This is consistent with other studies that found a  
4 relationship between alcohol and drug abuse and psychological symptoms such as depression, anxiety  
5 and suicidal ideation among key populations (32,33) . Consistent with our findings, a study conducted  
6 in Cambodia among MSM found that 38.8% had severe psychological distress and that severe  
7 psychological distress was associated with alcohol and drug use, poor self-reported quality of life and  
8 reduced condom use at last sex (32). Another study among PLHIV in Uganda found that psychological  
9 distress was significantly associated with non-adherence to ART (34). This has implication for HIV  
10 prevention and further demonstrates the need for integrated services of mental health interventions,  
11 psychological support as well as substance abuse reduction program into HIV prevention programs. This  
12 would also imply that health care workers be sufficiently armed through training to screen and refer KP  
13 in need of those interventions.  
14  
15

16  
17  
18  
19  
20  
21 Very few studies have explored alcohol and tobacco consumption patterns among the three main key  
22 populations. This study found quite different patterns of consumption among the three groups, with  
23 MSM in this sample being the lowest at-risk group for hazardous/harmful alcohol consumption, binge  
24 drinking and tobacco use. DU on the other hand, particularly female-DU appear to be most vulnerable  
25 to hazardous/harmful alcohol consumption, binge drinking and tobacco use, as well as the group with  
26 the highest prevalence of severe psychological distress. This could potentially indicate that there is a  
27 difference in coping strategies for key populations and that, behavioral interventions specifically geared  
28 towards MSM have elements that perhaps have successfully enhanced their capacity to cope with the  
29 stress among the most marginalized groups. For example, studies have demonstrated the effectiveness  
30 of community-based organizations (CBOs), peer-led interventions and community engagement in HIV  
31 prevention among MSM (35–37). With the feminization of the HIV epidemic in SSA, it would be  
32 essential that female-DU be particularly taken into account as one of the most vulnerable and at risk  
33 group for HIV and that, targeted interventions be geared toward generating an interest for community  
34 building.  
35  
36

37  
38  
39  
40  
41  
42  
43  
44 Strengths of this study include the large sample size of the three main types of key populations. In  
45 addition, to our knowledge, this is the first study in Togo comparing alcohol and tobacco consumption  
46 in these key populations using standardized tools (AUDIT, Tobacco Questions for Surveys, and Kessler  
47 psychological distress scale). Finally, this study was completed in eight main cities of Togo, which could  
48 indicate that it is nationally representative.  
49  
50

51  
52  
53  
54  
55  
56  
57  
58  
59  
60  
60 However, there were few limitations including the fact that some variables such as childhood abuse,  
stigma, or recent trauma which could influence alcohol and tobacco consumption, have not been  
collected. Furthermore, self-reported data used in this study, are prone to social desirability and recall  
bias. Despite these limitations, the results presented in this study make a unique contribution to the  
literature on hazardous/harmful and binge alcohol consumption among key populations in West Africa.

### Conclusion

Alcohol and tobacco use and abuse are highly prevalent among key populations. There is a need for mental health and substance abuse screening, referral and treatment fully integrated into HIV prevention services for key populations.

For peer review only

### **Author contributorship**

ABA and FGK contributed equally to this paper. ABA, FGK, PAC and DKE conceived and designed the study with inputs from AJ. PJ, EKS, CAD, MS and TJB facilitated data collection and contributed to analysis of the data. ABA and FGK analyzed, interpreted the data and drafted the manuscript. PAC, AJ and DKE revised the manuscript for important intellectual content. All authors participated in the revision process and have approved the final version of the manuscript.

### **Competing interests**

No competing interests to declare

### **Funding**

This work was supported by the « Centre Africain de Recherche en Epidemiologie et en Santé Publique (CARESP) » (African Center for Epidemiology and Public Health Research) and the Togo National HIV/AIDS and STI Control Program.

### **Data sharing statement**

No additional data are available

### **Ethics approval and consent to participate**

This study was reviewed and approved by the Bioethics Committee for Research in Health in Togo (CBRS No. 18/2017/CBRS of June 22 2017). Consent was obtained from each participant prior to administering the survey questions.



## References

1. Kharsany ABM, Karim QA. HIV Infection and AIDS in Sub-Saharan Africa: Current Status, Challenges and Opportunities. *Open AIDS J.* 2016 Apr 8;10:34–48.
2. Joint United Nations Programme on HIV/AIDS (UNAIDS). Côte d'Ivoire: HIV and AIDS estimates [Internet]. 2017 [cited 2018 Nov 22]. Available from: <http://www.unaids.org/en/regionscountries/countries/ctedivoire>
3. Djomand G, Quaye S, Sullivan PS. HIV epidemic among key populations in west Africa. *Curr Opin HIV AIDS.* 2014 Sep;9(5):506–13.
4. HIV and AIDS in West and Central Africa Overview [Internet]. AVERT. 2017 [cited 2018 Jul 19]. Available from: <https://www.avert.org/hiv-and-aids-west-and-central-africa-overview>
5. Joint United Nations Programme on HIV/AIDS (UNAIDS). Togo [Internet]. [cited 2018 Jul 19]. Available from: <http://www.unaids.org/en/regionscountries/countries/togo>
6. World Health Organization (WHO). Global status report on alcohol and health, 2018 [Internet]. 2018 [cited 2018 Oct 10]. Available from: [http://www.who.int/substance\\_abuse/publications/global\\_alcohol\\_report/gsr\\_2018/en/](http://www.who.int/substance_abuse/publications/global_alcohol_report/gsr_2018/en/)
7. Lama TP, Kumoji E 'Kuor, Ketlogetswe D, Anderson M, Brahmabhatt H. Alcohol Consumption and Risky Sexual Behavior Among Persons Attending Alcohol Consumption Venues in Gaborone, Botswana. *Prev Sci Off J Soc Prev Res.* 2016 Feb;17(2):227–36.
8. Sileo KM, Kintu M, Chanes-Mora P, Kiene SM. “Such Behaviors Are Not in My Home Village, I Got Them Here”: A Qualitative Study of the Influence of Contextual Factors on Alcohol and HIV Risk Behaviors in a Fishing Community on Lake Victoria, Uganda. *AIDS Behav.* 2016 Mar;20(3):537–47.
9. Chersich MF, Rees HV. Causal links between binge drinking patterns, unsafe sex and HIV in South Africa: its time to intervene. *Int J STD AIDS.* 2010 Jan;21(1):2–7.
10. Chen Y, Li X, Shen Z, Zhou Y, Tang Z. Drinking reasons and alcohol problems by work venue among female sex workers in Guangxi, China. *Subst Use Misuse.* 2015 Apr;50(5):642–52.
11. Heravian A, Solomon R, Krishnan G, Vasudevan CK, Krishnan AK, Osmand T, et al. Alcohol consumption patterns and sexual risk behavior among female sex workers in two South Indian communities. *Int J Drug Policy.* 2012 Nov;23(6):498–504.
12. Tobacco [Internet]. World Health Organization. [cited 2018 Aug 3]. Available from: <http://www.who.int/news-room/fact-sheets/detail/tobacco>
13. World Health Organization. WHO global report on trends in prevalence of tobacco smoking, 2015. [Internet]. 2015 [cited 2018 Aug 2]. Available from: [http://apps.who.int/iris/bitstream/10665/156262/1/9789241564922\\_eng.pdf](http://apps.who.int/iris/bitstream/10665/156262/1/9789241564922_eng.pdf)



14. Commar A, Prasad VK, Tursan d'Espaignet E, Wolfenden L, Weltgesundheitsorganisation. WHO global report on trends in prevalence of tobacco smoking 2000-2025. 2018.
15. Reynolds NR. Cigarette smoking and HIV: More evidence for action. *AIDS Educ Prev Off Publ Int Soc AIDS Educ*. 2009 Jun;21(3 Suppl):106–21.
16. Agoudavi K, Ministère de la Santé, Togo. Rapport Final de l'enquête STEPS Togo 2010 [Internet]. Ministère de la Santé Togo; 2012. Available from: [http://www.who.int/ncds/surveillance/steps/2010STEPS\\_Report\\_Togo\\_FR.pdf](http://www.who.int/ncds/surveillance/steps/2010STEPS_Report_Togo_FR.pdf)
17. Jaquet A, Nouaman M, Tine J, Tanon A, Anoma C, Inwoley A, et al. Hepatitis B treatment eligibility in West Africa: uncertainties and need for prospective cohort studies. *Liver Int Off J Int Assoc Study Liver*. 2017 Aug;37(8):1116.
18. Babor TF, Higgins-Biddle JC, Saunders JB, Monteiro MG. The Alcohol Use Disorders Identification Test: Guidelines for Use in Primary Care [Internet]. World Health Organization (WHO); p. 41. Available from: [http://apps.who.int/iris/bitstream/handle/10665/67205/WHO\\_MSD\\_MSB\\_01.6a.pdf;jsessionid=3743A977A779D807D1894679A3E91DD3?sequence=1](http://apps.who.int/iris/bitstream/handle/10665/67205/WHO_MSD_MSB_01.6a.pdf;jsessionid=3743A977A779D807D1894679A3E91DD3?sequence=1)
19. Global Adult Tobacco Survey Collaborative Group, Centers for Disease Control and Prevention (CDC). Tobacco Questions for Surveys: A subset of key questions for the Global Adult Tobacco Survey (GATS) [Internet]. Atlanta, Georgia: Centers for Disease Control and Prevention; 2011. Available from: [http://www.who.int/tobacco/surveillance/en\\_tfi\\_tqs.pdf](http://www.who.int/tobacco/surveillance/en_tfi_tqs.pdf)
20. Kessler RC, Andrews G, Colpe LJ, Hiripi E, Mroczek DK, Normand SLT, et al. Short screening scales to monitor population prevalences and trends in non-specific psychological distress. *Psychol Med*. 2002 Aug;32(6):959–76.
21. Amon J, Brown T, Hogle J, MacNeil J, Magnani R, Mills S, et al. Guidelines for repeated behavioral surveys in populations at risk of HIV. :358.
22. Foxcroft DR, Smith LA, Thomas H, Howcutt S. Accuracy of Alcohol Use Disorders Identification Test for detecting problem drinking in 18-35 year-olds in England: method comparison study. *Alcohol Alcohol Oxf Oxf*. 2015 Mar;50(2):244–50.
23. Gache P, Michaud P, Landry U, Accietto C, Arfaoui S, Wenger O, et al. The Alcohol Use Disorders Identification Test (AUDIT) as a screening tool for excessive drinking in primary care: reliability and validity of a French version. *Alcohol Clin Exp Res*. 2005 Nov;29(11):2001–7.
24. Andrews G, Slade T. Interpreting scores on the Kessler Psychological Distress Scale (K10). *Aust N Z J Public Health*. 2001 Dec;25(6):494–7.
25. Korhonen C, Kimani M, Wahome E, Otieno F, Okall D, Bailey RC, et al. Depressive symptoms and problematic alcohol and other substance use in 1476 gay, bisexual, and other MSM at three research sites in Kenya. *AIDS Lond Engl*. 2018 Jul 17;32(11):1507–15.

- 1
- 2
- 3 26. Liu Y, Ruan Y, Strauss SM, Yin L, Liu H, Amico KR, et al. Alcohol misuse, risky
- 4 sexual behaviors, and HIV or syphilis infections among Chinese men who have sex with
- 5 men. *Drug Alcohol Depend.* 2016 Nov 1;168:239–46.
- 6
- 7 27. Weiss HA, Vandepitte J, Bukenya JN, Mayanja Y, Nakubulwa S, Kamali A, et al. High
- 8 Levels of Persistent Problem Drinking in Women at High Risk for HIV in Kampala,
- 9 Uganda: A Prospective Cohort Study. *Int J Environ Res Public Health* [Internet]. 2016
- 10 Feb [cited 2018 Sep 20];13(2). Available from:
- 11 <https://www.ncbi.nlm.nih.gov/pmc/articles/PMC4772173/>
- 12
- 13
- 14 28. Petoumenos K, Law MG. Smoking, alcohol and illicit drug use effects on survival in
- 15 HIV-positive persons. *Curr Opin HIV AIDS.* 2016;11(5):514–20.
- 16
- 17 29. Jaquet A, Ekouevi D-K, Aboubakrine M, Bashi J, Messou E, Maiga M, et al. Tobacco
- 18 use and its determinants in HIV-infected patients on antiretroviral therapy in West
- 19 African countries. *Int J Tuberc Lung Dis.* 2009 Nov;13(11):1433–9.
- 20
- 21
- 22 30. Schneider M, Chersich M, Temmerman M, Degomme O, Parry CD. The impact of
- 23 alcohol on HIV prevention and treatment for South Africans in primary healthcare.
- 24 *Curationis.* 2014 Aug 1;37(1):1137.
- 25
- 26 31. Wray TB, Grin B, Dorfman L, Glynn TR, Kahler C. Systematic Review of Interventions
- 27 to Reduce Problematic Alcohol Use in Men who have Sex with Men. *Drug Alcohol Rev.*
- 28 2016;35(2):148–57.
- 29
- 30
- 31 32. Yi S, Tuot S, Chhoun P, Pal K, Choub SC, Mburu G. Mental health among men who
- 32 have sex with men in Cambodia: Implications for integration of mental health services
- 33 within HIV programmes. *Int J Equity Health.* 2016 Mar 24;15:53.
- 34
- 35 33. Stoloff K, Joska JA, Feast D, De Swardt G, Hugo J, Struthers H, et al. A description of
- 36 common mental disorders in men who have sex with men (MSM) referred for
- 37 assessment and intervention at an MSM clinic in Cape Town, South Africa. *AIDS*
- 38 *Behav.* 2013 May;17 Suppl 1:S77-81.
- 39
- 40
- 41 34. Nakimuli-Mpungu E, Mutamba B, Othengo M, Musisi S. Psychological distress and
- 42 adherence to highly active anti-retroviral therapy (HAART) in Uganda: A pilot study.
- 43 *Afr Health Sci.* 2009 Aug 1;9(Suppl 1):S2–7.
- 44
- 45 35. Ye S, et al. Efficacy of peer-led interventions to reduce unprotected anal intercourse
- 46 among men who have sex with men: a meta-analysis. - PubMed - NCBI. *PLOS ONE*
- 47 [Internet]. 2014 [cited 2018 Nov 5];9(3). Available from:
- 48 <https://www.ncbi.nlm.nih.gov/pubmed/24614809>
- 49
- 50
- 51 36. Shangani S, et al. Effectiveness of peer-led interventions to increase HIV testing among
- 52 men who have sex with men: a systematic review and meta-analysis. - PubMed - NCBI.
- 53 *AIDS Care* [Internet]. 2017 [cited 2018 Nov 5];29(8). Available from:
- 54 <https://www.ncbi.nlm.nih.gov/pubmed/28150501>
- 55
- 56 37. Chuang D, Lacombe-Duncan A. Community engagement among men who have sex
- 57 with men living with HIV/AIDS in Taiwan. - PubMed - NCBI. *AIDS Care* [Internet].
- 58 2016 [cited 2018 Nov 5];28(4). Available from:
- 59 <https://www.ncbi.nlm.nih.gov/pubmed/26586156>
- 60

**Table 1:** Socio-demographic and health characteristics

|                                                | <b>MSM (n=641)</b><br><b>n (%)</b> | <b>FSW (n=937)</b><br><b>n (%)</b> | <b>Female DU (n=27)</b><br><b>n (%)</b> | <b>Male DU (n=510)</b><br><b>n (%)</b> | <b>Total (=2115)</b><br><b>n (%)</b> | <b>p-value</b> |
|------------------------------------------------|------------------------------------|------------------------------------|-----------------------------------------|----------------------------------------|--------------------------------------|----------------|
| <b>Age (years)</b>                             |                                    |                                    |                                         |                                        |                                      |                |
| 18 – 25                                        | 442 (68.9)                         | 456 (48.7)                         | 9 (33.3)                                | 174 (34.1)                             | 1081 (51.1)                          | <0.001         |
| >25                                            | 199 (31.1)                         | 481 (51.3)                         | 18 (66.7)                               | 336 (65.9)                             | 1034 (48.9)                          |                |
| <b>Marital status</b>                          |                                    |                                    |                                         |                                        |                                      |                |
| Married                                        | 41 (6.4)                           | 130 (13.9)                         | 12 (44.4)                               | 173 (33.9)                             | 356 (16.8)                           | <0.001         |
| Not married                                    | 600 (93.6)                         | 807 (86.1)                         | 15 (55.6)                               | 337 (66.1)                             | 1759 (83.2)                          |                |
| <b>Education level</b>                         |                                    |                                    |                                         |                                        |                                      |                |
| Never went to school                           | 1 (0.2)                            | 158 (16.8)                         | 3 (11.1)                                | 26 (5.1)                               | 188 (8.9)                            | <0.001         |
| Primary school                                 | 51 (7.9)                           | 263 (28.1)                         | 18 (66.7)                               | 145 (28.4)                             | 477 (22.6)                           |                |
| Secondary school                               | 356 (55.5)                         | 471 (50.3)                         | 6 (22.2)                                | 310 (60.8)                             | 1143 (54.0)                          |                |
| College/University                             | 233 (36.4)                         | 45 (4.8)                           | 0 (0.00)                                | 29 (5.7)                               | 307 (14.5)                           |                |
| <b>Religion</b>                                |                                    |                                    |                                         |                                        |                                      |                |
| Other/ Non-believers                           | 65 (10.1)                          | 100 (10.7)                         | 6 (22.2)                                | 92 (18.0)                              | 263 (12.4)                           | <0.001         |
| Christians                                     | 522 (81.5)                         | 743 (79.3)                         | 19 (70.4)                               | 337 (66.1)                             | 1621 (76.7)                          |                |
| Muslims                                        | 54 (8.4)                           | 94 (10.0)                          | 2 (7.4)                                 | 81 (15.9)                              | 231 (10.9)                           |                |
| <b>Place of residence</b>                      |                                    |                                    |                                         |                                        |                                      |                |
| Lomé                                           | 447 (69.7)                         | 526 (5.1)                          | 23 (85.2)                               | 293 (57.4)                             | 1289 (60.9)                          | <0.001         |
| Other                                          | 194 (30.3)                         | 411 (43.9)                         | 4 (14.8)                                | 217 (42.6)                             | 826 (39.1)                           |                |
| <b>Psychological distress</b>                  |                                    |                                    |                                         |                                        |                                      |                |
| Likely not to have psychological distress      | 497 (77.5)                         | 538 (57.4)                         | 5 (18.5)                                | 238 (46.7)                             | 1278 (60.4)                          | <0.001         |
| Likely to have mild psychological distress     | 80 (12.5)                          | 223 (23.8)                         | 5 (18.5)                                | 118 (23.1)                             | 426 (20.1)                           |                |
| Likely to have moderate psychological distress | 55 (8.6)                           | 117 (12.5)                         | 8 (29.6)                                | 95 (18.6)                              | 275 (13.0)                           |                |

|                                              |            |            |           |            |             |        |
|----------------------------------------------|------------|------------|-----------|------------|-------------|--------|
| Likely to have severe psychological distress | 9 (1.4)    | 59 (6.3)   | 9 (33.4)  | 59 (11.6)  | 136 (6.5)   |        |
| <b>HIV Infection</b>                         |            |            |           |            |             |        |
| Yes                                          | 131 (20.4) | 119 (12.7) | 5 (18.5)  | 10 (1.9)   | 265 (12.5)  | <0.001 |
| No                                           | 480 (74.9) | 787 (84.0) | 20 (74.1) | 390 (76.5) | 1677 (79.3) |        |
| Not tested                                   | 30 (4.7)   | 31 (3.3)   | 2 (7.4)   | 110 (21.6) | 173 (8.2)   |        |

FSW: Female sex worker; MSM: Men who have sex with men; FDU: Female drug user; MDU: Male drug user; IQR: Interquartile range

For peer review only

**Table 2:** Alcohol and Tobacco consumption among key populations in Togo in 2017

| <b>Addictive behaviour</b>                        | <b>MSM (n= 641)<br/>n (%)</b> | <b>FSW(n=937)<br/>n (%)</b> | <b>Female DU (n=27)<br/>n (%)</b> | <b>Male DU (n=510)<br/>n (%)</b> | <b>Total (N=2115)<br/>N (%)</b> | <b>p-value</b> |
|---------------------------------------------------|-------------------------------|-----------------------------|-----------------------------------|----------------------------------|---------------------------------|----------------|
| <b>Alcohol consumption</b>                        |                               |                             |                                   |                                  |                                 |                |
| Non-drinker                                       | 338 (52.7)                    | 318 (33.9)                  | 2 (7.4)                           | 86 (16.9)                        | 744 (35.2)                      |                |
| Moderate drinking <sup>1</sup>                    | 169 (26.4)                    | 275 (29.4)                  | 5 (18.5)                          | 109 (21.4)                       | 558 (26.4)                      | <0.001         |
| Hazardous consumption                             | 134 (20.9)                    | 344 (36.7)                  | 20 (74.1)                         | 315 (61.7)                       | 813 (38.4)                      |                |
| <b>Binge drinking <sup>2</sup></b>                | <b>196(30.6)</b>              | <b>406 (43.3)</b>           | <b>20 (74.0)</b>                  | <b>340 (66.7)</b>                | <b>962 (45.5)</b>               |                |
| <b>Binge drinking among drinkers <sup>2</sup></b> | <b>196 (64.7)</b>             | <b>406 (65.6)</b>           | <b>20 (80.0)</b>                  | <b>340 (80.2)</b>                | <b>962 (70.2)</b>               |                |
| <b>Tobacco Use</b>                                |                               |                             |                                   |                                  |                                 |                |
| Yes                                               | 97 (15.1)                     | 116 (12.4)                  | 23 (85.2)                         | 411 (80.6)                       | 647 (30.6)                      |                |
| <i>Everyday</i>                                   | 16 (16.5)                     | 49 (42.2)                   | 16 (69.6)                         | 327 (79.6)                       | 408 (63.1)                      | <0.001         |
| No                                                | 544 (84.9)                    | 821 (87.6)                  | 4 (14.8)                          | 99 (19.4)                        | 1468 (69.4)                     |                |

FSW: female sex worker; MSM: Men who have sex with men; MDU: Male drug user; FDU: Female drug user

<sup>1</sup>Moderate drinking levels depend on sex (differences in metabolism for females and males): AUDIT score: 1-6 for females and AUDIT score: 1-7 for males

<sup>2</sup>Binge drinking is defined as the consumption of six or more alcohol drinks at least once per month in one occasion (Question 3 of the AUDIT)

**Table 3:** Factors associated with hazardous alcohol consumption and binge drinking among key populations in Togo in 2017

|                        | Hazardous/harmful alcohol consumption |                |         |                       |              | Binge drinking      |               |              |                       |              |
|------------------------|---------------------------------------|----------------|---------|-----------------------|--------------|---------------------|---------------|--------------|-----------------------|--------------|
|                        | Univariate analysis                   |                |         | Multivariate analysis |              | Univariate analysis |               |              | Multivariate analysis |              |
|                        | n/N                                   | OR (95% CI)    | p-value | aOR (95% CI)          | p-value      | n/N                 | OR (95% CI)   | p-value      | aOR (95% CI)          | p-value      |
| <b>Age (years)</b>     |                                       |                |         |                       | <b>0.05</b>  |                     |               |              |                       | <b>0.05</b>  |
| 18 – 25                | 351/1081                              | 1              |         | 1                     |              | 433/1081            | 1             |              | 1                     |              |
| >25                    | 462/1034                              | 1.7 (1.4-2.0)  | 0.001   | 1.3 (1.1-1.6)         | 0.05         | 529/1034            | 1.6 (1.3-1.9) | 0.001        | 1.3 (1.1-1.6)         | 0.01         |
| <b>Marital status</b>  |                                       |                |         |                       | <b>0.97</b>  |                     |               |              |                       |              |
| Not married            | 641/1759                              | 1              |         | 1                     |              | 777/1759            | 1             |              | 1                     |              |
| Married                | 172/356                               | 1.6 (1.302-1)  | 0.001   | 1.0 (0.8-1.3)         |              | 185/356             | 1.4 (1.1-1.7) | 0.001        |                       |              |
| <b>Education level</b> |                                       |                | 0.001   |                       | <b>0.19</b>  |                     |               | <b>0.001</b> |                       | <b>0.01</b>  |
| Never been to school   | 64/188                                | 1              |         | 1                     |              | 69/188              | 1             |              | 1                     |              |
| Primary school         | 232/477                               | 1.8 (1.3-2.6)  | 0.001   | 1.50 (1.0-2.2)        | 0.05         | 256/477             | 2.0 (1.4-2.8) | 0.001        | 1.6 (1.1-2.4)         | 0.01         |
| Secondary school       | 436/1143                              | 1.2 (0.9-1.7)  | 0.283   | 1.3 (0.9-1.8)         | 0.26         | 517/1143            | 1.4 (1.0-2.0) | 0.05         | 1.5 (1.0-2.1)         | 0.05         |
| University             | 81/307                                | 0.7 (0.5- 1.0) | 0.10    | 1.3 (0.8-2.2)         | 0.21         | 120/307             | 1.1 (0.8-1.6) | 0.60         | 2.1 (1.3-3.3)         | 0.01         |
| <b>Religion</b>        |                                       |                | 0.001   |                       | <b>0.001</b> |                     |               | <b>0.001</b> |                       | <b>0.001</b> |
| Others/ Non-believers  | 56/112                                | 1              |         | 1                     |              | 151/263             | 1             |              | 1                     |              |
| Christians             | 596/1621                              | 0.5 (0.4-0.7)  | 0.001   | 0.7 (0.5-0.9)         | 0.05         | 718/1621            | 0.6 (0.5-0.8) | 0.001        | 0.71 (0.5-1.0)        | 0.05         |
| Muslims                | 80/231                                | 0.5 (0.3-0.7)  | 0.001   | 0.4 (0.3-0.6)         | 0.001        | 93/231              | 0.5 (0.4-0.7) | 0.001        | 0.4 (0.3-0.7)         | 0.001        |

|                                                |          |                 |       |                |              |          |                |              |               |
|------------------------------------------------|----------|-----------------|-------|----------------|--------------|----------|----------------|--------------|---------------|
| <b>Place of residence</b>                      |          |                 |       |                | <b>0.001</b> |          |                |              | <b>0.001</b>  |
| Lomé                                           | 392/1289 | 1               |       | 1              |              | 486/1289 | 1              | 1            |               |
| Others                                         | 421/826  | 2.4 (2.0-2.9)   | 0.001 | 2.8 (2.2-3.4)  | 0.001        | 476/826  | 2.3 (1.9-2.7)  | 0.001        | 2.5 (2.0-3.0) |
| <b>Tobacco use</b>                             |          |                 |       |                | <b>0.001</b> |          |                |              | <b>0.001</b>  |
| No                                             | 423/1468 | 1               |       | 1              |              | 533/1468 | 1              | 1            |               |
| Yes                                            | 390/647  | 3.8 (3.1-4.6)   | 0.001 | 2.6 (2.0-3.4)  | 0.001        | 429/647  | 3.5 (2.8-4.2)  | 0.001        | 2.6 (2.0-3.4) |
| <b>Psychological distress</b>                  |          |                 | 0.001 |                | <b>0.001</b> |          |                | <b>0.001</b> | <b>0.001</b>  |
| Likely to not have psychological distress      | 387/1278 | 1               |       | 1              |              | 491/1278 | 1              | 1            |               |
| Likely to have mild psychological distress     | 174/426  | 1.6 (1.3-2.0)   | 0.001 | 1.2 (0.9-1.5)  | 0.20         | 220/426  | 1.7 (1.4-2.1)  | 0.001        | 1.4 (1.1-1.7) |
| Likely to have moderate psychological distress | 159/275  | 3.2 (2.4-4.1)   | 0.001 | 2.5 (1.9-3.4)  | 0.001        | 160/275  | 2.2 (1.7-2.9)  | 0.001        | 1.8 (1.3-2.4) |
| Likely to have severe psychological distress   | 93/136   | 5.0 (3.4-7.4)   | 0.001 | 3.3 (2.2-5.1)  | 0.001        | 91/136   | 3.2 (2.2-4.8)  | 0.001        | 2.2 (1.5-3.4) |
| <b>HIV infection</b>                           |          |                 | 0.001 |                | <b>0.05</b>  |          |                | <b>0.001</b> | <b>0.05</b>   |
| No                                             | 665/1677 | 1               |       | 1              |              | 784/1677 | 1              | 1            |               |
| Yes                                            | 67/265   | 0.5 (0.4-0.7)   | 0.001 | 0.7 (0.5-1.0)  | 0.05         | 84/265   | 0.5 (0.4-0.7)  | 0.001        | 0.7 (0.5-1.0) |
| Not completed                                  | 81/173   | 1.3 (1.0-1.8)   | 0.10  | 1.2 (0.8-1.8)  | 0.30         | 94/173   | 1.4 (1.0-1.9)  | 0.10         | 1.2 (0.9-1.8) |
| <b>Key population</b>                          |          |                 | 0.001 |                | <b>0.001</b> |          |                | <b>0.001</b> | <b>0.001</b>  |
| MSM                                            | 134/641  | 1               |       | 1              |              | 196/641  | 1              | 1            |               |
| FSW                                            | 344/937  | 2.2 (1.7-2.8)   | 0.001 | 1.8 (1.4-2.4)  | 0.001        | 406/937  | 1.7 (1.4-2.2)  | 0.001        | 1.6 (1.3-2.1) |
| Female DU                                      | 20/27    | 10.8 (4.7-28.0) | 0.001 | 3.8 (1.5-10.5) | 0.01         | 20/27    | 6.5 (2.8-16.8) | 0.001        | 2.9 (1.2-7.9) |
| Male DU                                        | 315/510  | 6.1 (4.7-8.0)   | 0.001 | 2.4 (1.7-3.4)  | 0.001        | 340/510  | 4.5 (3.6-5.8)  | 0.001        | 2.0 (1.4-2.8) |

aOR: adjusted odds ratio; OR: odds ratio; 95%CI: 95% confidence interval; FDU: female drug user; MDU: male drug user; FSW: female sex worker; MSM: men who have sex with men

**Table 4.** Factors associated with tobacco use among key populations in Togo in 2017

|                                           | Univariate analysis |                |       | Multivariate analysis |              |
|-------------------------------------------|---------------------|----------------|-------|-----------------------|--------------|
|                                           | n/N                 | OR (95% CI)    | P     | aOR (95% CI)          | P            |
| <b>Age (years)</b>                        |                     |                |       |                       | <b>0.14</b>  |
| 18 – 25                                   | 280/1081            | 1              |       | 1                     |              |
| >25                                       | 367/1034            | 1.6 (1.3 -1.9) | 0.001 | 0.81 (0.6-1.1)        | 0.15         |
| <b>Marital status</b>                     |                     |                |       |                       | <b>0.22</b>  |
| Not married                               | 481/1759            | 1              |       | 1                     |              |
| Married                                   | 356                 | 2.3 (1.8-2.9)  | 0.001 | 0.8 (0.6-1.1)         | 0.22         |
| <b>Level of education</b>                 |                     |                | 0.001 |                       | <b>0.32</b>  |
| None                                      | 42/188              | 1              |       | 1                     |              |
| Primary school                            | 186/477             | 2.2 (1.5-3.3)  | 0.001 | 1.3 (0.8-2.3)         | 0.26         |
| Secondary/high school                     | 364/1143            | 1.6 (1.1-2.4)  | 0.01  | 1.2 (0.7-1.9)         | 0.59         |
| University                                | 55/307              | 0.8 (0.5-1.2)  | 0.230 | 0.9 (0.5-1.7)         | 0.73         |
| <b>Religion</b>                           |                     |                | 0.001 |                       | <b>0.05</b>  |
| Others/ Non-believers                     | 40/112              | 1              |       | 1                     |              |
| Christians                                | 436/1621            | 0.5 (0.4-0.6)  | 0.001 | 0.7 (0.5-1.0)         | 0.10         |
| Muslims                                   | 96/231              | 0.9 (0.6-1.3)  | 0.63  | 1.1 (0.7-1.9)         | 0.60         |
| <b>Place of residence</b>                 |                     |                |       |                       | <b>0.001</b> |
| Lomé                                      | 400/1289            | 1              |       | 1                     |              |
| Others                                    | 247/826             | 1.0 (0.8-1.2)  | 0.59  | 0.6 (0.5-0.8)         | 0.001        |
| <b>Alcohol consumption</b>                |                     |                |       |                       | <b>0.001</b> |
| No risky consumption                      | 257/1302            | 1              |       | 1                     |              |
| Hazardous/harmful drinking                | 390/813             | 3.8 (3.1-4.6)  | 0.001 | 2.6 (2.0-3.4)         | 0.001        |
| <b>Psychological distress</b>             |                     |                | 0.001 |                       | <b>0.01</b>  |
| Likely to not have psychological distress | 300/1278            | 1              |       | 1                     |              |



1  
2  
3  
4  
5  
6  
7  
8  
9  
10  
11  
12  
13  
14  
15  
16  
17  
18  
19  
20  
21  
22  
23  
24  
25  
26  
27  
28  
29  
30  
31  
32  
33  
34  
35  
36  
37  
38  
39  
40  
41  
42  
43  
44  
45  
46

|                                                |          |                   |       |                  |              |
|------------------------------------------------|----------|-------------------|-------|------------------|--------------|
| Likely to have mild psychological distress     | 150/426  | 1.8 (1.4-2.2)     | 0.001 | 1.5 (1.1-2.1)    | 0.01         |
| Likely to have moderate psychological distress | 128/275  | 2.8 (2.2-3.7)     | 0.001 | 2.0 (1.3-2.8)    | 0.001        |
| Likely to have severe psychological distress   | 69/136   | 3.4 (2.3-4.8)     | 0.001 | 1.3 (0.8-2.2)    | 0.30         |
| <b>HIV infection</b>                           |          |                   | 0.001 |                  | <b>0.34</b>  |
| No                                             | 509/1677 | 1                 |       | 1                |              |
| Yes                                            | 44/265   | 0.5 (0.3-0.6)     | 0.001 | 0.9 (0.6-1.3)    | 0.51         |
| Not completed                                  | 94/173   | 2.7 (2.0-3.8)     | 0.001 | 0.7 (0.5-1.2)    | 0.17         |
| <b>Key populations</b>                         |          |                   | 0.001 |                  | <b>0.001</b> |
| MSM                                            | 97/641   | 1                 |       | 1                |              |
| FSW                                            | 116/937  | 0.8 (0.6-1.1)     | 0.12  | 0.6 (0.4-0.9)    | 0.01         |
| Female DU                                      | 23/27    | 32.3 (12.1-111.8) | 0.001 | 17.2 (5.93-62.8) | 0.001        |
| Male DU                                        | 411/510  | 23.3 (17.2-31.9)  | 0.001 | 18.0 (12.4-26.6) | 0.001        |

---

aOR: adjusted odds ratio; OR: odds ratio; 95%CI: 95% confidence interval; FDU: female drug user; MDU: male drug user;  
 FSW: female sex worker; MSM: men who have sex with men

Peer review only

1  
2  
3  
4  
5  
6  
7  
8  
9  
10  
11  
12  
13  
14  
15  
16  
17  
18  
19  
20  
21  
22  
23  
24  
25  
26  
27  
28  
29  
30  
31  
32  
33  
34  
35  
36  
37  
38  
39  
40  
41  
42  
43  
44  
45  
46

For peer review only

1  
2  
3  
4  
5  
6  
7  
8  
9  
10  
11  
12  
13  
14  
15  
16  
17  
18  
19  
20  
21  
22  
23  
24  
25  
26  
27  
28  
29  
30  
31  
32  
33  
34  
35  
36  
37  
38  
39  
40  
41  
42  
43  
44  
45  
46  
47  
48  
49  
50  
51  
52  
53  
54  
55  
56  
57  
58  
59  
60STROBE Statement—Checklist of items that should be included in reports of *cross-sectional studies*

|                              | Item No | Recommendation                                                                                                                                                                                               |     | Pages    |
|------------------------------|---------|--------------------------------------------------------------------------------------------------------------------------------------------------------------------------------------------------------------|-----|----------|
| <b>Title and abstract</b>    | 1       | (a) Indicate the study's design with a commonly used term in the title or the abstract                                                                                                                       | X   | 1        |
|                              |         | (b) Provide in the abstract an informative and balanced summary of what was done and what was found                                                                                                          | X   | 2        |
| <b>Introduction</b>          |         |                                                                                                                                                                                                              |     |          |
| Background/rationale         | 2       | Explain the scientific background and rationale for the investigation being reported                                                                                                                         | X   | 4        |
| Objectives                   | 3       | State specific objectives, including any prespecified hypotheses                                                                                                                                             | X   | 4        |
| <b>Methods</b>               |         |                                                                                                                                                                                                              |     |          |
| Study design                 | 4       | Present key elements of study design early in the paper                                                                                                                                                      | X   | 6        |
| Setting                      | 5       | Describe the setting, locations, and relevant dates, including periods of recruitment, exposure, follow-up, and data collection                                                                              | X   | 6        |
| Participants                 | 6       | (a) Give the eligibility criteria, and the sources and methods of selection of participants                                                                                                                  | X   | 6        |
| Variables                    | 7       | Clearly define all outcomes, exposures, predictors, potential confounders, and effect modifiers. Give diagnostic criteria, if applicable                                                                     | X   | 6-7      |
| Data sources/<br>measurement | 8*      | For each variable of interest, give sources of data and details of methods of assessment (measurement). Describe comparability of assessment methods if there is more than one group                         | X   | 6-7      |
| Bias                         | 9       | Describe any efforts to address potential sources of bias                                                                                                                                                    | X   | 6        |
| Study size                   | 10      | Explain how the study size was arrived at                                                                                                                                                                    | X   | 6        |
| Quantitative variables       | 11      | Explain how quantitative variables were handled in the analyses. If applicable, describe which groupings were chosen and why                                                                                 | X   | 7        |
| Statistical methods          | 12      | (a) Describe all statistical methods, including those used to control for confounding                                                                                                                        | X   | 7        |
|                              |         | (b) Describe any methods used to examine subgroups and interactions                                                                                                                                          | X   | 7        |
|                              |         | (c) Explain how missing data were addressed                                                                                                                                                                  | N/A |          |
|                              |         | (d) If applicable, describe analytical methods taking account of sampling strategy                                                                                                                           | N/A |          |
|                              |         | (e) Describe any sensitivity analyses                                                                                                                                                                        | N/A |          |
| <b>Results</b>               |         |                                                                                                                                                                                                              |     |          |
| Participants                 | 13*     | (a) Report numbers of individuals at each stage of study—eg numbers potentially eligible, examined for eligibility, confirmed eligible, included in the study, completing follow-up, and analysed            | X   | 8        |
|                              |         | (b) Give reasons for non-participation at each stage                                                                                                                                                         | N/A |          |
|                              |         | (c) Consider use of a flow diagram                                                                                                                                                                           | N/A |          |
| Descriptive data             | 14*     | (a) Give characteristics of study participants (eg demographic, clinical, social) and information on exposures and potential confounders                                                                     | X   | 8; 18-19 |
|                              |         | (b) Indicate number of participants with missing data for each variable of interest                                                                                                                          | N/A |          |
| Outcome data                 | 15*     | Report numbers of outcome events or summary measures                                                                                                                                                         | X   | 8        |
| Main results                 | 16      | (a) Give unadjusted estimates and, if applicable, confounder-adjusted estimates and their precision (eg, 95% confidence interval). Make clear which confounders were adjusted for and why they were included | X   | 8-9      |

|                          |    |                                                                                                                                                                            |     |       |
|--------------------------|----|----------------------------------------------------------------------------------------------------------------------------------------------------------------------------|-----|-------|
|                          |    | (b) Report category boundaries when continuous variables were categorized                                                                                                  | X   | 8-9   |
|                          |    | (c) If relevant, consider translating estimates of relative risk into absolute risk for a meaningful time period                                                           | N/A |       |
| Other analyses           | 17 | Report other analyses done—eg analyses of subgroups and interactions, and sensitivity analyses                                                                             | N/A |       |
| <b>Discussion</b>        |    |                                                                                                                                                                            |     |       |
| Key results              | 18 | Summarise key results with reference to study objectives                                                                                                                   | X   | 10    |
| Limitations              | 19 | Discuss limitations of the study, taking into account sources of potential bias or imprecision. Discuss both direction and magnitude of any potential bias                 | X   | 11    |
| Interpretation           | 20 | Give a cautious overall interpretation of results considering objectives, limitations, multiplicity of analyses, results from similar studies, and other relevant evidence | X   | 10    |
| Generalisability         | 21 | Discuss the generalisability (external validity) of the study results                                                                                                      | X   | 10-11 |
| <b>Other information</b> |    |                                                                                                                                                                            |     |       |
| Funding                  | 22 | Give the source of funding and the role of the funders for the present study and, if applicable, for the original study on which the present article is based              | X   | 13    |

\*Give information separately for exposed and unexposed groups.

**Note:** An Explanation and Elaboration article discusses each checklist item and gives methodological background and published examples of transparent reporting. The STROBE checklist is best used in conjunction with this article (freely available on the Web sites of PLoS Medicine at <http://www.plosmedicine.org/>, Annals of Internal Medicine at <http://www.annals.org/>, and Epidemiology at <http://www.epidem.com/>). Information on the STROBE Initiative is available at [www.strobe-statement.org](http://www.strobe-statement.org).

# BMJ Open

## PREVALENCE AND CORRELATES OF ALCOHOL AND TOBACCO USE AMONG KEY POPULATIONS IN TOGO IN 2017: A CROSS-SECTIONAL STUDY

|                                 |                                                                                                                                                                                                                                                                                                                                                                                                                                                                                                                                                                                                                                                                                                                                                                                                                                                                                                                                                                                                                                                                                                                                                                                                                                                                                                                                                                    |
|---------------------------------|--------------------------------------------------------------------------------------------------------------------------------------------------------------------------------------------------------------------------------------------------------------------------------------------------------------------------------------------------------------------------------------------------------------------------------------------------------------------------------------------------------------------------------------------------------------------------------------------------------------------------------------------------------------------------------------------------------------------------------------------------------------------------------------------------------------------------------------------------------------------------------------------------------------------------------------------------------------------------------------------------------------------------------------------------------------------------------------------------------------------------------------------------------------------------------------------------------------------------------------------------------------------------------------------------------------------------------------------------------------------|
| Journal:                        | <i>BMJ Open</i>                                                                                                                                                                                                                                                                                                                                                                                                                                                                                                                                                                                                                                                                                                                                                                                                                                                                                                                                                                                                                                                                                                                                                                                                                                                                                                                                                    |
| Manuscript ID                   | bmjopen-2019-028934.R1                                                                                                                                                                                                                                                                                                                                                                                                                                                                                                                                                                                                                                                                                                                                                                                                                                                                                                                                                                                                                                                                                                                                                                                                                                                                                                                                             |
| Article Type:                   | Research                                                                                                                                                                                                                                                                                                                                                                                                                                                                                                                                                                                                                                                                                                                                                                                                                                                                                                                                                                                                                                                                                                                                                                                                                                                                                                                                                           |
| Date Submitted by the Author:   | 14-Jun-2019                                                                                                                                                                                                                                                                                                                                                                                                                                                                                                                                                                                                                                                                                                                                                                                                                                                                                                                                                                                                                                                                                                                                                                                                                                                                                                                                                        |
| Complete List of Authors:       | <p>Bitty-Anderson, Alexandra; PACCI Research Center - Site ANRS Côte d'Ivoire<br/>           GBEASOR-KOMLANVI, Fifonsi Adjidossi; Université de Lomé Faculté des Sciences de la Santé; Centre Africain de Recherches en Epidémiologie et en Santé Publique (CARESP)<br/>           Johnson, Pascal; Centre Africain de Recherches en Epidémiologie et en Santé Publique (CARESP)<br/>           Sewu, Essèboè; Centre Africain de Recherches en Epidémiologie et en Santé Publique (CARESP)<br/>           Dagnra, Claver; Université de Lomé Laboratoire de Biologie Moléculaire Salou, Mounerou; Université de Lomé Laboratoire de Biologie Moléculaire Blatome, Tetouyaba; Centre Africain de Recherches en Epidémiologie et en Santé Publique (CARESP)<br/>           Jaquet, Antoine; INSERM U1219 Bordeaux Population Health Research Université de Bordeaux; Université de Bordeaux Institut de Santé Publique Epidémiologie et Développement<br/>           Coffie, Patrick; Université de Bordeaux Institut de Santé Publique Epidémiologie et Développement; Université Felix Houphouët-Boigny Unité de Formation et de Recherche des Sciences Médicales, Dermatologie et Infectiologie<br/>           Ekouevi, Didier; Université de Lomé Faculté des Sciences de la Santé; INSERM U1219 Bordeaux Population Health Research Université de Bordeaux</p> |
| <b>Primary Subject Heading</b>: | HIV/AIDS                                                                                                                                                                                                                                                                                                                                                                                                                                                                                                                                                                                                                                                                                                                                                                                                                                                                                                                                                                                                                                                                                                                                                                                                                                                                                                                                                           |
| Secondary Subject Heading:      | Public health                                                                                                                                                                                                                                                                                                                                                                                                                                                                                                                                                                                                                                                                                                                                                                                                                                                                                                                                                                                                                                                                                                                                                                                                                                                                                                                                                      |
| Keywords:                       | EPIDEMIOLOGY, HIV & AIDS < INFECTIOUS DISEASES, Public health < INFECTIOUS DISEASES, Substance misuse < PSYCHIATRY, Key Populations                                                                                                                                                                                                                                                                                                                                                                                                                                                                                                                                                                                                                                                                                                                                                                                                                                                                                                                                                                                                                                                                                                                                                                                                                                |
|                                 |                                                                                                                                                                                                                                                                                                                                                                                                                                                                                                                                                                                                                                                                                                                                                                                                                                                                                                                                                                                                                                                                                                                                                                                                                                                                                                                                                                    |

SCHOLARONE™  
Manuscripts

1  
2  
3  
4  
5  
6  
7  
8  
9  
10  
11  
12  
13  
14  
15  
16  
17  
18  
19  
20  
21  
22  
23  
24  
25  
26  
27  
28  
29  
30  
31  
32  
33  
34  
35  
36  
37  
38  
39  
40  
41  
42  
43  
44  
45  
46  
47  
48  
49  
50  
51  
52  
53  
54  
55  
56  
57  
58  
59  
60

1  
2  
3 **PREVALENCE AND CORRELATES OF ALCOHOL AND TOBACCO USE AMONG KEY**  
4 **POPULATIONS IN TOGO IN 2017: A CROSS-SECTIONAL STUDY**  
5  
6  
7

8 Alexandra M BITTY-ANDERSON<sup>1</sup>, Fifonsi A GBEASOR-KOMLANVI<sup>2,3</sup>, Pascal JOHNSON<sup>3</sup>  
9 Essèboè K SEWU<sup>3</sup>, Claver A DAGNRA<sup>4</sup>, Mounerou SALOU<sup>4</sup>, Tetouyaba J BLATOME<sup>3</sup>, Antoine  
10 JAQUET<sup>5,6</sup>, Patrick A COFFIE<sup>6,7,8</sup>, Didier K EKOUEVI<sup>1,2,3,5,6</sup>, §  
11  
12  
13  
14

- 15 1. Programme PACCI – Site ANRS Côte d’Ivoire, CHU de Treichville, Abidjan, Côte d’Ivoire
- 16
- 17
- 18 2. Université de Lomé, Faculté des Sciences de la Santé, Département de Santé Publique, Lomé, Togo
- 19
- 20
- 21 3. Centre Africain de Recherches en Epidémiologie et en Santé Publique (CARESP), Lomé, Togo
- 22
- 23
- 24 4. Université de Lomé, Laboratoire de Biologie Moléculaire, Département des Sciences
- 25 Fondamentales, Lomé, Togo
- 26
- 27
- 28
- 29 5. INSERM U1219, Bordeaux Population Health Research, ISPED, Université de Bordeaux,
- 30 Bordeaux, France
- 31
- 32
- 33 6. Université de Bordeaux, Institut de Santé Publique Epidémiologie Développement (ISPED),
- 34 Bordeaux, France
- 35
- 36
- 37 7. Université Félix Houphouët Boigny, Département de Dermatologie et d’Infectiologie, UFR des
- 38 Sciences Médicales, Abidjan, Côte d’Ivoire
- 39
- 40
- 41
- 42
- 43 8. CHU de Treichville, Service de maladies infectieuses et tropicales, Abidjan, Côte d’Ivoire
- 44
- 45
- 46
- 47

48 **\*Word Count** (excluding title page, abstract, references, figures and tables): 4,112

49 **§ Corresponding Author:**

50 Didier Koumavi EKOUEVI, MD, PhD

51 Université de Lomé (Togo)

52 Faculté des Sciences de la Santé

53 Département de Santé Publique

54 Cell: +228 93136655

55 Email: [didier.ekouevi@gmail.com](mailto:didier.ekouevi@gmail.com)  
56  
57  
58  
59  
60

## Abstract

### Objectives

The aim of this study was to estimate alcohol and tobacco use prevalence and their correlates among female sex workers (FSW), males who have sex with males (MSM) and drug users (DU) in Togo.

### Design, setting and participants

A cross-sectional bio-behavioral study was conducted among 2,115 MSM, FSW and DU in 2017 using a respondent-driven sampling (RDS) method, in the eight biggest towns of Togo. Selection criteria for the MSM were being male and having had oral or anal intercourse with a man in the previous 12 months; for FSW, being a female and having exchanged sex for money in the previous 12 months; and for DU, consuming heroin, cocaine or hashish for MSM, FSW and DU, respectively. All participants had to be at least 18 years old and residing in the territory for the past three months.

### Results

The prevalence of alcohol consumption, hazardous/harmful consumption and binge drinking was 64.8%, 38.4%, and 45.5%, respectively. Current tobacco use was reported by 30.6% of participants and HIV prevalence was estimated at 12.5%. DU were more likely to engage in binge drinking compared to other key populations (aOR=2.0; 95% CI = [1.4-2.8]; p= 0.001). Participants who were identified as having hazardous/harmful alcohol consumption had almost three times the odds of tobacco consumption than those with no risky consumption (aOR=2.6; 95% CI= [2.0-3.4]; p=0.001). Hazardous/harmful alcohol consumption was three times more likely among participants with severe psychological distress compared to those with no psychological distress (aOR= 3.3, 95% CI= [2.2 – 5.1]; p=0.001).

### Conclusion

Findings from this study demonstrate the need for the integration of mental health and substance abuse reduction interventions into HIV prevention programs, particularly those geared toward key populations.

**Key words:** Alcohol, tobacco, HIV, key populations, Sub-Saharan Africa.



### Strengths and limitations of this study

- This study is among the first in sub-Saharan Africa exploring the patterns of alcohol and tobacco consumption among the three main groups of key populations
- This study had a consistent sample size
- The use of internationally validated instruments to assess alcohol and tobacco consumption, as well as psychological distress minimized bias
- The main limitation of our study is that it was based on self-reported data which could be a potential source of recall bias or social desirability bias

For peer review only

## Introduction

Sub-Saharan Africa (SSA) is the region of the World the most affected by the HIV/AIDS epidemic: with only 12% of the global population, SSA accounts for an estimated 71% of the world's burden of HIV infection and 74% of world's AIDS-related deaths (1). In West and Central Africa, the HIV epidemic is described as generalized and driven by heterosexual sex with an estimated prevalence of 2.2% (1). However, in key populations, populations at higher risk of HIV such as sex workers, men who have sex with men (MSM) and injection drug users, the reported prevalence rates are disproportionately high compared to those of the general population (2,3). In Togo, HIV prevalence among key populations ranges from 11% to 13% compared to 2.1% in the general population (4). Several biological, behavioral and structural risk factors are associated with this high HIV rate among key populations: unprotected sex, presence of other Sexually Transmitted Infections (STIs), lack of access to condoms, multiple concurrent sex partners (males and females for MSM), lack of access to health care and prevention services, physical and sexual violence, challenging legal and sociopolitical environment, poverty, sociopolitical stigma and discrimination (2,3).

Other risk factors associated with sexual risk behaviors and thus contributing to HIV transmission include alcohol and tobacco consumption. Alcohol, a psychoactive substance with dependence-producing properties, has been an integral part of many cultures for several centuries (5). The harmful use of alcohol and its consequences make its consumption a public health problem. More than 200 disease and injury conditions including alcohol dependence, liver cirrhosis, cancers and injuries are the consequences of the harmful use of alcohol (5). In 2012, it was reported that 5.9% of all global deaths and 5.1% of the global burden of disease and injury were the consequences of harmful alcohol consumption (5). Recent research studies have also uncovered a causal relationship between the harmful use of alcohol and infectious diseases, including HIV (5–7). This relation could be attributed to the fact that alcohol influences cognitive abilities and decision making, and affects condom negotiation and correct condom use (8). Among key populations, particularly sex workers, alcohol consumption is seen as a sexual enhancer and work requirement which in many cases leads to an increased likelihood of unprotected sex, economic loss, interference with family responsibilities and sexual violence (7,9,10).

Tobacco consumption is also one of the biggest public health challenges of the 21<sup>st</sup> century, with a clear, causal link between tobacco use and health. It is estimated that tobacco use kills half of its users and is responsible for the death of more than 7 million people a year. Approximately 80% of tobacco users live in low and middle income countries (11). Tobacco use is one the main risk factors for lung cancer, disability and death from non-communicable chronic diseases, and also an increased risk of death from communicable diseases (12,13). For people living with HIV, tobacco use is a risk factor for HIV-related comorbidities and premature death (14). Estimates in Togo put the prevalence of alcohol and tobacco consumption at 53.7% and 8.5% respectively, in the general population (15).

1  
2  
3  
4 Both alcohol and tobacco consumption play an important role in the HIV epidemic in SSA. With key  
5 populations being an important catalyst of the HIV epidemic in SSA and particularly in West Africa, it  
6 is important that patterns of alcohol and tobacco consumption be explored among these populations.  
7  
8 However, there is a dearth of data on the consumption of addictive substances such as tobacco and  
9 alcohol among the three main key populations in SSA. Of the few studies on key populations completed  
10 in Togo, none has explored alcohol and tobacco consumption and very few studies in West Africa have  
11 explored alcohol and tobacco consumption across the three key populations. The aim of this study was  
12 to estimate the prevalence of alcohol and tobacco consumption and to assess their correlates among  
13 female sex workers (FSW), MSM and drug users (DU) in Togo.  
14  
15  
16  
17  
18  
19  
20  
21  
22  
23  
24  
25  
26  
27  
28  
29  
30  
31  
32  
33  
34  
35  
36  
37  
38  
39  
40  
41  
42  
43  
44  
45  
46  
47  
48  
49  
50  
51  
52  
53  
54  
55  
56  
57  
58  
59  
60

## Methods

### Study design, sampling and recruitment

This study was a bio-behavioral cross-sectional study conducted from August to September 2017 in Togo. Togo is a country of West Africa, with a population of 7.6 million inhabitants in 2018, covering 57,000 square kilometres with an average density of 133 inhabitants per square kilometres, an infant mortality of 45.2/ 1,000 and an estimated life expectancy of 64.5 years old. The HIV prevalence in Togo is estimated at 2.1%, with a high prevalence among key population groups (4). Togo is divided into five regions and in each region, based on the mapping and size estimation studies previously carried out in Togo (16), towns with the highest number of key populations were selected: Dapaong in the Savanes region; Kara in Kara region; Sokodé in the Centrale region; Atakpamé and Kpalimé in the Plateaux region and Tsévié, Aného and Lomé, the capital city in the Maritime region. Prior to the study, locations (associations and hot spots) specific to each group of key population were identified during preliminary visits with the help of leaders from these communities. DU and FSW were recruited in drug-dealing/consumption locations and brothels (licensed or not), respectively. MSM were recruited using a Respondent Driven Sampling (RDS) method (17,18). MSM community leaders were the first “seeds”. A total of 28 seeds were identified at first based on their roles in their community and on their representativeness. Each seed from the first wave selected had to represent at least one MSM sub-group, based on how MSM self-identify as bisexuals or gays (19,20). Each participant was then given three coupons with a unique identification code to recruit three other seeds in their network until the required sample size for each group was reached. Inclusion criteria for the three groups were being 18 years or older, living/working/studying in Togo for a minimum of 3 months at the time of the study, and being in possession of a recruitment coupon. In addition to these criteria, criteria specific to MSM were having had anal and/or oral sex with a man in the previous 12 months, for FSW having had sex in exchange for money as a compensation in the previous 12 months and for DU, consuming heroin, cocaine or hashish at the time of the study.

### Sample size estimation

The sample size estimation was based on the estimated prevalence of hazardous alcohol drinking among key populations of 9.1% (21). We also took into account the prevalence of tobacco use, with the assumption that tobacco use prevalence in the key populations would be twice that of the general population. Hence, with a tobacco use prevalence of 6.8% in the general population, the expected prevalence of tobacco use among key populations was 13.6% (15). With a precision of 3% and an assumption of 10% of missing data, the minimum sample size was estimated at 552 participants per group at a minimum. Thus, to allow a comparison between groups, the total sample size estimated for the three groups of key populations was 1,656.

## Study procedures

After eligibility screening and written informed consent approval, trained study staff administered a structured and standardized questionnaire during a face-to-face interview. The questionnaire was constructed based on validated tools such as the Alcohol Use Disorders Identification Test (AUDIT) (22) and a subset of the Tobacco Questions for Surveys (23) to assess alcohol and tobacco consumption respectively. The Kessler Psychological Distress Scale (K10) (24) was used to measure psychological distress and the Family Health International (FHI) 360 validated guide for bio-behavioral surveys (25) was adapted to collect information on socio-demographic characteristics, risky sexual behaviors, STIs, HIV prevention methods, HIV testing history, access to health care services, and HIV knowledge. The questionnaires were used across the three populations with slight adaptations depending on the population.

## Scores and operational definitions

The AUDIT was used to assess alcohol consumption. The AUDIT is a set of 10-item standardized screening instrument measuring self-reported alcohol use in the past 12 months, alcohol dependence symptoms, and alcohol-related problems to screen for excessive drinking. Each question of the AUDIT can obtain a score from zero (0) to four (4). A score  $\geq 8$  for men and  $\geq 7$  for women indicates hazardous/harmful drinking, while a score of 0 indicates a non-drinker; moderate alcohol use lies in-between (22,26,27). Binge drinking or heavy episodic drinking was defined as the consumption of six or more alcohol drinks on at least one occasion in the past 30 days (third item of the AUDIT) (22).

Tobacco use was assessed using six questions indicating participants' smoking habits, frequency of smoking, history of smoking, type of products smoked and attempts at stopping to smoke (23).

The Kessler Psychological Distress Scale (K10) was used to measure psychological distress. This scale has been examined and validated among several populations and aims at measuring anxiety and depression with a 10-item questionnaire, each question pertaining to an emotional state and a five-level response scale for each response. The score obtained from the scale allows to categorize participants into four categories of psychological distress: severe (score  $\geq 30$ ), moderate (score: 25-29), mild (score: 20-24) and none (score  $< 20$ ) (28).

## Laboratory testing

Written informed consent was obtained prior to blood sample collection. Among the 2,115 key populations recruited for the study, 91.8% gave their written informed consent for blood sample collection. Blood samples were collected to test for HIV and Syphilis using SD Biolane Duo® (Abbott, Santa Clara, CA, USA). Each HIV positive test was confirmed with another HIV rapid test, the First Response® HIV 1-2-O Card Test (Premier Medical Corporation Pvt. Ltd., Maharashtra, India). In case

of discordant results, samples were tested with the INNO-LIA® HIV I/II Score (20T) (Fujirebio, Göteborg, Sweden) line immunoassay. All biological tests analyses were completed in the main HIV laboratory research unit, the Molecular Biology Laboratory (BIOLIM) at the University of Lomé.

### Statistical analysis

Descriptive statistics were performed and results were presented with frequency tabulations and percentages. Prevalences were estimated with their 95% confidence interval (95%CI). Univariate and multivariate logistic regression were performed to identify factors associated with: i) hazardous/harmful alcohol consumption, ii) binge drinking and iii) current tobacco consumption. For model building, characteristics that had a p-value <0.20 in univariate analysis were considered for the full multivariable models, which were then finalized using a stepwise, backward elimination approach. The three models did not include the variable “sex” as the four groups were already categorized according to sex. All analyses were performed using R® software.

### Ethical consideration

This study was approved by the “Comité de Bioéthique pour la Recherche en Santé (CBRS)” (Bioethics Committee for Health Research) from the Togo Ministry of Health. Participants provided written consent prior to participation. Potential participants were told about the study purpose and procedures, potential risks and protections, and compensation. Informed consent was documented with signed consent forms.

### Patient and Public Involvement

Members of key populations were involved during the study design and data collection phases of the study. They were consulted prior to the study for their input on the best method to reach out to key populations and they were actively involved in the recruitment process.

## Results

### Socio-demographic characteristics

A total of 641 MSM, 537 DU and 937 FSW, with a median age of 25 years, interquartile range (IQR) [21-32 years] participated in the study. The majority of the sample (n=1,443; 54.0%) had a secondary school education level and 76.7% were Christians (n=1,621). Approximately two-thirds of the sample (n=1,278; 60.4%) were likely to not have any psychological distress and 6.4% (n=136) were identified as having severe psychological distress, the highest among DU (n=68; 12.7 %). The HIV prevalence was 12.5% across the three populations, with the highest prevalence among MSM (20.4%). Study participants were informed of their blood test results by trained health professionals from HIV clinics. Newly diagnosed HIV positive patients were referred to an HIV clinic for HIV treatment and care. Socio-demographic and health characteristics are summarized in Table 1.

### Alcohol and tobacco consumption

Alcohol and tobacco consumption patterns are presented in Table 2. Overall, the prevalence of alcohol consumption among the three groups was 64.8%. Most participants were identified as having a hazardous/harmful alcohol consumption (n=813; 38.4%), with the highest proportion among DU (62.4% among DU; 36.7% among FSW; and 20.9% among MSM;  $p < 0.001$ ). More than a quarter of FSW (n=275; 29.4%) were moderate drinkers. The MSM subgroup had the highest proportion of non-drinkers (n=338; 52.7%), followed by FSW (n=318; 33.9%). The overall prevalence of binge drinking was 45.5% and was the highest among DU (67.0%) (Table 2).

The prevalence of tobacco consumption was 30.6% among the three groups. DU had the highest proportion of smokers (80.8%). The highest proportion of non-smokers were FSW (n=821; 87.6%), followed by MSM (n=544, 84.9%). Of the people who smoked, 63.1% were smoking every day, including 79.0% of DU, 42.2% of FSW and 16.5% of MSM.

### Factors associated with alcohol consumption

Table 3 reports the results of the multivariable logistic regression model which describes the association between the independent variables and the hazardous/harmful consumption of alcohol and binge drinking. The odds of hazardous/harmful alcohol consumption were significantly higher among non-believers or other (aOR=0.7; 95% CI= [0.5-0.9];  $p = 0.001$ ) than among Muslims (aOR= 0.4; 95% CI [0.3-0.6];  $p = 0.001$ ) and Christians (aOR=0.7; 95% CI= [0.5-0.9];  $p = 0.001$ ). FSW (aOR=1.6; 95% CI= [1.3-2.1];  $p = 0.001$ ), and DU (aOR=2.0; 95% CI = [1.4-2.8];  $p = 0.001$ ) were more likely to engage in binge drinking compared to MSM. The place of residence, whether in the capital city of Lomé or in other towns, was also associated with hazardous/harmful alcohol consumption and binge drinking so that people living in other towns were almost three times more likely to have hazardous/harmful alcohol consumption (aOR=2.8; 95% CI= [2.2-3.4];  $p = 0.001$ ) or engage in binge drinking (aOR=2.5; 95% CI= [2.0-3.0];  $p = 0.001$ ) than those living in the capital city of Lomé. Psychological distress was also a risk factor for hazardous/harmful alcohol consumption and binge drinking. Participants with severe psychological distress were three times (aOR= 3.3, 95% CI= [2.2 – 5.1];  $p = 0.001$ ) and twice (aOR=2.2, 95% CI= [1.5 – 3.4];  $p = 0.001$ ) more likely to be engaged in hazardous/harmful alcohol consumption and binge drinking, respectively, than those with no psychological distress. The odds of hazardous/harmful alcohol consumption and binge drinking increased as the severity of psychological distress increased. In addition, being a DU was significantly associated with hazardous/harmful alcohol consumption and binge drinking. Compared to MSM and FSW, DU had two times the odds of hazardous/harmful alcohol consumption (aOR=2.4; 95%CI= [1.7-3.4];  $p = 0.001$ ) and two times the odds of binge drinking compared to MSM and FSW (aOR=2.0; 95%CI= [1.4 -2.8]). Finally, being 25 years old and older (aOR=1.3; 95% CI [1.1-1.6]), tobacco use (aOR=2.6; 95% CI: [2.0-3.4]), being HIV



1  
2  
3 positive (aOR=0.7; 95% CI [0.5-0.9]) were significantly associated with both hazardous/harmful alcohol  
4 consumption and binge drinking.  
5  
6

### 7 **Factors associated with tobacco use**

8  
9  
10 In multivariable analysis, living in cities other than Lomé (the capital city) (aOR=0.6; 95%CI 0.5-0.8),  
11 hazardous/harmful alcohol consumption (aOR=2.6; 95% CI 2.0-3.4), having mild (aOR=1.5; 95% CI  
12 1.1-2.1) or moderate (aOR=2.0; 95% CI 1.3-2.8) psychological distress, being a FSW (aOR=0.6; 95%  
13 0.4-0.9), and being a DU (aOR=17.9; 95% CI 12.4-26.4) were factors associated with tobacco use (Table  
14 4) .  
15  
16  
17  
18  
19  
20  
21  
22  
23  
24  
25  
26  
27  
28  
29  
30  
31  
32  
33  
34  
35  
36  
37  
38  
39  
40  
41  
42  
43  
44  
45  
46  
47  
48  
49  
50  
51  
52  
53  
54  
55  
56  
57  
58  
59  
60

For peer review only



## Discussion

The aim of this study was to assess the prevalence of hazardous/harmful, binge alcohol consumption as well as tobacco consumption, and explore correlates of heavy alcohol consumption and tobacco use in three key populations in Togo. We observed a high prevalence of hazardous/harmful alcohol consumption and binge drinking. Alcohol consumption was frequent among FSW and much more among DU. In addition, there was a dose-response effect relationship between alcohol consumption and psychological distress across all three populations. Tobacco use was highly prevalent among DU and among people who had a hazardous/harmful alcohol consumption.

Alcohol consumption is highly prevalent among key populations groups: more than half of the sample were categorized as moderate or hazardous drinkers. This has been corroborated in the literature among key population groups. In a recent study in Kenya, among 1,476 MSM, 44% of the sample had a hazardous alcohol consumption, and, no relationship was found between alcohol and tobacco consumption and HIV infection (29). In another study among 3,588 MSM in China, alcohol prevalence was 56.1% with 16.8% of them being binge drinkers and 14.4% being recent hazardous drinkers, using the WHO AUDIT-C scale (30). Recent alcohol misuse was associated with increased sexual and HIV/syphilis risks as well as sexual risk behaviors including alcohol use before sex, sex without condoms and multiple concurrent partnerships. A prospective cohort study among 1,027 FSW in Uganda found that 78% of the sample reported using alcohol with 71% admitting to using alcohol at least once a week, with a reduced prevalence of 54% after two years of intervention (31). This emphasizes the need for alcohol risk reduction programs and programs specifically focused on the adoption of safer drinking practices integrated into HIV prevention packages and geared towards highly exposed groups (30,31).

Alcohol and tobacco consumption are particularly relevant to people living with HIV (PLHIV). Studies have demonstrated a negative impact of alcohol, tobacco and drug use on life expectancy for HIV-positive patients (32). Alcohol and tobacco use have also been associated with poor adherence to antiretroviral therapy (ART) and the interaction between all those substances leading to a higher susceptibility to co-morbidities, opportunistic infections such as tuberculosis (TB) (33,34). In this study, hazardous/harmful alcohol consumption and binge drinking were both significantly associated with tobacco use (33). This indicates the need for targeted prevention actions such as smoking cessation treatment and alcohol reducing counseling, among key populations, particularly among key populations living with HIV. A systematic review of interventions to reduce alcohol use among MSM indicated that although interventions such as motivational interviewing appear to be effective among MSM, they are scarce (35).

Psychological distress was found to have a dose-response relationship with alcohol consumption. Severe psychological distress was at least twice higher among people with a hazardous/harmful alcohol

1  
2  
3 consumption and people who were binge drinking. This is consistent with other studies that found a  
4 relationship between alcohol and drug abuse and psychological symptoms such as depression, anxiety  
5 and suicidal ideation among key populations (29,36,37). Consistent with our findings, a study conducted  
6 in Cambodia among MSM found that 38.8% had severe psychological distress and that severe  
7 psychological distress was associated with alcohol and drug use, poor self-reported quality of life and  
8 reduced condom use at last sex (36). In southern India, a study among FSW found a significant  
9 relationship between major depression and alcohol use (38). Another study among PLHIV in Uganda  
10 found that psychological distress was significantly associated with non-adherence to ART (39). This has  
11 implication for HIV prevention and further demonstrates the need for integrated services of mental  
12 health interventions, psychological support as well as substance abuse reduction program into HIV  
13 prevention programs. In fact, in Togo, the current policy on HIV prevention and care ensures access to  
14 HIV prevention and treatment services with the integration of Sexual and Reproductive Services and  
15 HIV care services for all citizens including key populations, but mental health interventions are not yet  
16 a component of the basic health services package. This would also imply that health care workers be  
17 sufficiently armed through sufficient and adequate training to screen and refer key populations in need  
18 of those interventions.  
19

20  
21  
22 Very few studies have explored alcohol and tobacco consumption patterns among the three main key  
23 populations. This study found quite different patterns of consumption among the three groups, with  
24 MSM in this sample being the lowest at-risk group for hazardous/harmful alcohol consumption, binge  
25 drinking and tobacco use. DU on the other hand, appear to be most vulnerable to hazardous/harmful  
26 alcohol consumption, binge drinking and tobacco use, as well as the group with the highest prevalence  
27 of severe psychological distress. This could potentially indicate that there is a difference in coping  
28 strategies for key populations and that, behavioral interventions specifically geared towards MSM have  
29 elements that perhaps have successfully enhanced their capacity to cope with the stress among the most  
30 marginalized groups. For example, studies have demonstrated the effectiveness of community-based  
31 organizations (CBOs), peer-led interventions and community engagement in HIV prevention among  
32 MSM (40–42). It is important that targeted interventions be geared toward generating an interest for  
33 community building among DU.  
34

35  
36  
37 Strengths of this study include the large sample size of the three main types of key populations. In  
38 addition, to our knowledge, this is the first study in Togo comparing alcohol and tobacco consumption  
39 in these key populations using standardized tools (AUDIT, Tobacco Questions for Surveys, and Kessler  
40 psychological distress scale). Finally, this study was completed in the eight main cities of Togo and used  
41 geographical mapping as well as RDS sampling, which could indicate that the findings of this study to  
42 reflect the national prevalence of alcohol and tobacco consumption among key populations.  
43  
44  
45  
46  
47  
48  
49  
50  
51  
52  
53  
54  
55  
56  
57  
58  
59  
60

1  
2  
3 However, there were few limitations including the fact that some variables such as childhood abuse,  
4 stigma, or recent trauma which could influence alcohol and tobacco consumption, have not been  
5 collected. Interactions between the different groups of key populations (i.e., DUs engaging in sex work,  
6 MSM who engage in sex work, sex workers who are also MSM) were also not collected. Furthermore,  
7 self-reported data used in this study, are prone to social desirability and recall bias. Despite these  
8 limitations, the results presented in this study make a unique contribution to the literature on alcohol and  
9 tobacco use among key populations in West Africa, especially since Togo shares similar characteristics  
10 with other countries of West Africa regarding the HIV epidemic (concentrated HIV epidemics with  
11 elevated HIV prevalences among key populations), access to treatment and prevention for key  
12 populations (3,43). The results could be generalized to other countries in West Africa.

13  
14  
15 Further research could further explore the relationship between alcohol, tobacco, depression and sexual  
16 risk behaviors and HIV infection among key populations. Qualitative studies could also explore the  
17 reasons for high alcohol and tobacco consumption among key populations.

### 24 25 **Conclusion**

26  
27 Alcohol and tobacco use and abuse are highly prevalent among key populations. Psychological distress  
28 and being a DU were both significantly associated with alcohol and tobacco consumption. There is a  
29 need for mental health and substance abuse screening, referral and treatment to be addressed and fully  
30 integrated into HIV prevention services for key populations. Further research is also needed to explore,  
31 through qualitative and quantitative designs, the consequences and impact of alcohol and tobacco  
32 consumption, as well as mental health issues such as psychological distress on individuals and its burden  
33 in the HIV epidemic.  
34  
35  
36  
37  
38  
39  
40  
41  
42  
43  
44  
45  
46  
47  
48  
49  
50  
51  
52  
53  
54  
55  
56  
57  
58  
59  
60

**Author contributorship**

ABA and FGK contributed equally to this paper. ABA, FGK, PAC and DKE conceived and designed the study with inputs from AJ. PJ, EKS, CAD, MS and TJB facilitated data collection and contributed to analysis of the data. ABA and FGK analyzed, interpreted the data and drafted the manuscript. PAC, AJ and DKE revised the manuscript for important intellectual content. All authors participated in the revision process and have approved the final version of the manuscript.

**Competing interests**

No competing interests to declare

**Funding**

This work was supported by the « Centre Africain de Recherche en Epidémiologie et en Santé Publique (CARESP) » (African Center for Epidemiology and Public Health Research) and the Togo National HIV/AIDS and STI Control Program.

**Data sharing statement**

No additional data are available

**Ethics approval and consent to participate**

This study was reviewed and approved by the Bioethics Committee for Research in Health in Togo (CBRS No. 18/2017/CBRS of June 22 2017). Consent was obtained from each participant prior to administering the survey questions.

## References

1. Kharsany ABM, Karim QA. HIV Infection and AIDS in Sub-Saharan Africa: Current Status, Challenges and Opportunities. *Open AIDS J*. 2016 Apr 8;10:34–48.
2. Djomand G, Quaye S, Sullivan PS. HIV epidemic among key populations in west Africa. *Curr Opin HIV AIDS*. 2014 Sep;9(5):506–13.
3. HIV and AIDS in West and Central Africa Overview [Internet]. AVERT. 2017 [cited 2018 Jul 19]. Available from: <https://www.avert.org/hiv-and-aids-west-and-central-africa-overview>
4. Joint United Nations Programme on HIV/AIDS (UNAIDS). Togo [Internet]. [cited 2018 Jul 19]. Available from: <http://www.unaids.org/en/regionscountries/countries/togo>
5. World Health Organization (WHO). Global status report on alcohol and health, 2018 [Internet]. 2018 [cited 2018 Oct 10]. Available from: [http://www.who.int/substance\\_abuse/publications/global\\_alcohol\\_report/gsr\\_2018/en/](http://www.who.int/substance_abuse/publications/global_alcohol_report/gsr_2018/en/)
6. Lama TP, Kumoji E 'Kuor, Ketlogetswe D, Anderson M, Brahmabhatt H. Alcohol Consumption and Risky Sexual Behavior Among Persons Attending Alcohol Consumption Venues in Gaborone, Botswana. *Prev Sci Off J Soc Prev Res*. 2016 Feb;17(2):227–36.
7. Sileo KM, Kintu M, Chanes-Mora P, Kiene SM. “Such Behaviors Are Not in My Home Village, I Got Them Here”: A Qualitative Study of the Influence of Contextual Factors on Alcohol and HIV Risk Behaviors in a Fishing Community on Lake Victoria, Uganda. *AIDS Behav*. 2016 Mar;20(3):537–47.
8. Chersich MF, Rees HV. Causal links between binge drinking patterns, unsafe sex and HIV in South Africa: its time to intervene. *Int J STD AIDS*. 2010 Jan;21(1):2–7.
9. Chen Y, Li X, Shen Z, Zhou Y, Tang Z. Drinking reasons and alcohol problems by work venue among female sex workers in Guangxi, China. *Subst Use Misuse*. 2015 Apr;50(5):642–52.
10. Heravian A, Solomon R, Krishnan G, Vasudevan CK, Krishnan AK, Osmand T, et al. Alcohol consumption patterns and sexual risk behavior among female sex workers in two South Indian communities. *Int J Drug Policy*. 2012 Nov;23(6):498–504.
11. Tobacco [Internet]. World Health Organization. [cited 2018 Aug 3]. Available from: <http://www.who.int/news-room/fact-sheets/detail/tobacco>
12. Commar A, Prasad VK, Tursan d'Espaignet E, Wolfenden L, Weltgesundheitsorganisation. WHO global report on trends in prevalence of tobacco smoking 2000-2025. 2018.
13. World Health Organization. WHO global report on trends in prevalence of tobacco smoking, 2015. [Internet]. 2015 [cited 2018 Aug 2]. Available from: [http://apps.who.int/iris/bitstream/10665/156262/1/9789241564922\\_eng.pdf](http://apps.who.int/iris/bitstream/10665/156262/1/9789241564922_eng.pdf)
14. Reynolds NR. Cigarette smoking and HIV: More evidence for action. *AIDS Educ Prev Off Publ Int Soc AIDS Educ*. 2009 Jun;21(3 Suppl):106–21.
15. Agoudavi K, Ministère de la Santé, Togo. Rapport Final de l'enquête STEPS Togo 2010 [Internet]. Ministère de la Santé Togo; 2012. Available from: [http://www.who.int/ncds/surveillance/steps/2010STEPS\\_Report\\_Togo\\_FR.pdf](http://www.who.int/ncds/surveillance/steps/2010STEPS_Report_Togo_FR.pdf)
16. Conseil National de Lutte contre le sida et les infections sexuellement transmissibles, République du Togo. Estimation de la taille et cartographie des sites des hommes ayant des

- 1  
2  
3 rapports sexuels avec d'autres hommes et des Professionnelles de sexe [Internet]. Republique du  
4 Togo; 2015. Available from: [http://cnlstogo.org/download/cartographies/Rapport-Estimation-de-](http://cnlstogo.org/download/cartographies/Rapport-Estimation-de-la-taille-et-cartographie-HSH-et-PS-Togo_30_06_15-OK.pdf)  
5 [la-taille-et-cartographie-HSH-et-PS-Togo\\_30\\_06\\_15-OK.pdf](http://cnlstogo.org/download/cartographies/Rapport-Estimation-de-la-taille-et-cartographie-HSH-et-PS-Togo_30_06_15-OK.pdf)  
6
- 7 17. Malekinejad M, Johnston L, Kendall C, Kerr L, Rifkin M, Rutherford G. Using respondent-  
8 driven sampling methodology for HIV biological and behavioral surveillance in international  
9 settings: a systematic review. *AIDS Behav.* 2008;12(4 Suppl):S105-30.  
10
- 11 18. Heckathorn D. Respondent-drive sampling: A new approach to the study of hidden populations.  
12 *Soc Probl.* 1997;44(2):174-99.  
13
- 14 19. Cáceres CF, Aggleton P, Galea JT. Sexual diversity, social inclusion and HIV/AIDS. *AIDS*  
15 *Lond Engl.* 2008 Aug;22(Suppl 2):S45-55.  
16
- 17 20. Ross MW, Kajubi P, Mandel JS, McFarland W, Raymond HF. Internalized  
18 homonegativity/homophobia is associated with HIV-risk behaviours among Ugandan gay and  
19 bisexual men. *Int J STD AIDS.* 2013 May;24(5):409-13.  
20
- 21 21. Jaquet A, Nouaman M, Tine J, Tanon A, Anoma C, Inwoley A, et al. Hepatitis B treatment  
22 eligibility in West Africa: uncertainties and need for prospective cohort studies. *Liver Int Off J*  
23 *Int Assoc Study Liver.* 2017 Aug;37(8):1116.  
24
- 25 22. Babor TF, Higgins-Biddle JC, Saunders JB, Monteiro MG. The Alcohol Use Disorders  
26 Identification Test: Guidelines for Use in Primary Care [Internet]. World Health Organization  
27 (WHO); p. 41. Available from:  
28 [http://apps.who.int/iris/bitstream/handle/10665/67205/WHO\\_MSD\\_MSB\\_01.6a.pdf;jsessionid=](http://apps.who.int/iris/bitstream/handle/10665/67205/WHO_MSD_MSB_01.6a.pdf;jsessionid=3743A977A779D807D1894679A3E91DD3?sequence=1)  
29 [3743A977A779D807D1894679A3E91DD3?sequence=1](http://apps.who.int/iris/bitstream/handle/10665/67205/WHO_MSD_MSB_01.6a.pdf;jsessionid=3743A977A779D807D1894679A3E91DD3?sequence=1)  
30  
31
- 32 23. Global Adult Tobacco Survey Collaborative Group, Centers for Disease Control and Prevention  
33 (CDC). Tobacco Questions for Surveys: A subset of key questions for the Global Adult Tobacco  
34 Survey (GATS) [Internet]. Atlanta, Georgia: Centers for Disease Control and Prevention; 2011.  
35 Available from: [http://www.who.int/tobacco/surveillance/en\\_tfi\\_tqs.pdf](http://www.who.int/tobacco/surveillance/en_tfi_tqs.pdf)  
36
- 37 24. Kessler RC, Andrews G, Colpe LJ, Hiripi E, Mroczek DK, Normand SLT, et al. Short screening  
38 scales to monitor population prevalences and trends in non-specific psychological distress.  
39 *Psychol Med.* 2002 Aug;32(6):959-76.  
40
- 41 25. Amon J, Brown T, Hogle J, MacNeil J, Magnani R, Mills S, et al. Guidelines for repeated  
42 behavioral surveys in populations at risk of HIV. :358.  
43
- 44 26. Foxcroft DR, Smith LA, Thomas H, Howcutt S. Accuracy of Alcohol Use Disorders  
45 Identification Test for detecting problem drinking in 18-35 year-olds in England: method  
46 comparison study. *Alcohol Alcohol Oxf Oxf.* 2015 Mar;50(2):244-50.  
47
- 48 27. Gache P, Michaud P, Landry U, Accietto C, Arfaoui S, Wenger O, et al. The Alcohol Use  
49 Disorders Identification Test (AUDIT) as a screening tool for excessive drinking in primary  
50 care: reliability and validity of a French version. *Alcohol Clin Exp Res.* 2005 Nov;29(11):2001-  
51 7.  
52
- 53 28. Andrews G, Slade T. Interpreting scores on the Kessler Psychological Distress Scale (K10). *Aust*  
54 *N Z J Public Health.* 2001 Dec;25(6):494-7.  
55
- 56 29. Korhonen C, Kimani M, Wahome E, Otieno F, Okall D, Bailey RC, et al. Depressive symptoms  
57 and problematic alcohol and other substance use in 1476 gay, bisexual, and other MSM at three  
58 research sites in Kenya. *AIDS Lond Engl.* 2018 Jul 17;32(11):1507-15.  
59  
60



- 1
- 2
- 3 30. Liu Y, Ruan Y, Strauss SM, Yin L, Liu H, Amico KR, et al. Alcohol misuse, risky sexual
- 4 behaviors, and HIV or syphilis infections among Chinese men who have sex with men. *Drug*
- 5 *Alcohol Depend.* 2016 Nov 1;168:239–46.
- 6
- 7 31. Weiss HA, Vandepitte J, Bukonya JN, Mayanja Y, Nakubulwa S, Kamali A, et al. High Levels
- 8 of Persistent Problem Drinking in Women at High Risk for HIV in Kampala, Uganda: A
- 9 Prospective Cohort Study. *Int J Environ Res Public Health* [Internet]. 2016 Feb [cited 2018 Sep
- 10 20];13(2). Available from: <https://www.ncbi.nlm.nih.gov/pmc/articles/PMC4772173/>
- 11
- 12 32. Petoumenos K, Law MG. Smoking, alcohol and illicit drug use effects on survival in HIV-
- 13 positive persons. *Curr Opin HIV AIDS.* 2016;11(5):514–20.
- 14
- 15 33. Jaquet A, Ekouevi D-K, Aboubakrine M, Bashi J, Messou E, Maiga M, et al. Tobacco use and its
- 16 determinants in HIV-infected patients on antiretroviral therapy in West African countries. *Int J*
- 17 *Tuberc Lung Dis.* 2009 Nov;13(11):1433–9.
- 18
- 19 34. Schneider M, Chersich M, Temmerman M, Degomme O, Parry CD. The impact of alcohol on
- 20 HIV prevention and treatment for South Africans in primary healthcare. *Curationis.* 2014 Aug
- 21 1;37(1):1137.
- 22
- 23 35. Wray TB, Grin B, Dorfman L, Glynn TR, Kahler C. Systematic Review of Interventions to
- 24 Reduce Problematic Alcohol Use in Men who have Sex with Men. *Drug Alcohol Rev.*
- 25 2016;35(2):148–57.
- 26
- 27 36. Yi S, Tuot S, Chhoun P, Pal K, Choub SC, Mburu G. Mental health among men who have sex
- 28 with men in Cambodia: Implications for integration of mental health services within HIV
- 29 programmes. *Int J Equity Health.* 2016 Mar 24;15:53.
- 30
- 31 37. Stoloff K, Joska JA, Feast D, De Swardt G, Hugo J, Struthers H, et al. A description of common
- 32 mental disorders in men who have sex with men (MSM) referred for assessment and intervention
- 33 at an MSM clinic in Cape Town, South Africa. *AIDS Behav.* 2013 May;17 Suppl 1:S77-81.
- 34
- 35 38. Patel S, Saggurti N, Pachauri S, Prabhakar P. Correlates of Mental Depression Among Female
- 36 Sex Workers in Southern India. *Asia Pac J Public Health.* 2015;27(8):809–19.
- 37
- 38 39. Nakimuli-Mpungu E, Mutamba B, Othengo M, Musisi S. Psychological distress and adherence
- 39 to highly active anti-retroviral therapy (HAART) in Uganda: A pilot study. *Afr Health Sci.* 2009
- 40 Aug 1;9(Suppl 1):S2–7.
- 41
- 42 40. Ye S, et al. Efficacy of peer-led interventions to reduce unprotected anal intercourse among men
- 43 who have sex with men: a meta-analysis. - PubMed - NCBI. *PLOS ONE* [Internet]. 2014 [cited
- 44 2018 Nov 5];9(3). Available from: <https://www.ncbi.nlm.nih.gov/pubmed/24614809>
- 45
- 46 41. Shangani S, et al. Effectiveness of peer-led interventions to increase HIV testing among men
- 47 who have sex with men: a systematic review and meta-analysis. - PubMed - NCBI. *AIDS Care*
- 48 [Internet]. 2017 [cited 2018 Nov 5];29(8). Available from:
- 49 <https://www.ncbi.nlm.nih.gov/pubmed/28150501>
- 50
- 51 42. Chuang D, Lacombe-Duncan A. Community engagement among men who have sex with men
- 52 living with HIV/AIDS in Taiwan. - PubMed - NCBI. *AIDS Care* [Internet]. 2016 [cited 2018
- 53 Nov 5];28(4). Available from: <https://www.ncbi.nlm.nih.gov/pubmed/26586156>
- 54
- 55 43. Joint United Nations Programme on HIV/AIDS (UNAIDS). The Western and Central Africa
- 56 Catch-up plan: Putting HIV treatment on the fast-track by 2018 [Internet]. 2017. Available from:
- 57 [https://www.unaids.org/sites/default/files/media\\_asset/WCA-catch-up-plan\\_en.pdf](https://www.unaids.org/sites/default/files/media_asset/WCA-catch-up-plan_en.pdf)
- 58
- 59
- 60

1  
2  
3  
4  
5  
6  
7  
8  
9  
10  
11  
12  
13  
14  
15  
16  
17  
18  
19  
20  
21  
22  
23  
24  
25  
26  
27  
28  
29  
30  
31  
32  
33  
34  
35  
36  
37  
38  
39  
40  
41  
42  
43  
44  
45  
46  
47  
48  
49  
50  
51  
52  
53  
54  
55  
56  
57  
58  
59  
60

For peer review only



**Table 1:** Socio-demographic and health characteristics

|                                           | <b>MSM (n=641)</b> | <b>FSW (n=937)</b> | <b>DU (n=537)</b> | <b>Total (=2115)</b> | <b>p-value</b> |
|-------------------------------------------|--------------------|--------------------|-------------------|----------------------|----------------|
|                                           | <b>n (%)</b>       | <b>n (%)</b>       | <b>n (%)</b>      | <b>n (%)</b>         |                |
| <b>Age (years)</b>                        |                    |                    |                   |                      | <0.001         |
| 18 – 25                                   | 442 (68.9)         | 456 (48.7)         | 183 (34.1)        | 1081 (51.1)          |                |
| > 25                                      | 199 (31.1)         | 481 (51.3)         | 354 (65.9)        | 1034 (48.9)          |                |
| <b>Sex</b>                                |                    |                    |                   |                      | <0.001         |
| Male                                      | 641 (100.0)        | 0 (0.0)            | 510 (95.0)        | 1151 (54.4)          |                |
| Female                                    | 0 (0.0)            | 937 (100.0)        | 27 (5.0)          | 964 (45.6)           |                |
| <b>Marital status</b>                     |                    |                    |                   |                      | <0.001         |
| Married                                   | 41 (6.4)           | 130 (13.9)         | 185 (34.5)        | 356 (16.8)           |                |
| Not married                               | 600 (93.6)         | 807 (86.1)         | 352 (65.5)        | 1759 (83.2)          |                |
| <b>Education level</b>                    |                    |                    |                   |                      | <0.001         |
| Never went to school                      | 1 (0.2)            | 158 (16.8)         | 29 (5.4)          | 188 (8.9)            |                |
| Primary school                            | 51 (7.9)           | 263 (28.1)         | 163 (30.4)        | 477 (22.6)           |                |
| Secondary school                          | 356 (55.5)         | 471 (50.3)         | 316 (58.8)        | 1143 (54.0)          |                |
| College/University                        | 233 (36.4)         | 45 (4.8)           | 29 (5.4)          | 307 (14.5)           |                |
| <b>Religion</b>                           |                    |                    |                   |                      | <0.001         |
| Other/ Non-believers                      | 65 (10.1)          | 100 (10.7)         | 98 (18.2)         | 263 (12.4)           |                |
| Christians                                | 522 (81.5)         | 743 (79.3)         | 356 (66.3)        | 1621 (76.7)          |                |
| Muslims                                   | 54 (8.4)           | 94 (10.0)          | 83 (15.5)         | 231 (10.9)           |                |
| <b>Place of residence</b>                 |                    |                    |                   |                      | <0.001         |
| Lomé                                      | 447 (69.7)         | 526 (5.1)          | 316 (58.8)        | 1289 (60.9)          |                |
| Other                                     | 194 (30.3)         | 411 (43.9)         | 221 (41.2)        | 826 (39.1)           |                |
| <b>Psychological distress</b>             |                    |                    |                   |                      | <0.001         |
| Likely not to have psychological distress | 497 (77.5)         | 538 (57.4)         | 243 (45.2)        | 1278 (60.4)          |                |

|                                                |            |            |            |             |        |
|------------------------------------------------|------------|------------|------------|-------------|--------|
| Likely to have mild psychological distress     | 80 (12.5)  | 223 (23.8) | 123 (22.9) | 426 (20.1)  |        |
| Likely to have moderate psychological distress | 55 (8.6)   | 117 (12.5) | 103 (19.2) | 275 (13.0)  |        |
| Likely to have severe psychological distress   | 9 (1.4)    | 59 (6.3)   | 68 (12.7)  | 136 (6.5)   |        |
| <b>HIV Infection</b>                           |            |            |            |             | <0.001 |
| Yes                                            | 131 (20.4) | 119 (12.7) | 15 (2.8)   | 265 (12.5)  |        |
| No                                             | 480 (74.9) | 787 (84.0) | 410 (76.3) | 1677 (79.3) |        |
| Not tested                                     | 30 (4.7)   | 31 (3.3)   | 112 (20.9) | 173 (8.2)   |        |

For peer review only

1  
2  
3  
4  
5  
6  
7  
8  
9  
10  
11  
12  
13  
14  
15  
16  
17  
18  
19  
20  
21  
22  
23  
24  
25  
26  
27  
28  
29  
30  
31  
32  
33  
34  
35  
36  
37  
38  
39  
40  
41  
42  
43  
44  
45  
46

For peer review only

| <b>Addictive behaviour</b> | <b>MSM (n= 641)</b> | <b>FSW(n=937)</b> | <b>DU (n=537)</b> | <b>Total (N=2115)</b> | <b>p-value</b> |
|----------------------------|---------------------|-------------------|-------------------|-----------------------|----------------|
|----------------------------|---------------------|-------------------|-------------------|-----------------------|----------------|

1  
2  
3  
4  
5  
6  
7  
8  
9  
10  
11  
12  
13  
14  
15  
16  
17  
18  
19  
20  
21  
22  
23  
24  
25  
26  
27  
28  
29  
30  
31  
32  
33  
34  
35  
36  
37  
38  
39  
40  
41  
42  
43  
44  
45  
46

|                                                    | n (%)             | n (%)             | n (%)             | N (%)             |
|----------------------------------------------------|-------------------|-------------------|-------------------|-------------------|
| <b>Alcohol consumption</b>                         |                   |                   |                   |                   |
| Non-drinker                                        | 338 (52.7)        | 318 (33.9)        | 88 (16.4)         | 744 (35.2)        |
| Moderate drinking <sup>1</sup>                     | 169 (26.4)        | 275 (29.4)        | 114 (21.2)        | 558 (26.4)        |
| Hazardous consumption                              | 134 (20.9)        | 344 (36.7)        | 335 (62.4)        | 813 (38.4)        |
| <b>Binge drinking<sup>2</sup> (overall)</b>        | <b>196 (30.6)</b> | <b>406 (43.3)</b> | <b>360 (67.0)</b> | <b>962 (45.5)</b> |
| <b>Binge drinking<sup>2</sup> (among drinkers)</b> | <b>196 (64.7)</b> | <b>406 (65.6)</b> | <b>360 (80.2)</b> | <b>962 (70.2)</b> |
| <b>Tobacco Use</b>                                 |                   |                   |                   |                   |
| Yes                                                | 97 (15.1)         | 116 (12.4)        | 434 (80.8)        | 647 (30.6)        |
| <i>Everyday</i>                                    | 16 (16.5)         | 49 (42.2)         | 343 (79.0)        | 408 (63.1)        |
| No                                                 | 544 (84.9)        | 821 (87.6)        | 103 (19.2)        | 1468 (69.4)       |

<0.001

<0.001

**Table 2:**  
Alcohol and  
Tobacco  
consumption  
patterns  
among key  
populations in  
Togo in 2017

FSW: female sex worker; MSM: Men who have sex with men; DU: Drug user

<sup>1</sup>: Moderate drinking levels depend on sex (differences in metabolism for females and males); AUDIT score: 1-6 for females and AUDIT score: 1- 7 for males

<sup>2</sup>: Binge drinking is defined as the consumption of six or more alcohol drinks at least once per month in one occasion (Question 3 of the AUDIT)

**Table 3:** Factors associated with hazardous alcohol consumption and binge drinking among key populations in Togo in 2017

|                        | Hazardous/harmful alcohol consumption |               |         |                       |             | Binge drinking      |               |              |                       |             |
|------------------------|---------------------------------------|---------------|---------|-----------------------|-------------|---------------------|---------------|--------------|-----------------------|-------------|
|                        | Univariate analysis                   |               |         | Multivariate analysis |             | Univariate analysis |               |              | Multivariate analysis |             |
|                        | n/N                                   | OR (95% CI)   | p-value | aOR (95% CI)          | p-value     | n/N                 | OR (95% CI)   | p-value      | aOR (95% CI)          | p-value     |
| <b>Age (years)</b>     |                                       |               |         |                       | <b>0.05</b> |                     |               |              |                       | <b>0.05</b> |
| 18 – 25                | 351/1081                              | 1             |         | 1                     |             | 433/1081            | 1             |              | 1                     |             |
| >25                    | 462/1034                              | 1.7 (1.4-2.0) | 0.001   | 1.3 (1.1-1.6)         | 0.05        | 529/1034            | 1.6 (1.3-1.9) | 0.001        | 1.3 (1.1-1.6)         | 0.01        |
| <b>Marital status</b>  |                                       |               |         |                       | 0.97        |                     |               |              |                       |             |
| Not married            | 641/1759                              | 1             |         | 1                     |             | 777/1759            | 1             |              |                       |             |
| Married                | 172/356                               | 1.6 (1.302.1) | 0.001   | 1.0 (0.8-1.3)         |             | 185/356             | 1.4 (1.1-1.7) | 0.001        |                       |             |
| <b>Education level</b> |                                       |               | 0.001   |                       | 0.19        |                     |               | <b>0.001</b> |                       | <b>0.01</b> |

|    |                                                |          |                |       |                |              |          |               |              |                |       |
|----|------------------------------------------------|----------|----------------|-------|----------------|--------------|----------|---------------|--------------|----------------|-------|
| 1  |                                                |          |                |       |                |              |          |               |              |                |       |
| 2  |                                                |          |                |       |                |              |          |               |              |                |       |
| 3  | Never been to school                           | 64/188   | 1              |       | 1              |              | 69/188   | 1             |              | 1              |       |
| 4  | Primary school                                 | 232/477  | 1.8 (1.3-2.6)  | 0.001 | 1.50 (1.0-2.2) | 0.05         | 256/477  | 2.0 (1.4-2.8) | 0.001        | 1.6 (1.1-2.4)  | 0.01  |
| 5  | Secondary school                               | 436/1143 | 1.2 (0.9-1.7)  | 0.283 | 1.3 (0.9-1.8)  | 0.26         | 517/1143 | 1.4 (1.0-2.0) | 0.05         | 1.5 (1.0-2.1)  | 0.05  |
| 6  | University                                     | 81/307   | 0.7 (0.5- 1.0) | 0.10  | 1.3 (0.8-2.2)  | 0.21         | 120/307  | 1.1 (0.8-1.6) | 0.60         | 2.1 (1.3-3.3)  | 0.01  |
| 7  |                                                |          |                |       |                |              |          |               |              |                |       |
| 8  |                                                |          |                |       |                |              |          |               |              |                |       |
| 9  |                                                |          |                |       |                |              |          |               |              |                |       |
| 10 | <b>Religion</b>                                |          |                | 0.001 |                | <b>0.001</b> |          |               | <b>0.001</b> | <b>0.001</b>   |       |
| 11 | Others/ Non-believers                          | 56/112   | 1              |       | 1              |              | 151/263  | 1             |              | 1              |       |
| 12 | Christians                                     | 596/1621 | 0.5 (0.4-0.7)  | 0.001 | 0.7 (0.5-0.9)  | 0.05         | 718/1621 | 0.6 (0.5-0.8) | 0.001        | 0.71 (0.5-1.0) | 0.05  |
| 13 | Muslims                                        | 80/231   | 0.5 (0.3-0.7)  | 0.001 | 0.4 (0.3-0.6)  | 0.001        | 93/231   | 0.5 (0.4-0.7) | 0.001        | 0.4 (0.3-0.7)  | 0.001 |
| 14 |                                                |          |                |       |                |              |          |               |              |                |       |
| 15 |                                                |          |                |       |                |              |          |               |              |                |       |
| 16 | <b>Place of residence</b>                      |          |                |       |                | <b>0.001</b> |          |               |              | <b>0.001</b>   |       |
| 17 | Lomé                                           | 392/1289 | 1              |       | 1              |              | 486/1289 | 1             |              | 1              |       |
| 18 | Others                                         | 421/826  | 2.4 (2.0-2.9)  | 0.001 | 2.8 (2.2-3.4)  | 0.001        | 476/826  | 2.3 (1.9-2.7) | 0.001        | 2.5 (2.0-3.0)  | 0.001 |
| 19 |                                                |          |                |       |                |              |          |               |              |                |       |
| 20 |                                                |          |                |       |                |              |          |               |              |                |       |
| 21 | <b>Tobacco use</b>                             |          |                |       |                | <b>0.001</b> |          |               |              | <b>0.001</b>   |       |
| 22 | No                                             | 423/1468 | 1              |       | 1              |              | 533/1468 | 1             |              | 1              |       |
| 23 | Yes                                            | 390/647  | 3.8 (3.1-4.6)  | 0.001 | 2.6 (2.0-3.4)  | 0.001        | 429/647  | 3.5 (2.8-4.2) | 0.001        | 2.6 (2.0-3.4)  | 0.001 |
| 24 |                                                |          |                |       |                |              |          |               |              |                |       |
| 25 |                                                |          |                |       |                |              |          |               |              |                |       |
| 26 | <b>Psychological distress</b>                  |          |                | 0.001 |                | <b>0.001</b> |          |               | <b>0.001</b> | <b>0.001</b>   |       |
| 27 | Likely to not have psychological distress      | 387/1278 | 1              |       | 1              |              | 491/1278 | 1             |              | 1              |       |
| 28 | Likely to have mild psychological distress     | 174/426  | 1.6 (1.3-2.0)  | 0.001 | 1.2 (0.9-1.5)  | 0.20         | 220/426  | 1.7 (1.4-2.1) | 0.001        | 1.4 (1.1-1.7)  | 0.05  |
| 29 | Likely to have moderate psychological distress | 159/275  | 3.2 (2.4-4.1)  | 0.001 | 2.5 (1.9-3.4)  | 0.001        | 160/275  | 2.2 (1.7-2.9) | 0.001        | 1.8 (1.3-2.4)  | 0.001 |
| 30 | Likely to have severe psychological distress   | 93/136   | 5.0 (3.4-7.4)  | 0.001 | 3.3 (2.2-5.1)  | 0.001        | 91/136   | 3.2 (2.2-4.8) | 0.001        | 2.2 (1.5-3.4)  | 0.001 |
| 31 |                                                |          |                |       |                |              |          |               |              |                |       |
| 32 |                                                |          |                |       |                |              |          |               |              |                |       |
| 33 |                                                |          |                |       |                |              |          |               |              |                |       |
| 34 | <b>HIV infection</b>                           |          |                | 0.001 |                | <b>0.05</b>  |          |               | <b>0.001</b> | <b>0.05</b>    |       |
| 35 | No                                             | 665/1677 | 1              |       | 1              |              | 784/1677 | 1             |              | 1              |       |
| 36 | Yes                                            | 67/265   | 0.5 (0.4-0.7)  | 0.001 | 0.7 (0.5-1.0)  | 0.05         | 84/265   | 0.5 (0.4-0.7) | 0.001        | 0.7 (0.5-1.0)  | 0.05  |
| 37 |                                                |          |                |       |                |              |          |               |              |                |       |
| 38 |                                                |          |                |       |                |              |          |               |              |                |       |
| 39 |                                                |          |                |       |                |              |          |               |              |                |       |
| 40 |                                                |          |                |       |                |              |          |               |              |                |       |
| 41 |                                                |          |                |       |                |              |          |               |              |                |       |
| 42 |                                                |          |                |       |                |              |          |               |              |                |       |
| 43 |                                                |          |                |       |                |              |          |               |              |                |       |
| 44 |                                                |          |                |       |                |              |          |               |              |                |       |
| 45 |                                                |          |                |       |                |              |          |               |              |                |       |
| 46 |                                                |          |                |       |                |              |          |               |              |                |       |

|                       |         |               |              |               |              |         |               |              |               |              |
|-----------------------|---------|---------------|--------------|---------------|--------------|---------|---------------|--------------|---------------|--------------|
| Not completed         | 81/173  | 1.3 (1.0-1.8) | 0.10         | 1.2 (0.8-1.8) | 0.30         | 94/173  | 1.4 (1.0-1.9) | 0.10         | 1.2 (0.9-1.8) | 0.26         |
| <b>Key population</b> |         |               | <b>0.001</b> |               | <b>0.001</b> |         |               | <b>0.001</b> |               | <b>0.001</b> |
| MSM                   | 134/641 | 1             |              | 1             |              | 196/641 | 1             |              | 1             |              |
| FSW                   | 344/937 | 2.2 (1.7-2.8) | 0.001        | 1.8 (1.4-2.4) | 0.001        | 406/937 | 1.7 (1.4-2.2) | 0.001        | 1.6 (1.3-2.1) | 0.001        |
| DU                    | 335/537 | 6.3 (4.9-8.2) | 0.001        | 2.4 (1.7-3.4) | 0.01         | 20/27   | 4.6 (3.6-5.9) | 0.001        | 2.0 (1.4-2.8) | 0.001        |

aOR: adjusted odds ratio; OR: odds ratio; 95%CI: 95% confidence interval; FDU: female drug user; MDU: male drug user; FSW: female sex worker; MSM: men who have sex with men

For peer review only

**Table 4.** Factors associated with tobacco use among key populations in Togo in 2017

|                                           | Univariate analysis |                |         | Multivariate analysis |              |
|-------------------------------------------|---------------------|----------------|---------|-----------------------|--------------|
|                                           | n/N                 | OR (95% CI)    | p-value | aOR (95% CI)          | p-value      |
| <b>Age (years)</b>                        |                     |                |         |                       | 0.14         |
| 18 – 25                                   | 280/1081            | 1              |         | 1                     |              |
| >25                                       | 367/1034            | 1.6 (1.3 -1.9) | 0.001   | 0.81 (0.6-1.1)        | 0.15         |
| <b>Marital status</b>                     |                     |                |         |                       | 0.22         |
| Not married                               | 481/1759            | 1              |         | 1                     |              |
| Married                                   | 356                 | 2.3 (1.8-2.9)  | 0.001   | 0.8 (0.6-1.1)         | 0.22         |
| <b>Level of education</b>                 |                     |                | 0.001   |                       | 0.32         |
| None                                      | 42/188              | 1              |         | 1                     |              |
| Primary school                            | 186/477             | 2.2 (1.5-3.3)  | 0.001   | 1.3 (0.8-2.3)         | 0.26         |
| Secondary/high school                     | 364/1143            | 1.6 (1.1-2.4)  | 0.01    | 1.2 (0.7-1.9)         | 0.59         |
| University                                | 55/307              | 0.8 (0.5-1.2)  | 0.230   | 0.9 (0.5-1.7)         | 0.73         |
| <b>Religion</b>                           |                     |                | 0.001   |                       | <b>0.05</b>  |
| Others/ Non-believers                     | 40/112              | 1              |         | 1                     |              |
| Christians                                | 436/1621            | 0.5 (0.4-0.6)  | 0.001   | 0.7 (0.5-1.0)         | 0.10         |
| Muslims                                   | 96/231              | 0.9 (0.6-1.3)  | 0.63    | 1.1 (0.7-1.9)         | 0.60         |
| <b>Place of residence</b>                 |                     |                |         |                       | <b>0.001</b> |
| Lomé                                      | 400/1289            | 1              |         | 1                     |              |
| Others                                    | 247/826             | 1.0 (0.8-1.2)  | 0.59    | 0.6 (0.5-0.8)         | 0.001        |
| <b>Alcohol consumption</b>                |                     |                |         |                       | <b>0.001</b> |
| No risky consumption                      | 257/1302            | 1              |         | 1                     |              |
| Hazardous/harmful drinking                | 390/813             | 3.8 (3.1-4.6)  | 0.001   | 2.6 (2.0-3.4)         | 0.001        |
| <b>Psychological distress</b>             |                     |                | 0.001   |                       | <b>0.01</b>  |
| Likely to not have psychological distress | 300/1278            | 1              |         | 1                     |              |



|                                                |          |                  |       |                  |              |
|------------------------------------------------|----------|------------------|-------|------------------|--------------|
| Likely to have mild psychological distress     | 150/426  | 1.8 (1.4-2.2)    | 0.001 | 1.5 (1.1-2.1)    | 0.01         |
| Likely to have moderate psychological distress | 128/275  | 2.8 (2.2-3.7)    | 0.001 | 2.0 (1.3-2.8)    | 0.001        |
| Likely to have severe psychological distress   | 69/136   | 3.4 (2.3-4.8)    | 0.001 | 1.3 (0.8-2.2)    | 0.30         |
| <b>HIV infection</b>                           |          |                  | 0.001 |                  | 0.34         |
| No                                             | 509/1677 | 1                |       | 1                |              |
| Yes                                            | 44/265   | 0.5 (0.3-0.6)    | 0.001 | 0.9 (0.6-1.3)    | 0.51         |
| Not completed                                  | 94/173   | 2.7 (2.0-3.8)    | 0.001 | 0.7 (0.5-1.2)    | 0.17         |
| <b>Key populations</b>                         |          |                  | 0.001 |                  | <b>0.001</b> |
| MSM                                            | 97/641   | 1                |       | 1                |              |
| FSW                                            | 116/937  | 0.8 (0.6-1.1)    | 0.12  | 0.6 (0.4-0.9)    | 0.01         |
| DU                                             | 434/537  | 23.6 (17.5-32.2) | 0.001 | 17.9 (12.4-26.4) | 0.001        |

aOR: adjusted odds ratio; OR: odds ratio; 95%CI: 95% confidence interval; FDU: female drug user; MDU: male drug user;  
 FSW: female sex worker; MSM: men who have sex with men

1  
2  
3  
4  
5  
6  
7  
8  
9  
10  
11  
12  
13  
14  
15  
16  
17  
18  
19  
20  
21  
22  
23  
24  
25  
26  
27  
28  
29  
30  
31  
32  
33  
34  
35  
36  
37  
38  
39  
40  
41  
42  
43  
44  
45  
46

For peer review only

STROBE Statement—Checklist of items that should be included in reports of *cross-sectional studies*

|                              | Item No | Recommendation                                                                                                                                                                                               |     | Pages    |
|------------------------------|---------|--------------------------------------------------------------------------------------------------------------------------------------------------------------------------------------------------------------|-----|----------|
| <b>Title and abstract</b>    | 1       | (a) Indicate the study's design with a commonly used term in the title or the abstract                                                                                                                       | X   | 1        |
|                              |         | (b) Provide in the abstract an informative and balanced summary of what was done and what was found                                                                                                          | X   | 2        |
| <b>Introduction</b>          |         |                                                                                                                                                                                                              |     |          |
| Background/rationale         | 2       | Explain the scientific background and rationale for the investigation being reported                                                                                                                         | X   | 4        |
| Objectives                   | 3       | State specific objectives, including any prespecified hypotheses                                                                                                                                             | X   | 4        |
| <b>Methods</b>               |         |                                                                                                                                                                                                              |     |          |
| Study design                 | 4       | Present key elements of study design early in the paper                                                                                                                                                      | X   | 6        |
| Setting                      | 5       | Describe the setting, locations, and relevant dates, including periods of recruitment, exposure, follow-up, and data collection                                                                              | X   | 6        |
| Participants                 | 6       | (a) Give the eligibility criteria, and the sources and methods of selection of participants                                                                                                                  | X   | 6        |
| Variables                    | 7       | Clearly define all outcomes, exposures, predictors, potential confounders, and effect modifiers. Give diagnostic criteria, if applicable                                                                     | X   | 6-7      |
| Data sources/<br>measurement | 8*      | For each variable of interest, give sources of data and details of methods of assessment (measurement). Describe comparability of assessment methods if there is more than one group                         | X   | 6-7      |
| Bias                         | 9       | Describe any efforts to address potential sources of bias                                                                                                                                                    | X   | 6        |
| Study size                   | 10      | Explain how the study size was arrived at                                                                                                                                                                    | X   | 6        |
| Quantitative variables       | 11      | Explain how quantitative variables were handled in the analyses. If applicable, describe which groupings were chosen and why                                                                                 | X   | 7        |
| Statistical methods          | 12      | (a) Describe all statistical methods, including those used to control for confounding                                                                                                                        | X   | 7        |
|                              |         | (b) Describe any methods used to examine subgroups and interactions                                                                                                                                          | X   | 7        |
|                              |         | (c) Explain how missing data were addressed                                                                                                                                                                  | N/A |          |
|                              |         | (d) If applicable, describe analytical methods taking account of sampling strategy                                                                                                                           | N/A |          |
|                              |         | (e) Describe any sensitivity analyses                                                                                                                                                                        | N/A |          |
| <b>Results</b>               |         |                                                                                                                                                                                                              |     |          |
| Participants                 | 13*     | (a) Report numbers of individuals at each stage of study—eg numbers potentially eligible, examined for eligibility, confirmed eligible, included in the study, completing follow-up, and analysed            | X   | 8        |
|                              |         | (b) Give reasons for non-participation at each stage                                                                                                                                                         | N/A |          |
|                              |         | (c) Consider use of a flow diagram                                                                                                                                                                           | N/A |          |
| Descriptive data             | 14*     | (a) Give characteristics of study participants (eg demographic, clinical, social) and information on exposures and potential confounders                                                                     | X   | 8; 18-19 |
|                              |         | (b) Indicate number of participants with missing data for each variable of interest                                                                                                                          | N/A |          |
| Outcome data                 | 15*     | Report numbers of outcome events or summary measures                                                                                                                                                         | X   | 8        |
| Main results                 | 16      | (a) Give unadjusted estimates and, if applicable, confounder-adjusted estimates and their precision (eg, 95% confidence interval). Make clear which confounders were adjusted for and why they were included | X   | 8-9      |

|                          |    |                                                                                                                                                                            |     |       |
|--------------------------|----|----------------------------------------------------------------------------------------------------------------------------------------------------------------------------|-----|-------|
|                          |    | (b) Report category boundaries when continuous variables were categorized                                                                                                  | X   | 8-9   |
|                          |    | (c) If relevant, consider translating estimates of relative risk into absolute risk for a meaningful time period                                                           | N/A |       |
| Other analyses           | 17 | Report other analyses done—eg analyses of subgroups and interactions, and sensitivity analyses                                                                             | N/A |       |
| <b>Discussion</b>        |    |                                                                                                                                                                            |     |       |
| Key results              | 18 | Summarise key results with reference to study objectives                                                                                                                   | X   | 10    |
| Limitations              | 19 | Discuss limitations of the study, taking into account sources of potential bias or imprecision. Discuss both direction and magnitude of any potential bias                 | X   | 11    |
| Interpretation           | 20 | Give a cautious overall interpretation of results considering objectives, limitations, multiplicity of analyses, results from similar studies, and other relevant evidence | X   | 10    |
| Generalisability         | 21 | Discuss the generalisability (external validity) of the study results                                                                                                      | X   | 10-11 |
| <b>Other information</b> |    |                                                                                                                                                                            |     |       |
| Funding                  | 22 | Give the source of funding and the role of the funders for the present study and, if applicable, for the original study on which the present article is based              | X   | 13    |

\*Give information separately for exposed and unexposed groups.

**Note:** An Explanation and Elaboration article discusses each checklist item and gives methodological background and published examples of transparent reporting. The STROBE checklist is best used in conjunction with this article (freely available on the Web sites of PLoS Medicine at <http://www.plosmedicine.org/>, Annals of Internal Medicine at <http://www.annals.org/>, and Epidemiology at <http://www.epidem.com/>). Information on the STROBE Initiative is available at [www.strobe-statement.org](http://www.strobe-statement.org).

# BMJ Open

## PREVALENCE AND CORRELATES OF ALCOHOL AND TOBACCO USE AMONG KEY POPULATIONS IN TOGO IN 2017: A CROSS-SECTIONAL STUDY

|                                 |                                                                                                                                                                                                                                                                                                                                                                                                                                                                                                                                                                                                                                                                                                                                                                                                                                                                                                                                                                                                                                                                                                                                                                                                                                                                                                                                                                    |
|---------------------------------|--------------------------------------------------------------------------------------------------------------------------------------------------------------------------------------------------------------------------------------------------------------------------------------------------------------------------------------------------------------------------------------------------------------------------------------------------------------------------------------------------------------------------------------------------------------------------------------------------------------------------------------------------------------------------------------------------------------------------------------------------------------------------------------------------------------------------------------------------------------------------------------------------------------------------------------------------------------------------------------------------------------------------------------------------------------------------------------------------------------------------------------------------------------------------------------------------------------------------------------------------------------------------------------------------------------------------------------------------------------------|
| Journal:                        | <i>BMJ Open</i>                                                                                                                                                                                                                                                                                                                                                                                                                                                                                                                                                                                                                                                                                                                                                                                                                                                                                                                                                                                                                                                                                                                                                                                                                                                                                                                                                    |
| Manuscript ID                   | bmjopen-2019-028934.R2                                                                                                                                                                                                                                                                                                                                                                                                                                                                                                                                                                                                                                                                                                                                                                                                                                                                                                                                                                                                                                                                                                                                                                                                                                                                                                                                             |
| Article Type:                   | Research                                                                                                                                                                                                                                                                                                                                                                                                                                                                                                                                                                                                                                                                                                                                                                                                                                                                                                                                                                                                                                                                                                                                                                                                                                                                                                                                                           |
| Date Submitted by the Author:   | 06-Aug-2019                                                                                                                                                                                                                                                                                                                                                                                                                                                                                                                                                                                                                                                                                                                                                                                                                                                                                                                                                                                                                                                                                                                                                                                                                                                                                                                                                        |
| Complete List of Authors:       | <p>Bitty-Anderson, Alexandra; PACCI Research Center - Site ANRS Côte d'Ivoire<br/>           GBEASOR-KOMLANVI, Fifonsi Adjidossi; Universite de Lome Faculte des Sciences de la Sante; Centre Africain de Recherches en Epidemiologie et en Santé Publique (CARESP)<br/>           Johnson, Pascal; Centre Africain de Recherches en Epidemiologie et en Santé Publique (CARESP)<br/>           Sewu, Essèboè; Centre Africain de Recherches en Epidemiologie et en Santé Publique (CARESP)<br/>           Dagnra, Claver; Universite de Lomé Laboratoire de Biologie Moléculaire Salou, Mounerou; Universite de Lomé Laboratoire de Biologie Moléculaire Blatome, Tetouyaba; Centre Africain de Recherches en Epidemiologie et en Santé Publique (CARESP)<br/>           Jaquet, Antoine; INSERM U1219 Bordeaux Population Health Research Université de Bordeaux; Université de Bordeaux Institut de Santé Publique Epidémiologie et Développement<br/>           Coffie, Patrick; Université de Bordeaux Institut de Santé Publique Epidémiologie et Développement; Université Felix Houphouet-Boigny Unite de Formation et de Recherche des Sciences Medicales, Dermatologie et Infectiologie<br/>           Ekouevi, Didier; Universite de Lome Faculte des Sciences de la Sante; INSERM U1219 Bordeaux Population Health Research Université de Bordeaux</p> |
| <b>Primary Subject Heading</b>: | HIV/AIDS                                                                                                                                                                                                                                                                                                                                                                                                                                                                                                                                                                                                                                                                                                                                                                                                                                                                                                                                                                                                                                                                                                                                                                                                                                                                                                                                                           |
| Secondary Subject Heading:      | Public health                                                                                                                                                                                                                                                                                                                                                                                                                                                                                                                                                                                                                                                                                                                                                                                                                                                                                                                                                                                                                                                                                                                                                                                                                                                                                                                                                      |
| Keywords:                       | EPIDEMIOLOGY, HIV & AIDS < INFECTIOUS DISEASES, Public health < INFECTIOUS DISEASES, Substance misuse < PSYCHIATRY, Key Populations                                                                                                                                                                                                                                                                                                                                                                                                                                                                                                                                                                                                                                                                                                                                                                                                                                                                                                                                                                                                                                                                                                                                                                                                                                |
|                                 |                                                                                                                                                                                                                                                                                                                                                                                                                                                                                                                                                                                                                                                                                                                                                                                                                                                                                                                                                                                                                                                                                                                                                                                                                                                                                                                                                                    |

SCHOLARONE™  
Manuscripts

1  
2  
3  
4  
5  
6  
7  
8  
9  
10  
11  
12  
13  
14  
15  
16  
17  
18  
19  
20  
21  
22  
23  
24  
25  
26  
27  
28  
29  
30  
31  
32  
33  
34  
35  
36  
37  
38  
39  
40  
41  
42  
43  
44  
45  
46  
47  
48  
49  
50  
51  
52  
53  
54  
55  
56  
57  
58  
59  
60

1  
2  
3 **PREVALENCE AND CORRELATES OF ALCOHOL AND TOBACCO USE AMONG KEY**  
4 **POPULATIONS IN TOGO IN 2017: A CROSS-SECTIONAL STUDY**  
5  
6  
7

8 Alexandra M BITTY-ANDERSON<sup>1</sup>, Fifonsi A GBEASOR-KOMLANVI<sup>2,3</sup>, Pascal JOHNSON<sup>3</sup>  
9 Essèboè K SEWU<sup>3</sup>, Claver A DAGNRA<sup>4</sup>, Mounerou SALOU<sup>4</sup>, Tetouyaba J BLATOME<sup>3</sup>, Antoine  
10 JAQUET<sup>5,6</sup>, Patrick A COFFIE<sup>6,7,8</sup>, Didier K EKOUEVI<sup>1,2,3,5,6</sup>, §

- 11  
12  
13  
14  
15 1. Programme PACCI – Site ANRS Côte d’Ivoire, CHU de Treichville, Abidjan, Côte d’Ivoire  
16  
17  
18 2. Université de Lomé, Faculté des Sciences de la Santé, Département de Santé Publique, Lomé, Togo  
19  
20  
21 3. Centre Africain de Recherches en Epidémiologie et en Santé Publique (CARESP), Lomé, Togo  
22  
23  
24 4. Université de Lomé, Laboratoire de Biologie Moléculaire, Département des Sciences  
25 Fondamentales, Lomé, Togo  
26  
27  
28 5. INSERM U1219, Bordeaux Population Health Research, ISPED, Université de Bordeaux,  
29 Bordeaux, France  
30  
31  
32 6. Université de Bordeaux, Institut de Santé Publique Epidémiologie Développement (ISPED),  
33 Bordeaux, France  
34  
35  
36 7. Université Félix Houphouët Boigny, Département de Dermatologie et d’Infectiologie, UFR des  
37 Sciences Médicales, Abidjan, Côte d’Ivoire  
38  
39  
40 8. CHU de Treichville, Service de maladies infectieuses et tropicales, Abidjan, Côte d’Ivoire  
41  
42  
43  
44  
45  
46  
47

48 **\*Word Count** (excluding title page, abstract, references, figures and tables): 4,112  
49

50 **§ Corresponding Author:**

51 Didier Koumavi EKOUEVI, MD, PhD

52 Université de Lomé (Togo)

53 Faculté des Sciences de la Santé

54 Département de Santé Publique

55 Cell: +228 93136655

56 Email: [didier.ekouevi@gmail.com](mailto:didier.ekouevi@gmail.com)  
57  
58  
59  
60

**Abstract****Objectives**

The aim of this study was to estimate alcohol and tobacco use prevalence and their correlates among female sex workers (FSW), men who have sex with men (MSM) and drug users (DU) in Togo.

**Design, setting and participants**

A cross-sectional bio-behavioral study was conducted among 2,115 MSM, FSW and DU in 2017 using a respondent-driven sampling (RDS) method, in the eight biggest towns of Togo. Selection criteria for the MSM were being male and having had oral or anal intercourse with a man in the previous 12 months; for FSW, being a female and having exchanged sex for money in the previous 12 months; and for DU, consuming heroin, cocaine or hashish for MSM, FSW and DU, respectively. All participants had to be at least 18 years old and residing in the territory for the past three months.

**Results**

The prevalence of alcohol consumption, hazardous/harmful consumption and binge drinking was 64.8%, 38.4%, and 45.5%, respectively. Current tobacco use was reported by 30.6% of participants and HIV prevalence was estimated at 12.5%. DU were more likely to engage in binge drinking compared to other key populations (aOR=2.0; 95% CI = [1.4-2.8]; p= 0.001). Participants who were identified as having hazardous/harmful alcohol consumption had almost three times the odds of tobacco consumption than those with no risky consumption (aOR=2.6; 95% CI= [2.0-3.4]; p=0.001). Hazardous/harmful alcohol consumption was three times more likely among participants with severe psychological distress compared to those with no psychological distress (aOR= 3.3, 95% CI= [2.2 – 5.1]; p=0.001).

**Conclusion**

Findings from this study demonstrate the need for the integration of mental health and substance abuse reduction interventions into HIV prevention programs, particularly those geared toward key populations.

**Key words:** Alcohol, tobacco, HIV, key populations, Sub-Saharan Africa.



### Strengths and limitations of this study

- This study is among the first in sub-Saharan Africa exploring the patterns of alcohol and tobacco consumption among the three main groups of key populations
- This study had a consistent sample size
- The use of internationally validated instruments to assess alcohol and tobacco consumption, as well as psychological distress minimized bias
- The main limitation of our study is that it was based on self-reported data which could be a potential source of recall bias or social desirability bias

For peer review only

## Introduction

Sub-Saharan Africa (SSA) is the region of the World the most affected by the HIV/AIDS epidemic: with only 12% of the global population, SSA accounts for an estimated 71% of the world's burden of HIV infection and 74% of world's AIDS-related deaths (1). In West and Central Africa, the HIV epidemic is described as generalized and driven by heterosexual sex with an estimated prevalence of 2.2% (1). However, in key populations, populations at higher risk of HIV such as sex workers, men who have sex with men (MSM) and injection drug users, the reported prevalence rates are disproportionately high compared to those of the general population (2,3). In Togo, HIV prevalence among key populations ranges from 11% to 13% compared to 2.1% in the general population (4). Several biological, behavioral and structural risk factors are associated with this high HIV rate among key populations: unprotected sex, presence of other Sexually Transmitted Infections (STIs), lack of access to condoms, multiple concurrent sex partners (males and females for MSM), lack of access to health care and prevention services, physical and sexual violence, challenging legal and sociopolitical environment, poverty, sociopolitical stigma and discrimination (2,3).

Other risk factors associated with sexual risk behaviors and thus contributing to HIV transmission include alcohol and tobacco consumption. Alcohol, a psychoactive substance with dependence-producing properties, has been an integral part of many cultures for several centuries (5). The harmful use of alcohol and its consequences make its consumption a public health problem. More than 200 disease and injury conditions including alcohol dependence, liver cirrhosis, cancers and injuries are the consequences of the harmful use of alcohol (5). In 2012, it was reported that 5.9% of all global deaths and 5.1% of the global burden of disease and injury were the consequences of harmful alcohol consumption (5). Recent research studies have also uncovered a causal relationship between the harmful use of alcohol and infectious diseases, including HIV (5–7). This relation could be attributed to the fact that alcohol influences cognitive abilities and decision making, and affects condom negotiation and correct condom use (8). Among key populations, particularly sex workers, alcohol consumption is seen as a sexual enhancer and work requirement which in many cases leads to an increased likelihood of unprotected sex, economic loss, interference with family responsibilities and sexual violence (7,9,10).

Tobacco consumption is also one of the biggest public health challenges of the 21<sup>st</sup> century, with a clear, causal link between tobacco use and health. It is estimated that tobacco use kills half of its users and is responsible for the death of more than 7 million people a year. Approximately 80% of tobacco users live in low and middle income countries (11). Tobacco use is one the main risk factors for lung cancer, disability and death from non-communicable chronic diseases, and also an increased risk of death from communicable diseases (12,13). For people living with HIV, tobacco use is a risk factor for HIV-related comorbidities and premature death (14). Estimates in Togo put the prevalence of alcohol and tobacco consumption at 53.7% and 8.5% respectively, in the general population (15).

1  
2  
3  
4 Both alcohol and tobacco consumption play an important role in the HIV epidemic in SSA. With key  
5 populations being an important catalyst of the HIV epidemic in SSA and particularly in West Africa, it  
6 is important that patterns of alcohol and tobacco consumption be explored among these populations.  
7  
8 However, there is a dearth of data on the consumption of addictive substances such as tobacco and  
9 alcohol among the three main key populations in SSA. Of the few studies on key populations completed  
10 in Togo, none has explored alcohol and tobacco consumption and very few studies in West Africa have  
11 explored alcohol and tobacco consumption across the three key populations. The aim of this study was  
12 to estimate the prevalence of alcohol and tobacco consumption and to assess their correlates among  
13 female sex workers (FSW), MSM and drug users (DU) in Togo.  
14  
15  
16  
17  
18  
19  
20  
21  
22  
23  
24  
25  
26  
27  
28  
29  
30  
31  
32  
33  
34  
35  
36  
37  
38  
39  
40  
41  
42  
43  
44  
45  
46  
47  
48  
49  
50  
51  
52  
53  
54  
55  
56  
57  
58  
59  
60

## Methods

### Study design, sampling and recruitment

This study was a bio-behavioral cross-sectional study conducted from August to September 2017 in Togo. Togo is a country of West Africa, with a population of 7.6 million inhabitants in 2018, covering 57,000 square kilometres with an average density of 133 inhabitants per square kilometres, an infant mortality of 45.2/ 1,000 and an estimated life expectancy of 64.5 years old. The HIV prevalence in Togo is estimated at 2.1%, with a high prevalence among key population groups (4). Togo is divided into five regions and in each region, based on the mapping and size estimation studies previously carried out in Togo (16), towns with the highest number of key populations were selected: Dapaong in the Savanes region; Kara in Kara region; Sokodé in the Centrale region; Atakpamé and Kpalimé in the Plateaux region and Tsévié, Aného and Lomé, the capital city in the Maritime region. Prior to the study, locations (associations and hot spots) specific to each group of key population were identified during preliminary visits with the help of leaders from these communities. DU and FSW were recruited in drug-dealing/consumption locations and brothels (licensed or not), respectively. MSM were recruited using a Respondent Driven Sampling (RDS) method (17,18). MSM community leaders were the first “seeds”. A total of 28 seeds were identified at first based on their roles in their community and on their representativeness. Each seed from the first wave selected had to represent at least one MSM sub-group, based on how MSM self-identify as bisexuals or gays (19,20). Each participant was then given three coupons with a unique identification code to recruit three other seeds in their network until the required sample size for each group was reached. Inclusion criteria for the three groups were being 18 years or older, living/working/studying in Togo for a minimum of 3 months at the time of the study, and being in possession of a recruitment coupon. In addition to these criteria, criteria specific to MSM were having had anal and/or oral sex with a man in the previous 12 months, for FSW having had sex in exchange for money as a compensation in the previous 12 months and for DU, consuming heroin, cocaine or hashish at the time of the study.

### Sample size estimation

The sample size estimation was based on the estimated prevalence of hazardous alcohol drinking among key populations of 9.1% (21). We also took into account the prevalence of tobacco use, with the assumption that tobacco use prevalence in the key populations would be twice that of the general population. Hence, with a tobacco use prevalence of 6.8% in the general population, the expected prevalence of tobacco use among key populations was 13.6% (15). With a precision of 3% and an assumption of 10% of missing data, the minimum sample size was estimated at 552 participants per group at a minimum. Thus, to allow a comparison between groups, the total sample size estimated for the three groups of key populations was 1,656.

## Study procedures

After eligibility screening and written informed consent approval, trained study staff (medical students) administered a structured and standardized questionnaire during a face-to-face interview. The interviews took place in the MSM community-based organizations for the MSM, for the FSW, in selected bars around the main “hot spots” from which they were recruited and for the DU, recruitment occurred in the smoking spots in the “ghettos”. The questionnaire was constructed based on validated tools such as the Alcohol Use Disorders Identification Test (AUDIT) (22) and a subset of the Tobacco Questions for Surveys (23) to assess alcohol and tobacco consumption respectively. The Kessler Psychological Distress Scale (K10) (24) was used to measure psychological distress and the Family Health International (FHI) 360 validated guide for bio-behavioral surveys (25) was adapted to collect information on socio-demographic characteristics, risky sexual behaviors, STIs, HIV prevention methods, HIV testing history, access to health care services, and HIV knowledge. The questionnaires were used across the three populations with slight adaptations depending on the population.

## Scores and operational definitions

The AUDIT was used to assess alcohol consumption. The AUDIT is a set of 10-item standardized screening instrument measuring self-reported alcohol use in the past 12 months, alcohol dependence symptoms, and alcohol-related problems to screen for excessive drinking. Each question of the AUDIT can obtain a score from zero (0) to four (4). A score  $\geq 8$  for men and  $\geq 7$  for women indicates hazardous/harmful drinking, while a score of 0 indicates a non-drinker; moderate alcohol use lies in-between (22,26,27). Binge drinking or heavy episodic drinking was defined as the consumption of six or more alcohol drinks on at least one occasion in the past 30 days (third item of the AUDIT) (22).

Tobacco use was assessed using six questions indicating participants’ smoking habits, frequency of smoking, history of smoking, type of products smoked and attempts at stopping to smoke (23).

The Kessler Psychological Distress Scale (K10) was used to measure psychological distress. This scale has been examined and validated among several populations and aims at measuring anxiety and depression with a 10-item questionnaire, each question pertaining to an emotional state and a five-level response scale for each response. The score obtained from the scale allows to categorize participants into four categories of psychological distress: severe (score  $\geq 30$ ), moderate (score: 25-29), mild (score: 20-24) and none (score  $< 20$ ) (28).

## Laboratory testing

Written informed consent was obtained prior to blood sample collection. Among the 2,115 key populations recruited for the study, 91.8% gave their written informed consent for blood sample collection. Blood samples were collected to test for HIV and Syphilis using SD Biolane Duo® (Abbott, Santa Clara, CA, USA). Each HIV positive test was confirmed with another HIV rapid test, the First

1  
2  
3 Response® HIV 1-2-O Card Test (Premier Medical Corporation Pvt. Ltd., Maharashtra, India). In case  
4 of discordant results, samples were tested with the INNO-LIA® HIV I/II Score (20T) (Fujirebio,  
5 Göteborg, Sweden) line immunoassay. All biological tests analyses were completed in the main HIV  
6 laboratory research unit, the Molecular Biology Laboratory (BIOLIM) at the University of Lomé.  
7  
8  
9

### 10 11 **Statistical analysis**

12 Descriptive statistics were performed and results were presented with frequency tabulations and  
13 percentages. Prevalences were estimated with their 95% confidence interval (95%CI). Univariate and  
14 multivariate logistic regression were performed to identify factors associated with: i) hazardous/harmful  
15 alcohol consumption, ii) binge drinking and iii) current tobacco consumption. For model building,  
16 characteristics that had a p-value <0.20 in univariate analysis were considered for the full multivariable  
17 models, which were then finalized using a stepwise, backward elimination approach. The three models  
18 did not include the variable “sex” as the four groups were already categorized according to sex. All  
19 analyses were performed using R® software.  
20  
21  
22  
23  
24  
25

### 26 27 **Ethical consideration**

28 This study was approved by the “Comité de Bioéthique pour la Recherche en Santé (CBRS)” (Bioethics  
29 Committee for Health Research) from the Togo Ministry of Health. Participants provided written  
30 consent prior to participation. Potential participants were told about the study purpose and procedures,  
31 potential risks and protections, and compensation. Informed consent was documented with signed  
32 consent forms.  
33  
34  
35  
36  
37

### 38 39 **Patient and Public Involvement**

40 Members of key populations were involved during the study design and data collection phases of the  
41 study. They were consulted prior to the study for their input on the best method to reach out to key  
42 populations and they were actively involved in the recruitment process.  
43  
44  
45

## 46 47 **Results**

### 48 49 **Socio-demographic characteristics**

50 A total of 641 MSM, 537 DU and 937 FSW, with a median age of 25 years, interquartile range (IQR)  
51 [21-32 years] participated in the study. The majority of the sample (n=1,443; 54.0%) had a secondary  
52 school education level and 76.7% were Christians (n=1,621). Approximately two-thirds of the sample  
53 (n=1,278; 60.4%) were likely to not have any psychological distress and 6.4% (n=136) were identified  
54 as having severe psychological distress, the highest among DU (n=68; 12.7 %). The HIV prevalence  
55 was 12.5% across the three populations, with the highest prevalence among MSM (20.4%). Study  
56 participants were informed of their blood test results by trained health professionals from HIV clinics.  
57  
58  
59  
60

Newly diagnosed HIV positive patients were referred to an HIV clinic for HIV treatment and care. Socio-demographic and health characteristics are summarized in Table 1.

### **Alcohol and tobacco consumption**

Alcohol and tobacco consumption patterns are presented in Table 2. Overall, the prevalence of alcohol consumption among the three groups was 64.8%. Most participants were identified as having a hazardous/harmful alcohol consumption (n=813; 38.4%), with the highest proportion among DU (62.4% among DU; 36.7% among FSW; and 20.9% among MSM;  $p < 0.001$ ). More than a quarter of FSW (n=275; 29.4%) were moderate drinkers. The MSM subgroup had the highest proportion of non-drinkers (n=338; 52.7%), followed by FSW (n=318; 33.9%). The overall prevalence of binge drinking was 45.5% and was the highest among DU (67.0%) (Table 2).

The prevalence of tobacco consumption was 30.6% among the three groups. DU had the highest proportion of smokers (80.8%). The highest proportion of non-smokers were FSW (n=821; 87.6%), followed by MSM (n=544, 84.9%). Of the people who smoked, 63.1% were smoking every day, including 79.0% of DU, 42.2% of FSW and 16.5% of MSM.

### **Factors associated with alcohol consumption**

Table 3 reports the results of the multivariable logistic regression model which describes the association between the independent variables and the hazardous/harmful consumption of alcohol and binge drinking. The odds of hazardous/harmful alcohol consumption were significantly higher among non-believers or other (aOR=0.7; 95% CI= [0.5-0.9];  $p = 0.001$ ) than among Muslims (aOR= 0.4; 95% CI [0.3-0.6];  $p = 0.001$ ) and Christians (aOR=0.7; 95% CI= [0.5-0.9];  $p = 0.001$ ). FSW (aOR=1.6; 95% CI= [1.3-2.1];  $p = 0.001$ ), and DU (aOR=2.0; 95% CI = [1.4-2.8];  $p = 0.001$ ) were more likely to engage in binge drinking compared to MSM. The place of residence, whether in the capital city of Lomé or in other towns, was also associated with hazardous/harmful alcohol consumption and binge drinking so that people living in other towns were almost three times more likely to have hazardous/harmful alcohol consumption (aOR=2.8; 95% CI= [2.2-3.4];  $p = 0.001$ ) or engage in binge drinking (aOR=2.5; 95% CI= [2.0-3.0];  $p = 0.001$ ) than those living in the capital city of Lomé. Psychological distress was also a risk factor for hazardous/harmful alcohol consumption and binge drinking. Participants with severe psychological distress were three times (aOR= 3.3, 95% CI= [2.2 – 5.1];  $p = 0.001$ ) and twice (aOR=2.2, 95% CI= [1.5 – 3.4];  $p = 0.001$ ) more likely to be engaged in hazardous/harmful alcohol consumption and binge drinking, respectively, than those with no psychological distress. The odds of hazardous/harmful alcohol consumption and binge drinking increased as the severity of psychological distress increased. In addition, being a DU was significantly associated with hazardous/harmful alcohol consumption and binge drinking. Compared to MSM and FSW, DU had two times the odds of hazardous/harmful alcohol consumption (aOR=2.4; 95%CI= [1.7-3.4];  $p = 0.001$ ) and two times the odds of binge drinking compared to MSM and FSW (aOR=2.0; 95%CI= [1.4 -2.8]). Finally, being 25 years



1  
2  
3 old and older (aOR=1.3; 95% CI [1.1-1.6]), tobacco use (aOR=2.6; 95% CI: [2.0-3.4]), being HIV  
4 positive (aOR=0.7; 95% CI [0.5-0.9]) were significantly associated with both hazardous/harmful alcohol  
5 consumption and binge drinking.  
6  
7

### 8 9 **Factors associated with tobacco use**

10  
11  
12 In multivariable analysis, living in cities other than Lomé (the capital city) (aOR=0.6; 95%CI 0.5-0.8),  
13 hazardous/harmful alcohol consumption (aOR=2.6; 95% CI 2.0-3.4), having mild (aOR=1.5; 95% CI  
14 1.1-2.1) or moderate (aOR=2.0; 95% CI 1.3-2.8) psychological distress, being a FSW (aOR=0.6; 95%  
15 0.4-0.9), and being a DU (aOR=17.9; 95% CI 12.4-26.4) were factors associated with tobacco use (Table  
16 4) .  
17  
18  
19  
20  
21  
22  
23  
24  
25  
26  
27  
28  
29  
30  
31  
32  
33  
34  
35  
36  
37  
38  
39  
40  
41  
42  
43  
44  
45  
46  
47  
48  
49  
50  
51  
52  
53  
54  
55  
56  
57  
58  
59  
60



## Discussion

The aim of this study was to assess the prevalence of hazardous/harmful, binge alcohol consumption as well as tobacco consumption, and explore correlates of heavy alcohol consumption and tobacco use in three key populations in Togo. We observed a high prevalence of hazardous/harmful alcohol consumption and binge drinking. Alcohol consumption was frequent among FSW and much more among DU. In addition, there was a dose-response effect relationship between alcohol consumption and psychological distress across all three populations. Tobacco use was highly prevalent among DU and among people who had a hazardous/harmful alcohol consumption.

Alcohol consumption is highly prevalent among key populations groups: more than half of the sample were categorized as moderate or hazardous drinkers. This has been corroborated in the literature among key population groups. In a recent study in Kenya, among 1,476 MSM, 44% of the sample had a hazardous alcohol consumption, and, no relationship was found between alcohol and tobacco consumption and HIV infection (29). In another study among 3,588 MSM in China, alcohol prevalence was 56.1% with 16.8% of them being binge drinkers and 14.4% being recent hazardous drinkers, using the WHO AUDIT-C scale (30). Recent alcohol misuse was associated with increased sexual and HIV/syphilis risks as well as sexual risk behaviors including alcohol use before sex, sex without condoms and multiple concurrent partnerships. A prospective cohort study among 1,027 FSW in Uganda found that 78% of the sample reported using alcohol with 71% admitting to using alcohol at least once a week, with a reduced prevalence of 54% after two years of intervention (31). This emphasizes the need for alcohol risk reduction programs and programs specifically focused on the adoption of safer drinking practices integrated into HIV prevention packages and geared towards highly exposed groups (30,31).

Alcohol and tobacco consumption are particularly relevant to people living with HIV (PLHIV). Studies have demonstrated a negative impact of alcohol, tobacco and drug use on life expectancy for HIV-positive patients (32). Alcohol and tobacco use have also been associated with poor adherence to antiretroviral therapy (ART) and the interaction between all those substances leading to a higher susceptibility to co-morbidities, opportunistic infections such as tuberculosis (TB) (33,34). In this study, hazardous/harmful alcohol consumption and binge drinking were both significantly associated with tobacco use (33). This indicates the need for targeted prevention actions such as smoking cessation treatment and alcohol reducing counseling, among key populations, particularly among key populations living with HIV. A systematic review of interventions to reduce alcohol use among MSM indicated that although interventions such as motivational interviewing appear to be effective among MSM, they are scarce (35).

Psychological distress was found to have a dose-response relationship with alcohol consumption. Severe psychological distress was at least twice higher among people with a hazardous/harmful alcohol

1  
2  
3 consumption and people who were binge drinking. This is consistent with other studies that found a  
4 relationship between alcohol and drug abuse and psychological symptoms such as depression, anxiety  
5 and suicidal ideation among key populations (29,36,37). Consistent with our findings, a study conducted  
6 in Cambodia among MSM found that 38.8% had severe psychological distress and that severe  
7 psychological distress was associated with alcohol and drug use, poor self-reported quality of life and  
8 reduced condom use at last sex (36). In southern India, a study among FSW found a significant  
9 relationship between major depression and alcohol use (38). Another study among PLHIV in Uganda  
10 found that psychological distress was significantly associated with non-adherence to ART (39). This has  
11 implication for HIV prevention and further demonstrates the need for integrated services of mental  
12 health interventions, psychological support as well as substance abuse reduction program into HIV  
13 prevention programs. In fact, in Togo, the current policy on HIV prevention and care ensures access to  
14 HIV prevention and treatment services with the integration of Sexual and Reproductive Services and  
15 HIV care services for all citizens including key populations, but mental health interventions are not yet  
16 a component of the basic health services package. This would also imply that health care workers be  
17 sufficiently armed through sufficient and adequate training to screen and refer key populations in need  
18 of those interventions.  
19

20  
21  
22 Very few studies have explored alcohol and tobacco consumption patterns among the three main key  
23 populations. This study found quite different patterns of consumption among the three groups, with  
24 MSM in this sample being the lowest at-risk group for hazardous/harmful alcohol consumption, binge  
25 drinking and tobacco use. DU on the other hand, appear to be most vulnerable to hazardous/harmful  
26 alcohol consumption, binge drinking and tobacco use, as well as the group with the highest prevalence  
27 of severe psychological distress. This could potentially indicate that there is a difference in coping  
28 strategies for key populations and that, behavioral interventions specifically geared towards MSM have  
29 elements that perhaps have successfully enhanced their capacity to cope with the stress among the most  
30 marginalized groups. For example, studies have demonstrated the effectiveness of community-based  
31 organizations (CBOs), peer-led interventions and community engagement in HIV prevention among  
32 MSM (40–42). It is important that targeted interventions be geared toward generating an interest for  
33 community building among DU.  
34

35  
36  
37 Strengths of this study include the large sample size of the three main types of key populations. In  
38 addition, to our knowledge, this is the first study in Togo comparing alcohol and tobacco consumption  
39 in these key populations using standardized tools (AUDIT, Tobacco Questions for Surveys, and Kessler  
40 psychological distress scale). Finally, this study was completed in the eight main cities of Togo and used  
41 geographical mapping as well as RDS sampling, which could indicate that the findings of this study to  
42 reflect the national prevalence of alcohol and tobacco consumption among key populations.  
43  
44  
45  
46  
47  
48  
49  
50  
51  
52  
53  
54  
55  
56  
57  
58  
59  
60

1  
2  
3 However, there were few limitations including the fact that some variables such as childhood abuse,  
4 stigma, or recent trauma which could influence alcohol and tobacco consumption, have not been  
5 collected. Interactions between the different groups of key populations (i.e., DUs engaging in sex work,  
6 MSM who engage in sex work, sex workers who are also MSM) were also not collected. Furthermore,  
7 self-reported data used in this study, are prone to social desirability and recall bias. Despite these  
8 limitations, the results presented in this study make a unique contribution to the literature on alcohol and  
9 tobacco use among key populations in West Africa, especially since Togo shares similar characteristics  
10 with other countries of West Africa regarding the HIV epidemic (concentrated HIV epidemics with  
11 elevated HIV prevalences among key populations), access to treatment and prevention for key  
12 populations (3,43). The results could be generalized to other countries in West Africa.  
13  
14  
15  
16  
17  
18

19 Further research could further explore the relationship between alcohol, tobacco, depression and sexual  
20 risk behaviors and HIV infection among key populations. Qualitative studies could also explore the  
21 reasons for high alcohol and tobacco consumption among key populations.  
22  
23  
24

### 25 **Conclusion**

26  
27 Alcohol and tobacco use and abuse are highly prevalent among key populations. Psychological distress  
28 and being a DU were both significantly associated with alcohol and tobacco consumption. There is a  
29 need for mental health and substance abuse screening, referral and treatment to be addressed and fully  
30 integrated into HIV prevention services for key populations. Further research is also needed to explore,  
31 through qualitative and quantitative designs, the consequences and impact of alcohol and tobacco  
32 consumption, as well as mental health issues such as psychological distress on individuals and its  
33 contribution to the HIV epidemic.  
34  
35  
36  
37  
38  
39  
40  
41  
42  
43  
44  
45  
46  
47  
48  
49  
50  
51  
52  
53  
54  
55  
56  
57  
58  
59  
60

**Author contributorship**

ABA and FGK contributed equally to this paper. ABA, FGK, PAC and DKE conceived and designed the study with inputs from AJ. PJ, EKS, CAD, MS and TJB facilitated data collection and contributed to analysis of the data. ABA and FGK analyzed, interpreted the data and drafted the manuscript. PAC, AJ and DKE revised the manuscript for important intellectual content. All authors participated in the revision process and have approved the final version of the manuscript.

**Competing interests**

No competing interests to declare

**Funding**

This work was supported by the « Centre Africain de Recherche en Epidémiologie et en Santé Publique (CARESP) » (African Center for Epidemiology and Public Health Research) and the Togo National HIV/AIDS and STI Control Program.

**Data sharing statement**

No additional data are available

**Ethics approval and consent to participate**

This study was reviewed and approved by the Bioethics Committee for Research in Health in Togo (CBRS No. 18/2017/CBRS of June 22 2017). Consent was obtained from each participant prior to administering the survey questions.

## References

1. Kharsany ABM, Karim QA. HIV Infection and AIDS in Sub-Saharan Africa: Current Status, Challenges and Opportunities. *Open AIDS J*. 2016 Apr 8;10:34–48.
2. Djomand G, Quaye S, Sullivan PS. HIV epidemic among key populations in west Africa. *Curr Opin HIV AIDS*. 2014 Sep;9(5):506–13.
3. HIV and AIDS in West and Central Africa Overview [Internet]. AVERT. 2017 [cited 2018 Jul 19]. Available from: <https://www.avert.org/hiv-and-aids-west-and-central-africa-overview>
4. Joint United Nations Programme on HIV/AIDS (UNAIDS). Togo [Internet]. [cited 2018 Jul 19]. Available from: <http://www.unaids.org/en/regionscountries/countries/togo>
5. World Health Organization (WHO). Global status report on alcohol and health, 2018 [Internet]. 2018 [cited 2018 Oct 10]. Available from: [http://www.who.int/substance\\_abuse/publications/global\\_alcohol\\_report/gsr\\_2018/en/](http://www.who.int/substance_abuse/publications/global_alcohol_report/gsr_2018/en/)
6. Lama TP, Kumoji E 'Kuor, Ketlogetswe D, Anderson M, Brahmabhatt H. Alcohol Consumption and Risky Sexual Behavior Among Persons Attending Alcohol Consumption Venues in Gaborone, Botswana. *Prev Sci Off J Soc Prev Res*. 2016 Feb;17(2):227–36.
7. Sileo KM, Kintu M, Chanes-Mora P, Kiene SM. “Such Behaviors Are Not in My Home Village, I Got Them Here”: A Qualitative Study of the Influence of Contextual Factors on Alcohol and HIV Risk Behaviors in a Fishing Community on Lake Victoria, Uganda. *AIDS Behav*. 2016 Mar;20(3):537–47.
8. Chersich MF, Rees HV. Causal links between binge drinking patterns, unsafe sex and HIV in South Africa: its time to intervene. *Int J STD AIDS*. 2010 Jan;21(1):2–7.
9. Chen Y, Li X, Shen Z, Zhou Y, Tang Z. Drinking reasons and alcohol problems by work venue among female sex workers in Guangxi, China. *Subst Use Misuse*. 2015 Apr;50(5):642–52.
10. Heravian A, Solomon R, Krishnan G, Vasudevan CK, Krishnan AK, Osmand T, et al. Alcohol consumption patterns and sexual risk behavior among female sex workers in two South Indian communities. *Int J Drug Policy*. 2012 Nov;23(6):498–504.
11. Tobacco [Internet]. World Health Organization. [cited 2018 Aug 3]. Available from: <http://www.who.int/news-room/fact-sheets/detail/tobacco>
12. Commar A, Prasad VK, Tursan d’Espaignet E, Wolfenden L, Weltgesundheitsorganisation. WHO global report on trends in prevalence of tobacco smoking 2000-2025. 2018.
13. World Health Organization. WHO global report on trends in prevalence of tobacco smoking, 2015. [Internet]. 2015 [cited 2018 Aug 2]. Available from: [http://apps.who.int/iris/bitstream/10665/156262/1/9789241564922\\_eng.pdf](http://apps.who.int/iris/bitstream/10665/156262/1/9789241564922_eng.pdf)
14. Reynolds NR. Cigarette smoking and HIV: More evidence for action. *AIDS Educ Prev Off Publ Int Soc AIDS Educ*. 2009 Jun;21(3 Suppl):106–21.
15. Agoudavi K, Ministère de la Santé, Togo. Rapport Final de l’enquête STEPS Togo 2010 [Internet]. Ministère de la Santé Togo; 2012. Available from: [http://www.who.int/ncds/surveillance/steps/2010STEPS\\_Report\\_Togo\\_FR.pdf](http://www.who.int/ncds/surveillance/steps/2010STEPS_Report_Togo_FR.pdf)
16. Conseil National de Lutte contre le sida et les infections sexuellement transmissibles, République du Togo. Estimation de la taille et cartographie des sites des hommes ayant des

- 1  
2  
3 rapports sexuels avec d'autres hommes et des Professionnelles de sexe [Internet]. Republique du  
4 Togo; 2015. Available from: [http://cnlstogo.org/download/cartographies/Rapport-Estimation-de-](http://cnlstogo.org/download/cartographies/Rapport-Estimation-de-la-taille-et-cartographie-HSH-et-PS-Togo_30_06_15-OK.pdf)  
5 [la-taille-et-cartographie-HSH-et-PS-Togo\\_30\\_06\\_15-OK.pdf](http://cnlstogo.org/download/cartographies/Rapport-Estimation-de-la-taille-et-cartographie-HSH-et-PS-Togo_30_06_15-OK.pdf)  
6
- 7 17. Malekinejad M, Johnston L, Kendall C, Kerr L, Rifkin M, Rutherford G. Using respondent-  
8 driven sampling methodology for HIV biological and behavioral surveillance in international  
9 settings: a systematic review. *AIDS Behav.* 2008;12(4 Suppl):S105-30.  
10
- 11 18. Heckathorn D. Respondent-drive sampling: A new approach to the study of hidden populations.  
12 *Soc Probl.* 1997;44(2):174-99.  
13
- 14 19. Cáceres CF, Aggleton P, Galea JT. Sexual diversity, social inclusion and HIV/AIDS. *AIDS*  
15 *Lond Engl.* 2008 Aug;22(Suppl 2):S45-55.  
16
- 17 20. Ross MW, Kajubi P, Mandel JS, McFarland W, Raymond HF. Internalized  
18 homonegativity/homophobia is associated with HIV-risk behaviours among Ugandan gay and  
19 bisexual men. *Int J STD AIDS.* 2013 May;24(5):409-13.  
20
- 21 21. Jaquet A, Nouaman M, Tine J, Tanon A, Anoma C, Inwoley A, et al. Hepatitis B treatment  
22 eligibility in West Africa: uncertainties and need for prospective cohort studies. *Liver Int Off J*  
23 *Int Assoc Study Liver.* 2017 Aug;37(8):1116.  
24
- 25 22. Babor TF, Higgins-Biddle JC, Saunders JB, Monteiro MG. The Alcohol Use Disorders  
26 Identification Test: Guidelines for Use in Primary Care [Internet]. World Health Organization  
27 (WHO); p. 41. Available from:  
28 [http://apps.who.int/iris/bitstream/handle/10665/67205/WHO\\_MSD\\_MSB\\_01.6a.pdf;jsessionid=](http://apps.who.int/iris/bitstream/handle/10665/67205/WHO_MSD_MSB_01.6a.pdf;jsessionid=3743A977A779D807D1894679A3E91DD3?sequence=1)  
29 [3743A977A779D807D1894679A3E91DD3?sequence=1](http://apps.who.int/iris/bitstream/handle/10665/67205/WHO_MSD_MSB_01.6a.pdf;jsessionid=3743A977A779D807D1894679A3E91DD3?sequence=1)  
30  
31
- 32 23. Global Adult Tobacco Survey Collaborative Group, Centers for Disease Control and Prevention  
33 (CDC). Tobacco Questions for Surveys: A subset of key questions for the Global Adult Tobacco  
34 Survey (GATS) [Internet]. Atlanta, Georgia: Centers for Disease Control and Prevention; 2011.  
35 Available from: [http://www.who.int/tobacco/surveillance/en\\_tfi\\_tqs.pdf](http://www.who.int/tobacco/surveillance/en_tfi_tqs.pdf)  
36
- 37 24. Kessler RC, Andrews G, Colpe LJ, Hiripi E, Mroczek DK, Normand SLT, et al. Short screening  
38 scales to monitor population prevalences and trends in non-specific psychological distress.  
39 *Psychol Med.* 2002 Aug;32(6):959-76.  
40
- 41 25. Amon J, Brown T, Hogle J, MacNeil J, Magnani R, Mills S, et al. Guidelines for repeated  
42 behavioral surveys in populations at risk of HIV. :358.  
43
- 44 26. Foxcroft DR, Smith LA, Thomas H, Howcutt S. Accuracy of Alcohol Use Disorders  
45 Identification Test for detecting problem drinking in 18-35 year-olds in England: method  
46 comparison study. *Alcohol Alcohol Oxf Oxf.* 2015 Mar;50(2):244-50.  
47
- 48 27. Gache P, Michaud P, Landry U, Accietto C, Arfaoui S, Wenger O, et al. The Alcohol Use  
49 Disorders Identification Test (AUDIT) as a screening tool for excessive drinking in primary  
50 care: reliability and validity of a French version. *Alcohol Clin Exp Res.* 2005 Nov;29(11):2001-  
51 7.  
52
- 53 28. Andrews G, Slade T. Interpreting scores on the Kessler Psychological Distress Scale (K10). *Aust*  
54 *N Z J Public Health.* 2001 Dec;25(6):494-7.  
55
- 56 29. Korhonen C, Kimani M, Wahome E, Otieno F, Okall D, Bailey RC, et al. Depressive symptoms  
57 and problematic alcohol and other substance use in 1476 gay, bisexual, and other MSM at three  
58 research sites in Kenya. *AIDS Lond Engl.* 2018 Jul 17;32(11):1507-15.  
59  
60



- 1
- 2
- 3 30. Liu Y, Ruan Y, Strauss SM, Yin L, Liu H, Amico KR, et al. Alcohol misuse, risky sexual
- 4 behaviors, and HIV or syphilis infections among Chinese men who have sex with men. *Drug*
- 5 *Alcohol Depend.* 2016 Nov 1;168:239–46.
- 6
- 7 31. Weiss HA, Vandepitte J, Bukonya JN, Mayanja Y, Nakubulwa S, Kamali A, et al. High Levels
- 8 of Persistent Problem Drinking in Women at High Risk for HIV in Kampala, Uganda: A
- 9 Prospective Cohort Study. *Int J Environ Res Public Health* [Internet]. 2016 Feb [cited 2018 Sep
- 10 20];13(2). Available from: <https://www.ncbi.nlm.nih.gov/pmc/articles/PMC4772173/>
- 11
- 12 32. Petoumenos K, Law MG. Smoking, alcohol and illicit drug use effects on survival in HIV-
- 13 positive persons. *Curr Opin HIV AIDS.* 2016;11(5):514–20.
- 14
- 15 33. Jaquet A, Ekouevi D-K, Aboubakrine M, Bashi J, Messou E, Maiga M, et al. Tobacco use and its
- 16 determinants in HIV-infected patients on antiretroviral therapy in West African countries. *Int J*
- 17 *Tuberc Lung Dis.* 2009 Nov;13(11):1433–9.
- 18
- 19 34. Schneider M, Chersich M, Temmerman M, Degomme O, Parry CD. The impact of alcohol on
- 20 HIV prevention and treatment for South Africans in primary healthcare. *Curationis.* 2014 Aug
- 21 1;37(1):1137.
- 22
- 23 35. Wray TB, Grin B, Dorfman L, Glynn TR, Kahler C. Systematic Review of Interventions to
- 24 Reduce Problematic Alcohol Use in Men who have Sex with Men. *Drug Alcohol Rev.*
- 25 2016;35(2):148–57.
- 26
- 27 36. Yi S, Tuot S, Chhoun P, Pal K, Choub SC, Mburu G. Mental health among men who have sex
- 28 with men in Cambodia: Implications for integration of mental health services within HIV
- 29 programmes. *Int J Equity Health.* 2016 Mar 24;15:53.
- 30
- 31 37. Stoloff K, Joska JA, Feast D, De Swardt G, Hugo J, Struthers H, et al. A description of common
- 32 mental disorders in men who have sex with men (MSM) referred for assessment and intervention
- 33 at an MSM clinic in Cape Town, South Africa. *AIDS Behav.* 2013 May;17 Suppl 1:S77-81.
- 34
- 35 38. Patel S, Saggurti N, Pachauri S, Prabhakar P. Correlates of Mental Depression Among Female
- 36 Sex Workers in Southern India. *Asia Pac J Public Health.* 2015;27(8):809–19.
- 37
- 38 39. Nakimuli-Mpungu E, Mutamba B, Othengo M, Musisi S. Psychological distress and adherence
- 39 to highly active anti-retroviral therapy (HAART) in Uganda: A pilot study. *Afr Health Sci.* 2009
- 40 Aug 1;9(Suppl 1):S2–7.
- 41
- 42 40. Ye S, et al. Efficacy of peer-led interventions to reduce unprotected anal intercourse among men
- 43 who have sex with men: a meta-analysis. - PubMed - NCBI. *PLOS ONE* [Internet]. 2014 [cited
- 44 2018 Nov 5];9(3). Available from: <https://www.ncbi.nlm.nih.gov/pubmed/24614809>
- 45
- 46 41. Shangani S, et al. Effectiveness of peer-led interventions to increase HIV testing among men
- 47 who have sex with men: a systematic review and meta-analysis. - PubMed - NCBI. *AIDS Care*
- 48 [Internet]. 2017 [cited 2018 Nov 5];29(8). Available from:
- 49 <https://www.ncbi.nlm.nih.gov/pubmed/28150501>
- 50
- 51 42. Chuang D, Lacombe-Duncan A. Community engagement among men who have sex with men
- 52 living with HIV/AIDS in Taiwan. - PubMed - NCBI. *AIDS Care* [Internet]. 2016 [cited 2018
- 53 Nov 5];28(4). Available from: <https://www.ncbi.nlm.nih.gov/pubmed/26586156>
- 54
- 55 43. Joint United Nations Programme on HIV/AIDS (UNAIDS). The Western and Central Africa
- 56 Catch-up plan: Putting HIV treatment on the fast-track by 2018 [Internet]. 2017. Available from:
- 57 [https://www.unaids.org/sites/default/files/media\\_asset/WCA-catch-up-plan\\_en.pdf](https://www.unaids.org/sites/default/files/media_asset/WCA-catch-up-plan_en.pdf)
- 58
- 59
- 60

1  
2  
3  
4  
5  
6  
7  
8  
9  
10  
11  
12  
13  
14  
15  
16  
17  
18  
19  
20  
21  
22  
23  
24  
25  
26  
27  
28  
29  
30  
31  
32  
33  
34  
35  
36  
37  
38  
39  
40  
41  
42  
43  
44  
45  
46  
47  
48  
49  
50  
51  
52  
53  
54  
55  
56  
57  
58  
59  
60

For peer review only



**Table 1:** Socio-demographic and health characteristics

|                                           | <b>MSM (n=641)</b><br><b>n (%)</b> | <b>FSW (n=937)</b><br><b>n (%)</b> | <b>DU (n=537)</b><br><b>n (%)</b> | <b>Total (=2115)</b><br><b>n (%)</b> | <b>p-value</b> |
|-------------------------------------------|------------------------------------|------------------------------------|-----------------------------------|--------------------------------------|----------------|
| <b>Age (years)</b>                        |                                    |                                    |                                   |                                      | <0.001         |
| 18 – 25                                   | 442 (68.9)                         | 456 (48.7)                         | 183 (34.1)                        | 1081 (51.1)                          |                |
| > 25                                      | 199 (31.1)                         | 481 (51.3)                         | 354 (65.9)                        | 1034 (48.9)                          |                |
| <b>Sex</b>                                |                                    |                                    |                                   |                                      | <0.001         |
| Male                                      | 641 (100.0)                        | 0 (0.0)                            | 510 (95.0)                        | 1151 (54.4)                          |                |
| Female                                    | 0 (0.0)                            | 937 (100.0)                        | 27 (5.0)                          | 964 (45.6)                           |                |
| <b>Marital status</b>                     |                                    |                                    |                                   |                                      | <0.001         |
| Married                                   | 41 (6.4)                           | 130 (13.9)                         | 185 (34.5)                        | 356 (16.8)                           |                |
| Not married                               | 600 (93.6)                         | 807 (86.1)                         | 352 (65.5)                        | 1759 (83.2)                          |                |
| <b>Education level</b>                    |                                    |                                    |                                   |                                      | <0.001         |
| Never went to school                      | 1 (0.2)                            | 158 (16.8)                         | 29 (5.4)                          | 188 (8.9)                            |                |
| Primary school                            | 51 (7.9)                           | 263 (28.1)                         | 163 (30.4)                        | 477 (22.6)                           |                |
| Secondary school                          | 356 (55.5)                         | 471 (50.3)                         | 316 (58.8)                        | 1143 (54.0)                          |                |
| College/University                        | 233 (36.4)                         | 45 (4.8)                           | 29 (5.4)                          | 307 (14.5)                           |                |
| <b>Religion</b>                           |                                    |                                    |                                   |                                      | <0.001         |
| Other/ Non-believers                      | 65 (10.1)                          | 100 (10.7)                         | 98 (18.2)                         | 263 (12.4)                           |                |
| Christians                                | 522 (81.5)                         | 743 (79.3)                         | 356 (66.3)                        | 1621 (76.7)                          |                |
| Muslims                                   | 54 (8.4)                           | 94 (10.0)                          | 83 (15.5)                         | 231 (10.9)                           |                |
| <b>Place of residence</b>                 |                                    |                                    |                                   |                                      | <0.001         |
| Lomé                                      | 447 (69.7)                         | 526 (5.1)                          | 316 (58.8)                        | 1289 (60.9)                          |                |
| Other                                     | 194 (30.3)                         | 411 (43.9)                         | 221 (41.2)                        | 826 (39.1)                           |                |
| <b>Psychological distress</b>             |                                    |                                    |                                   |                                      | <0.001         |
| Likely not to have psychological distress | 497 (77.5)                         | 538 (57.4)                         | 243 (45.2)                        | 1278 (60.4)                          |                |

|                                                |            |            |            |             |        |
|------------------------------------------------|------------|------------|------------|-------------|--------|
| Likely to have mild psychological distress     | 80 (12.5)  | 223 (23.8) | 123 (22.9) | 426 (20.1)  |        |
| Likely to have moderate psychological distress | 55 (8.6)   | 117 (12.5) | 103 (19.2) | 275 (13.0)  |        |
| Likely to have severe psychological distress   | 9 (1.4)    | 59 (6.3)   | 68 (12.7)  | 136 (6.5)   |        |
| <b>HIV Infection</b>                           |            |            |            |             | <0.001 |
| Yes                                            | 131 (20.4) | 119 (12.7) | 15 (2.8)   | 265 (12.5)  |        |
| No                                             | 480 (74.9) | 787 (84.0) | 410 (76.3) | 1677 (79.3) |        |
| Not tested                                     | 30 (4.7)   | 31 (3.3)   | 112 (20.9) | 173 (8.2)   |        |

For peer review only

1  
2  
3  
4  
5  
6  
7  
8  
9  
10  
11  
12  
13  
14  
15  
16  
17  
18  
19  
20  
21  
22  
23  
24  
25  
26  
27  
28  
29  
30  
31  
32  
33  
34  
35  
36  
37  
38  
39  
40  
41  
42  
43  
44  
45  
46

For peer review only

| <b>Addictive behaviour</b> | <b>MSM (n= 641)</b> | <b>FSW(n=937)</b> | <b>DU (n=537)</b> | <b>Total (N=2115)</b> | <b>p-value</b> |
|----------------------------|---------------------|-------------------|-------------------|-----------------------|----------------|
|----------------------------|---------------------|-------------------|-------------------|-----------------------|----------------|



**Table 3:** Factors associated with hazardous alcohol consumption and binge drinking among key populations in Togo in 2017

|                        | Hazardous/harmful alcohol consumption |               |         |                       |             | Binge drinking      |               |              |                       |             |
|------------------------|---------------------------------------|---------------|---------|-----------------------|-------------|---------------------|---------------|--------------|-----------------------|-------------|
|                        | Univariate analysis                   |               |         | Multivariate analysis |             | Univariate analysis |               |              | Multivariate analysis |             |
|                        | n/N                                   | OR (95% CI)   | p-value | aOR (95% CI)          | p-value     | n/N                 | OR (95% CI)   | p-value      | aOR (95% CI)          | p-value     |
| <b>Age (years)</b>     |                                       |               |         |                       | <b>0.05</b> |                     |               |              |                       | <b>0.05</b> |
| 18 – 25                | 351/1081                              | 1             |         | 1                     |             | 433/1081            | 1             |              | 1                     |             |
| >25                    | 462/1034                              | 1.7 (1.4-2.0) | 0.001   | 1.3 (1.1-1.6)         | 0.05        | 529/1034            | 1.6 (1.3-1.9) | 0.001        | 1.3 (1.1-1.6)         | 0.01        |
| <b>Marital status</b>  |                                       |               |         |                       | 0.97        |                     |               |              |                       |             |
| Not married            | 641/1759                              | 1             |         | 1                     |             | 777/1759            | 1             |              |                       |             |
| Married                | 172/356                               | 1.6 (1.302.1) | 0.001   | 1.0 (0.8-1.3)         |             | 185/356             | 1.4 (1.1-1.7) | 0.001        |                       |             |
| <b>Education level</b> |                                       |               | 0.001   |                       | 0.19        |                     |               | <b>0.001</b> |                       | <b>0.01</b> |

|    |                                                |          |                |       |                |              |          |               |              |                |       |
|----|------------------------------------------------|----------|----------------|-------|----------------|--------------|----------|---------------|--------------|----------------|-------|
| 1  |                                                |          |                |       |                |              |          |               |              |                |       |
| 2  |                                                |          |                |       |                |              |          |               |              |                |       |
| 3  | Never been to school                           | 64/188   | 1              |       | 1              |              | 69/188   | 1             |              | 1              |       |
| 4  | Primary school                                 | 232/477  | 1.8 (1.3-2.6)  | 0.001 | 1.50 (1.0-2.2) | 0.05         | 256/477  | 2.0 (1.4-2.8) | 0.001        | 1.6 (1.1-2.4)  | 0.01  |
| 5  | Secondary school                               | 436/1143 | 1.2 (0.9-1.7)  | 0.283 | 1.3 (0.9-1.8)  | 0.26         | 517/1143 | 1.4 (1.0-2.0) | 0.05         | 1.5 (1.0-2.1)  | 0.05  |
| 6  | University                                     | 81/307   | 0.7 (0.5- 1.0) | 0.10  | 1.3 (0.8-2.2)  | 0.21         | 120/307  | 1.1 (0.8-1.6) | 0.60         | 2.1 (1.3-3.3)  | 0.01  |
| 7  |                                                |          |                |       |                |              |          |               |              |                |       |
| 8  |                                                |          |                |       |                |              |          |               |              |                |       |
| 9  |                                                |          |                |       |                |              |          |               |              |                |       |
| 10 | <b>Religion</b>                                |          |                | 0.001 |                | <b>0.001</b> |          |               | <b>0.001</b> | <b>0.001</b>   |       |
| 11 | Others/ Non-believers                          | 56/112   | 1              |       | 1              |              | 151/263  | 1             |              | 1              |       |
| 12 | Christians                                     | 596/1621 | 0.5 (0.4-0.7)  | 0.001 | 0.7 (0.5-0.9)  | 0.05         | 718/1621 | 0.6 (0.5-0.8) | 0.001        | 0.71 (0.5-1.0) | 0.05  |
| 13 | Muslims                                        | 80/231   | 0.5 (0.3-0.7)  | 0.001 | 0.4 (0.3-0.6)  | 0.001        | 93/231   | 0.5 (0.4-0.7) | 0.001        | 0.4 (0.3-0.7)  | 0.001 |
| 14 |                                                |          |                |       |                |              |          |               |              |                |       |
| 15 |                                                |          |                |       |                |              |          |               |              |                |       |
| 16 | <b>Place of residence</b>                      |          |                |       |                | <b>0.001</b> |          |               |              | <b>0.001</b>   |       |
| 17 | Lomé                                           | 392/1289 | 1              |       | 1              |              | 486/1289 | 1             |              | 1              |       |
| 18 | Others                                         | 421/826  | 2.4 (2.0-2.9)  | 0.001 | 2.8 (2.2-3.4)  | 0.001        | 476/826  | 2.3 (1.9-2.7) | 0.001        | 2.5 (2.0-3.0)  | 0.001 |
| 19 |                                                |          |                |       |                |              |          |               |              |                |       |
| 20 |                                                |          |                |       |                |              |          |               |              |                |       |
| 21 | <b>Tobacco use</b>                             |          |                |       |                | <b>0.001</b> |          |               |              | <b>0.001</b>   |       |
| 22 | No                                             | 423/1468 | 1              |       | 1              |              | 533/1468 | 1             |              | 1              |       |
| 23 | Yes                                            | 390/647  | 3.8 (3.1-4.6)  | 0.001 | 2.6 (2.0-3.4)  | 0.001        | 429/647  | 3.5 (2.8-4.2) | 0.001        | 2.6 (2.0-3.4)  | 0.001 |
| 24 |                                                |          |                |       |                |              |          |               |              |                |       |
| 25 |                                                |          |                |       |                |              |          |               |              |                |       |
| 26 | <b>Psychological distress</b>                  |          |                | 0.001 |                | <b>0.001</b> |          |               | <b>0.001</b> | <b>0.001</b>   |       |
| 27 | Likely to not have psychological distress      | 387/1278 | 1              |       | 1              |              | 491/1278 | 1             |              | 1              |       |
| 28 | Likely to have mild psychological distress     | 174/426  | 1.6 (1.3-2.0)  | 0.001 | 1.2 (0.9-1.5)  | 0.20         | 220/426  | 1.7 (1.4-2.1) | 0.001        | 1.4 (1.1-1.7)  | 0.05  |
| 29 | Likely to have moderate psychological distress | 159/275  | 3.2 (2.4-4.1)  | 0.001 | 2.5 (1.9-3.4)  | 0.001        | 160/275  | 2.2 (1.7-2.9) | 0.001        | 1.8 (1.3-2.4)  | 0.001 |
| 30 | Likely to have severe psychological distress   | 93/136   | 5.0 (3.4-7.4)  | 0.001 | 3.3 (2.2-5.1)  | 0.001        | 91/136   | 3.2 (2.2-4.8) | 0.001        | 2.2 (1.5-3.4)  | 0.001 |
| 31 |                                                |          |                |       |                |              |          |               |              |                |       |
| 32 |                                                |          |                |       |                |              |          |               |              |                |       |
| 33 |                                                |          |                |       |                |              |          |               |              |                |       |
| 34 | <b>HIV infection</b>                           |          |                | 0.001 |                | <b>0.05</b>  |          |               | <b>0.001</b> | <b>0.05</b>    |       |
| 35 | No                                             | 665/1677 | 1              |       | 1              |              | 784/1677 | 1             |              | 1              |       |
| 36 | Yes                                            | 67/265   | 0.5 (0.4-0.7)  | 0.001 | 0.7 (0.5-1.0)  | 0.05         | 84/265   | 0.5 (0.4-0.7) | 0.001        | 0.7 (0.5-1.0)  | 0.05  |
| 37 |                                                |          |                |       |                |              |          |               |              |                |       |
| 38 |                                                |          |                |       |                |              |          |               |              |                |       |
| 39 |                                                |          |                |       |                |              |          |               |              |                |       |
| 40 |                                                |          |                |       |                |              |          |               |              |                |       |
| 41 |                                                |          |                |       |                |              |          |               |              |                |       |
| 42 |                                                |          |                |       |                |              |          |               |              |                |       |
| 43 |                                                |          |                |       |                |              |          |               |              |                |       |
| 44 |                                                |          |                |       |                |              |          |               |              |                |       |
| 45 |                                                |          |                |       |                |              |          |               |              |                |       |
| 46 |                                                |          |                |       |                |              |          |               |              |                |       |

|                       |         |               |              |               |              |         |               |              |               |              |
|-----------------------|---------|---------------|--------------|---------------|--------------|---------|---------------|--------------|---------------|--------------|
| Not completed         | 81/173  | 1.3 (1.0-1.8) | 0.10         | 1.2 (0.8-1.8) | 0.30         | 94/173  | 1.4 (1.0-1.9) | 0.10         | 1.2 (0.9-1.8) | 0.26         |
| <b>Key population</b> |         |               | <b>0.001</b> |               | <b>0.001</b> |         |               | <b>0.001</b> |               | <b>0.001</b> |
| MSM                   | 134/641 | 1             |              | 1             |              | 196/641 | 1             |              | 1             |              |
| FSW                   | 344/937 | 2.2 (1.7-2.8) | 0.001        | 1.8 (1.4-2.4) | 0.001        | 406/937 | 1.7 (1.4-2.2) | 0.001        | 1.6 (1.3-2.1) | 0.001        |
| DU                    | 335/537 | 6.3 (4.9-8.2) | 0.001        | 2.4 (1.7-3.4) | 0.01         | 20/27   | 4.6 (3.6-5.9) | 0.001        | 2.0 (1.4-2.8) | 0.001        |

aOR: adjusted odds ratio; OR: odds ratio; 95%CI: 95% confidence interval; FDU: female drug user; MDU: male drug user; FSW: female sex worker; MSM: men who have sex with men

For peer review only

**Table 4.** Factors associated with tobacco use among key populations in Togo in 2017

|                                           | Univariate analysis |                |         | Multivariate analysis |              |
|-------------------------------------------|---------------------|----------------|---------|-----------------------|--------------|
|                                           | n/N                 | OR (95% CI)    | p-value | aOR (95% CI)          | p-value      |
| <b>Age (years)</b>                        |                     |                |         |                       | 0.14         |
| 18 – 25                                   | 280/1081            | 1              |         | 1                     |              |
| >25                                       | 367/1034            | 1.6 (1.3 -1.9) | 0.001   | 0.81 (0.6-1.1)        | 0.15         |
| <b>Marital status</b>                     |                     |                |         |                       | 0.22         |
| Not married                               | 481/1759            | 1              |         | 1                     |              |
| Married                                   | 356                 | 2.3 (1.8-2.9)  | 0.001   | 0.8 (0.6-1.1)         | 0.22         |
| <b>Level of education</b>                 |                     |                | 0.001   |                       | 0.32         |
| None                                      | 42/188              | 1              |         | 1                     |              |
| Primary school                            | 186/477             | 2.2 (1.5-3.3)  | 0.001   | 1.3 (0.8-2.3)         | 0.26         |
| Secondary/high school                     | 364/1143            | 1.6 (1.1-2.4)  | 0.01    | 1.2 (0.7-1.9)         | 0.59         |
| University                                | 55/307              | 0.8 (0.5-1.2)  | 0.230   | 0.9 (0.5-1.7)         | 0.73         |
| <b>Religion</b>                           |                     |                | 0.001   |                       | <b>0.05</b>  |
| Others/ Non-believers                     | 40/112              | 1              |         | 1                     |              |
| Christians                                | 436/1621            | 0.5 (0.4-0.6)  | 0.001   | 0.7 (0.5-1.0)         | 0.10         |
| Muslims                                   | 96/231              | 0.9 (0.6-1.3)  | 0.63    | 1.1 (0.7-1.9)         | 0.60         |
| <b>Place of residence</b>                 |                     |                |         |                       | <b>0.001</b> |
| Lomé                                      | 400/1289            | 1              |         | 1                     |              |
| Others                                    | 247/826             | 1.0 (0.8-1.2)  | 0.59    | 0.6 (0.5-0.8)         | 0.001        |
| <b>Alcohol consumption</b>                |                     |                |         |                       | <b>0.001</b> |
| No risky consumption                      | 257/1302            | 1              |         | 1                     |              |
| Hazardous/harmful drinking                | 390/813             | 3.8 (3.1-4.6)  | 0.001   | 2.6 (2.0-3.4)         | 0.001        |
| <b>Psychological distress</b>             |                     |                | 0.001   |                       | <b>0.01</b>  |
| Likely to not have psychological distress | 300/1278            | 1              |         | 1                     |              |



|                                                |          |                  |       |                  |              |
|------------------------------------------------|----------|------------------|-------|------------------|--------------|
| Likely to have mild psychological distress     | 150/426  | 1.8 (1.4-2.2)    | 0.001 | 1.5 (1.1-2.1)    | 0.01         |
| Likely to have moderate psychological distress | 128/275  | 2.8 (2.2-3.7)    | 0.001 | 2.0 (1.3-2.8)    | 0.001        |
| Likely to have severe psychological distress   | 69/136   | 3.4 (2.3-4.8)    | 0.001 | 1.3 (0.8-2.2)    | 0.30         |
| <b>HIV infection</b>                           |          |                  | 0.001 |                  | 0.34         |
| No                                             | 509/1677 | 1                |       | 1                |              |
| Yes                                            | 44/265   | 0.5 (0.3-0.6)    | 0.001 | 0.9 (0.6-1.3)    | 0.51         |
| Not completed                                  | 94/173   | 2.7 (2.0-3.8)    | 0.001 | 0.7 (0.5-1.2)    | 0.17         |
| <b>Key populations</b>                         |          |                  | 0.001 |                  | <b>0.001</b> |
| MSM                                            | 97/641   | 1                |       | 1                |              |
| FSW                                            | 116/937  | 0.8 (0.6-1.1)    | 0.12  | 0.6 (0.4-0.9)    | 0.01         |
| DU                                             | 434/537  | 23.6 (17.5-32.2) | 0.001 | 17.9 (12.4-26.4) | 0.001        |

aOR: adjusted odds ratio; OR: odds ratio; 95%CI: 95% confidence interval; FDU: female drug user; MDU: male drug user;  
 FSW: female sex worker; MSM: men who have sex with men

1  
2  
3  
4  
5  
6  
7  
8  
9  
10  
11  
12  
13  
14  
15  
16  
17  
18  
19  
20  
21  
22  
23  
24  
25  
26  
27  
28  
29  
30  
31  
32  
33  
34  
35  
36  
37  
38  
39  
40  
41  
42  
43  
44  
45  
46

For peer review only

STROBE Statement—Checklist of items that should be included in reports of *cross-sectional studies*

|                              | Item No | Recommendation                                                                                                                                                                                               |     | Pages    |
|------------------------------|---------|--------------------------------------------------------------------------------------------------------------------------------------------------------------------------------------------------------------|-----|----------|
| <b>Title and abstract</b>    | 1       | (a) Indicate the study's design with a commonly used term in the title or the abstract                                                                                                                       | X   | 1        |
|                              |         | (b) Provide in the abstract an informative and balanced summary of what was done and what was found                                                                                                          | X   | 2        |
| <b>Introduction</b>          |         |                                                                                                                                                                                                              |     |          |
| Background/rationale         | 2       | Explain the scientific background and rationale for the investigation being reported                                                                                                                         | X   | 4        |
| Objectives                   | 3       | State specific objectives, including any prespecified hypotheses                                                                                                                                             | X   | 4        |
| <b>Methods</b>               |         |                                                                                                                                                                                                              |     |          |
| Study design                 | 4       | Present key elements of study design early in the paper                                                                                                                                                      | X   | 6        |
| Setting                      | 5       | Describe the setting, locations, and relevant dates, including periods of recruitment, exposure, follow-up, and data collection                                                                              | X   | 6        |
| Participants                 | 6       | (a) Give the eligibility criteria, and the sources and methods of selection of participants                                                                                                                  | X   | 6        |
| Variables                    | 7       | Clearly define all outcomes, exposures, predictors, potential confounders, and effect modifiers. Give diagnostic criteria, if applicable                                                                     | X   | 6-7      |
| Data sources/<br>measurement | 8*      | For each variable of interest, give sources of data and details of methods of assessment (measurement). Describe comparability of assessment methods if there is more than one group                         | X   | 6-7      |
| Bias                         | 9       | Describe any efforts to address potential sources of bias                                                                                                                                                    | X   | 6        |
| Study size                   | 10      | Explain how the study size was arrived at                                                                                                                                                                    | X   | 6        |
| Quantitative variables       | 11      | Explain how quantitative variables were handled in the analyses. If applicable, describe which groupings were chosen and why                                                                                 | X   | 7        |
| Statistical methods          | 12      | (a) Describe all statistical methods, including those used to control for confounding                                                                                                                        | X   | 7        |
|                              |         | (b) Describe any methods used to examine subgroups and interactions                                                                                                                                          | X   | 7        |
|                              |         | (c) Explain how missing data were addressed                                                                                                                                                                  | N/A |          |
|                              |         | (d) If applicable, describe analytical methods taking account of sampling strategy                                                                                                                           | N/A |          |
|                              |         | (e) Describe any sensitivity analyses                                                                                                                                                                        | N/A |          |
| <b>Results</b>               |         |                                                                                                                                                                                                              |     |          |
| Participants                 | 13*     | (a) Report numbers of individuals at each stage of study—eg numbers potentially eligible, examined for eligibility, confirmed eligible, included in the study, completing follow-up, and analysed            | X   | 8        |
|                              |         | (b) Give reasons for non-participation at each stage                                                                                                                                                         | N/A |          |
|                              |         | (c) Consider use of a flow diagram                                                                                                                                                                           | N/A |          |
| Descriptive data             | 14*     | (a) Give characteristics of study participants (eg demographic, clinical, social) and information on exposures and potential confounders                                                                     | X   | 8; 18-19 |
|                              |         | (b) Indicate number of participants with missing data for each variable of interest                                                                                                                          | N/A |          |
| Outcome data                 | 15*     | Report numbers of outcome events or summary measures                                                                                                                                                         | X   | 8        |
| Main results                 | 16      | (a) Give unadjusted estimates and, if applicable, confounder-adjusted estimates and their precision (eg, 95% confidence interval). Make clear which confounders were adjusted for and why they were included | X   | 8-9      |

|                          |    |                                                                                                                                                                            |     |       |
|--------------------------|----|----------------------------------------------------------------------------------------------------------------------------------------------------------------------------|-----|-------|
|                          |    | (b) Report category boundaries when continuous variables were categorized                                                                                                  | X   | 8-9   |
|                          |    | (c) If relevant, consider translating estimates of relative risk into absolute risk for a meaningful time period                                                           | N/A |       |
| Other analyses           | 17 | Report other analyses done—eg analyses of subgroups and interactions, and sensitivity analyses                                                                             | N/A |       |
| <b>Discussion</b>        |    |                                                                                                                                                                            |     |       |
| Key results              | 18 | Summarise key results with reference to study objectives                                                                                                                   | X   | 10    |
| Limitations              | 19 | Discuss limitations of the study, taking into account sources of potential bias or imprecision. Discuss both direction and magnitude of any potential bias                 | X   | 11    |
| Interpretation           | 20 | Give a cautious overall interpretation of results considering objectives, limitations, multiplicity of analyses, results from similar studies, and other relevant evidence | X   | 10    |
| Generalisability         | 21 | Discuss the generalisability (external validity) of the study results                                                                                                      | X   | 10-11 |
| <b>Other information</b> |    |                                                                                                                                                                            |     |       |
| Funding                  | 22 | Give the source of funding and the role of the funders for the present study and, if applicable, for the original study on which the present article is based              | X   | 13    |

\*Give information separately for exposed and unexposed groups.

**Note:** An Explanation and Elaboration article discusses each checklist item and gives methodological background and published examples of transparent reporting. The STROBE checklist is best used in conjunction with this article (freely available on the Web sites of PLoS Medicine at <http://www.plosmedicine.org/>, Annals of Internal Medicine at <http://www.annals.org/>, and Epidemiology at <http://www.epidem.com/>). Information on the STROBE Initiative is available at [www.strobe-statement.org](http://www.strobe-statement.org).

# BMJ Open

## PREVALENCE AND CORRELATES OF ALCOHOL AND TOBACCO USE AMONG KEY POPULATIONS IN TOGO IN 2017: A CROSS-SECTIONAL STUDY

|                                 |                                                                                                                                                                                                                                                                                                                                                                                                                                                                                                                                                                                                                                                                                                                                                                                                                                                                                                                                                                                                                                                                                                                                                                                                                                                                         |
|---------------------------------|-------------------------------------------------------------------------------------------------------------------------------------------------------------------------------------------------------------------------------------------------------------------------------------------------------------------------------------------------------------------------------------------------------------------------------------------------------------------------------------------------------------------------------------------------------------------------------------------------------------------------------------------------------------------------------------------------------------------------------------------------------------------------------------------------------------------------------------------------------------------------------------------------------------------------------------------------------------------------------------------------------------------------------------------------------------------------------------------------------------------------------------------------------------------------------------------------------------------------------------------------------------------------|
| Journal:                        | <i>BMJ Open</i>                                                                                                                                                                                                                                                                                                                                                                                                                                                                                                                                                                                                                                                                                                                                                                                                                                                                                                                                                                                                                                                                                                                                                                                                                                                         |
| Manuscript ID                   | bmjopen-2019-028934.R3                                                                                                                                                                                                                                                                                                                                                                                                                                                                                                                                                                                                                                                                                                                                                                                                                                                                                                                                                                                                                                                                                                                                                                                                                                                  |
| Article Type:                   | Research                                                                                                                                                                                                                                                                                                                                                                                                                                                                                                                                                                                                                                                                                                                                                                                                                                                                                                                                                                                                                                                                                                                                                                                                                                                                |
| Date Submitted by the Author:   | 06-Sep-2019                                                                                                                                                                                                                                                                                                                                                                                                                                                                                                                                                                                                                                                                                                                                                                                                                                                                                                                                                                                                                                                                                                                                                                                                                                                             |
| Complete List of Authors:       | Bitty-Anderson, Alexandra; PACCI Research Center - Site ANRS Côte d'Ivoire<br>GBEASOR-KOMLANVI, Fifonsi Adjidossi; Université de Lomé Faculté des Sciences de la Santé; Centre Africain de Recherches en Epidémiologie et en Santé Publique (CARESP)<br>Johnson, Pascal; Centre Africain de Recherches en Epidémiologie et en Santé Publique (CARESP)<br>Sewu, Essèboè; Centre Africain de Recherches en Epidémiologie et en Santé Publique (CARESP)<br>Dagnra, Claver; Université de Lomé Laboratoire de Biologie Moléculaire Salou, Mounerou; Université de Lomé Laboratoire de Biologie Moléculaire Blatome, Tetouyaba; Centre Africain de Recherches en Epidémiologie et en Santé Publique (CARESP)<br>Jaquet, Antoine; INSERM U1219 Bordeaux Population Health Research Université de Bordeaux; Université de Bordeaux Institut de Santé Publique Epidémiologie et Développement<br>Coffie, Patrick; Université de Bordeaux Institut de Santé Publique Epidémiologie et Développement; Université Felix Houphouët-Boigny Unité de Formation et de Recherche des Sciences Médicales, Dermatologie et Infectiologie<br>Ekouevi, Didier; Université de Lomé Faculté des Sciences de la Santé; INSERM U1219 Bordeaux Population Health Research Université de Bordeaux |
| <b>Primary Subject Heading</b>: | HIV/AIDS                                                                                                                                                                                                                                                                                                                                                                                                                                                                                                                                                                                                                                                                                                                                                                                                                                                                                                                                                                                                                                                                                                                                                                                                                                                                |
| Secondary Subject Heading:      | Public health                                                                                                                                                                                                                                                                                                                                                                                                                                                                                                                                                                                                                                                                                                                                                                                                                                                                                                                                                                                                                                                                                                                                                                                                                                                           |
| Keywords:                       | EPIDEMIOLOGY, HIV & AIDS < INFECTIOUS DISEASES, Public health < INFECTIOUS DISEASES, Substance misuse < PSYCHIATRY, Key Populations                                                                                                                                                                                                                                                                                                                                                                                                                                                                                                                                                                                                                                                                                                                                                                                                                                                                                                                                                                                                                                                                                                                                     |
|                                 |                                                                                                                                                                                                                                                                                                                                                                                                                                                                                                                                                                                                                                                                                                                                                                                                                                                                                                                                                                                                                                                                                                                                                                                                                                                                         |

SCHOLARONE™  
Manuscripts

1  
2  
3  
4  
5  
6  
7  
8  
9  
10  
11  
12  
13  
14  
15  
16  
17  
18  
19  
20  
21  
22  
23  
24  
25  
26  
27  
28  
29  
30  
31  
32  
33  
34  
35  
36  
37  
38  
39  
40  
41  
42  
43  
44  
45  
46  
47  
48  
49  
50  
51  
52  
53  
54  
55  
56  
57  
58  
59  
60

1  
2  
3 **PREVALENCE AND CORRELATES OF ALCOHOL AND TOBACCO USE AMONG KEY**  
4 **POPULATIONS IN TOGO IN 2017: A CROSS-SECTIONAL STUDY**  
5  
6  
7

8 Alexandra M BITTY-ANDERSON<sup>1</sup>, Fifonsi A GBEASOR-KOMLANVI<sup>2,3</sup>, Pascal JOHNSON<sup>3</sup>  
9 Essèboè K SEWU<sup>3</sup>, Claver A DAGNRA<sup>4</sup>, Mounerou SALOU<sup>4</sup>, Tetouyaba J BLATOME<sup>3</sup>, Antoine  
10 JAQUET<sup>5,6</sup>, Patrick A COFFIE<sup>6,7,8</sup>, Didier K EKOUEVI<sup>1,2,3,5,6</sup>, §

- 11  
12  
13  
14  
15 1. Programme PACCI – Site ANRS Côte d’Ivoire, CHU de Treichville, Abidjan, Côte d’Ivoire  
16  
17  
18 2. Université de Lomé, Faculté des Sciences de la Santé, Département de Santé Publique, Lomé, Togo  
19  
20  
21 3. Centre Africain de Recherches en Epidémiologie et en Santé Publique (CARESP), Lomé, Togo  
22  
23  
24 4. Université de Lomé, Laboratoire de Biologie Moléculaire, Département des Sciences  
25 Fondamentales, Lomé, Togo  
26  
27  
28 5. INSERM U1219, Bordeaux Population Health Research, ISPED, Université de Bordeaux,  
29 Bordeaux, France  
30  
31  
32 6. Université de Bordeaux, Institut de Santé Publique Epidémiologie Développement (ISPED),  
33 Bordeaux, France  
34  
35  
36 7. Université Félix Houphouët Boigny, Département de Dermatologie et d’Infectiologie, UFR des  
37 Sciences Médicales, Abidjan, Côte d’Ivoire  
38  
39  
40 8. CHU de Treichville, Service de maladies infectieuses et tropicales, Abidjan, Côte d’Ivoire  
41  
42  
43  
44  
45  
46  
47

48 **\*Word Count** (excluding title page, abstract, references, figures and tables): 4,112  
49

50 **§ Corresponding Author:**

51 Didier Koumavi EKOUEVI, MD, PhD

52 Université de Lomé (Togo)

53 Faculté des Sciences de la Santé

54 Département de Santé Publique

55 Cell: +228 93136655

56 Email: [didier.ekouevi@gmail.com](mailto:didier.ekouevi@gmail.com)  
57  
58  
59  
60

## Abstract

### Objectives

The aim of this study was to estimate alcohol and tobacco use prevalence and their correlates among female sex workers (FSW), men who have sex with men (MSM) and drug users (DU) in Togo.

### Design, setting and participants

A cross-sectional bio-behavioral study was conducted among 2,115 MSM, FSW and DU in 2017 using a respondent-driven sampling (RDS) method, in the eight biggest towns of Togo. Selection criteria for the MSM were being male and having had oral or anal intercourse with a man in the previous 12 months; for FSW, being a female and having exchanged sex for money in the previous 12 months; and for DU, consuming heroin, cocaine or hashish for MSM, FSW and DU, respectively. All participants had to be at least 18 years old and residing in the territory for the past three months.

### Results

The prevalence of alcohol consumption, hazardous/harmful consumption and binge drinking was 64.8%, 38.4%, and 45.5%, respectively. Current tobacco use was reported by 30.6% of participants and HIV prevalence was estimated at 12.5%. DU were more likely to engage in binge drinking compared to other key populations (aOR=2.0; 95% CI = [1.4-2.8]; p= 0.001). Participants who were identified as having hazardous/harmful alcohol consumption had almost three times the odds of tobacco consumption than those with no risky consumption (aOR=2.6; 95% CI= [2.0-3.4]; p=0.001). Hazardous/harmful alcohol consumption was three times more likely among participants with severe psychological distress compared to those with no psychological distress (aOR= 3.3, 95% CI= [2.2 – 5.1]; p=0.001).

### Conclusion

Findings from this study demonstrate the need for the integration of mental health and substance abuse reduction interventions into HIV prevention programs, particularly those geared toward key populations.

**Key words:** Alcohol, tobacco, HIV, key populations, Sub-Saharan Africa.



### Strengths and limitations of this study

- This study is among the first in sub-Saharan Africa exploring the patterns of alcohol and tobacco consumption among the three main groups of key populations
- This study had a consistent sample size
- The use of internationally validated instruments to assess alcohol and tobacco consumption, as well as psychological distress minimized bias
- The main limitation of our study is that it was based on self-reported data which could be a potential source of recall bias or social desirability bias

For peer review only

## Introduction

Sub-Saharan Africa (SSA) is the region of the World the most affected by the HIV/AIDS epidemic: with only 12% of the global population, SSA accounts for an estimated 71% of the world's burden of HIV infection and 74% of world's AIDS-related deaths (1). In West and Central Africa, the HIV epidemic is described as generalized and driven by heterosexual sex with an estimated prevalence of 2.2% (1). However, in key populations, populations at higher risk of HIV such as sex workers, men who have sex with men (MSM) and injection drug users, the reported prevalence rates are disproportionately high compared to those of the general population (2,3). In Togo, HIV prevalence among key populations ranges from 11% to 13% compared to 2.1% in the general population (4). Several biological, behavioral and structural risk factors are associated with this high HIV rate among key populations: unprotected sex, presence of other Sexually Transmitted Infections (STIs), lack of access to condoms, multiple concurrent sex partners (males and females for MSM), lack of access to health care and prevention services, physical and sexual violence, challenging legal and sociopolitical environment, poverty, sociopolitical stigma and discrimination (2,3).

Other risk factors associated with sexual risk behaviors and thus contributing to HIV transmission include alcohol and tobacco consumption. Alcohol, a psychoactive substance with dependence-producing properties, has been an integral part of many cultures for several centuries (5). The harmful use of alcohol and its consequences make its consumption a public health problem. More than 200 disease and injury conditions including alcohol dependence, liver cirrhosis, cancers and injuries are the consequences of the harmful use of alcohol (5). In 2012, it was reported that 5.9% of all global deaths and 5.1% of the global burden of disease and injury were the consequences of harmful alcohol consumption (5). Recent research studies have also uncovered a causal relationship between the harmful use of alcohol and infectious diseases, including HIV (5–7). This relation could be attributed to the fact that alcohol influences cognitive abilities and decision making, and affects condom negotiation and correct condom use (8). Among key populations, particularly sex workers, alcohol consumption is seen as a sexual enhancer and work requirement which in many cases leads to an increased likelihood of unprotected sex, economic loss, interference with family responsibilities and sexual violence (7,9,10).

Tobacco consumption is also one of the biggest public health challenges of the 21<sup>st</sup> century, with a clear, causal link between tobacco use and health. It is estimated that tobacco use kills half of its users and is responsible for the death of more than 7 million people a year. Approximately 80% of tobacco users live in low and middle income countries (11). Tobacco use is one the main risk factors for lung cancer, disability and death from non-communicable chronic diseases, and also an increased risk of death from communicable diseases (12,13). For people living with HIV, tobacco use is a risk factor for HIV-related comorbidities and premature death (14). Estimates in Togo put the prevalence of alcohol and tobacco consumption at 53.7% and 8.5% respectively, in the general population (15).

1  
2  
3  
4 Both alcohol and tobacco consumption play an important role in the HIV epidemic in SSA. With key  
5 populations being an important catalyst of the HIV epidemic in SSA and particularly in West Africa, it  
6 is important that patterns of alcohol and tobacco consumption be explored among these populations.  
7  
8 However, there is a dearth of data on the consumption of addictive substances such as tobacco and  
9 alcohol among the three main key populations in SSA. Of the few studies on key populations completed  
10 in Togo, none has explored alcohol and tobacco consumption and very few studies in West Africa have  
11 explored alcohol and tobacco consumption across the three key populations. The aim of this study was  
12 to estimate the prevalence of alcohol and tobacco consumption and to assess their correlates among  
13 female sex workers (FSW), MSM and drug users (DU) in Togo.  
14  
15  
16  
17  
18  
19  
20  
21  
22  
23  
24  
25  
26  
27  
28  
29  
30  
31  
32  
33  
34  
35  
36  
37  
38  
39  
40  
41  
42  
43  
44  
45  
46  
47  
48  
49  
50  
51  
52  
53  
54  
55  
56  
57  
58  
59  
60

## Methods

### Study design, sampling and recruitment

This study was a bio-behavioral cross-sectional study conducted from August to September 2017 in Togo. Togo is a country of West Africa, with a population of 7.6 million inhabitants in 2018, covering 57,000 square kilometres with an average density of 133 inhabitants per square kilometres, an infant mortality of 45.2/ 1,000 and an estimated life expectancy of 64.5 years old. The HIV prevalence in Togo is estimated at 2.1%, with a high prevalence among key population groups (4). Togo is divided into five regions and in each region, based on the mapping and size estimation studies previously carried out in Togo (16), towns with the highest number of key populations were selected: Dapaong in the Savanes region; Kara in Kara region; Sokodé in the Centrale region; Atakpamé and Kpalimé in the Plateaux region and Tsévié, Aného and Lomé, the capital city in the Maritime region. Prior to the study, locations (associations and hot spots) specific to each group of key population were identified during preliminary visits with the help of leaders from these communities. DU and FSW were recruited in drug-dealing/consumption locations and brothels (licensed or not), respectively. MSM were recruited using a Respondent Driven Sampling (RDS) method (17,18). MSM community leaders were the first “seeds”. A total of 28 seeds were identified at first based on their roles in their community and on their representativeness. Each seed from the first wave selected had to represent at least one MSM sub-group, based on how MSM self-identify as bisexuals or gays (19,20). Each participant was then given three coupons with a unique identification code to recruit three other seeds in their network until the required sample size for each group was reached. Inclusion criteria for the three groups were being 18 years or older, living/working/studying in Togo for a minimum of 3 months at the time of the study, and being in possession of a recruitment coupon. In addition to these criteria, criteria specific to MSM were having had anal and/or oral sex with a man in the previous 12 months, for FSW having had sex in exchange for money as a compensation in the previous 12 months and for DU, consuming heroin, cocaine or hashish at the time of the study.

### Sample size estimation

The sample size estimation was based on the estimated prevalence of hazardous alcohol drinking among key populations of 9.1% (21). We also took into account the prevalence of tobacco use, with the assumption that tobacco use prevalence in the key populations would be twice that of the general population. Hence, with a tobacco use prevalence of 6.8% in the general population, the expected prevalence of tobacco use among key populations was 13.6% (15). With a precision of 3% and an assumption of 10% of missing data, the minimum sample size was estimated at 552 participants per group at a minimum. Thus, to allow a comparison between groups, the total sample size estimated for the three groups of key populations was 1,656.

## Study procedures

After eligibility screening and written informed consent approval, trained study staff (medical students) administered a structured and standardized questionnaire during a face-to-face interview. The interviews took place in the MSM community-based organizations for the MSM, for the FSW, in selected bars around the main “hot spots” from which they were recruited and for the DU, recruitment occurred in the smoking spots in the “ghettos”. The questionnaire was constructed based on validated tools such as the Alcohol Use Disorders Identification Test (AUDIT) (22) and a subset of the Tobacco Questions for Surveys (23) to assess alcohol and tobacco consumption respectively. The Kessler Psychological Distress Scale (K10) (24) was used to measure psychological distress and the Family Health International (FHI) 360 validated guide for bio-behavioral surveys (25) was adapted to collect information on socio-demographic characteristics, risky sexual behaviors, STIs, HIV prevention methods, HIV testing history, access to health care services, and HIV knowledge. The questionnaires were used across the three populations with slight adaptations depending on the population.

## Scores and operational definitions

The AUDIT was used to assess alcohol consumption. The AUDIT is a set of 10-item standardized screening instrument measuring self-reported alcohol use in the past 12 months, alcohol dependence symptoms, and alcohol-related problems to screen for excessive drinking. Each question of the AUDIT can obtain a score from zero (0) to four (4). A score  $\geq 8$  for men and  $\geq 7$  for women indicates hazardous/harmful drinking, while a score of 0 indicates a non-drinker; moderate alcohol use lies in-between (22,26,27). Binge drinking or heavy episodic drinking was defined as the consumption of six or more alcohol drinks on at least one occasion in the past 30 days (third item of the AUDIT) (22).

Tobacco use was assessed using six questions indicating participants’ smoking habits, frequency of smoking, history of smoking, type of products smoked and attempts at stopping to smoke (23).

The Kessler Psychological Distress Scale (K10) was used to measure psychological distress. This scale has been examined and validated among several populations and aims at measuring anxiety and depression with a 10-item questionnaire, each question pertaining to an emotional state and a five-level response scale for each response. The score obtained from the scale allows to categorize participants into four categories of psychological distress: severe (score  $\geq 30$ ), moderate (score: 25-29), mild (score: 20-24) and none (score  $< 20$ ) (28).

## Laboratory testing

Written informed consent was obtained prior to blood sample collection. Among the 2,115 key populations recruited for the study, 91.8% gave their written informed consent for blood sample collection. Blood samples were collected to test for HIV and Syphilis using SD Biolane Duo® (Abbott, Santa Clara, CA, USA). Each HIV positive test was confirmed with another HIV rapid test, the First

1  
2  
3 Response® HIV 1-2-O Card Test (Premier Medical Corporation Pvt. Ltd., Maharashtra, India). In case  
4 of discordant results, samples were tested with the INNO-LIA® HIV I/II Score (20T) (Fujirebio,  
5 Göteborg, Sweden) line immunoassay. All biological tests analyses were completed in the main HIV  
6 laboratory research unit, the Molecular Biology Laboratory (BIOLIM) at the University of Lomé.  
7  
8  
9

### 10 11 **Statistical analysis**

12 Descriptive statistics were performed and results were presented with frequency tabulations and  
13 percentages. Prevalences were estimated with their 95% confidence interval (95%CI). Univariate and  
14 multivariate logistic regression were performed to identify factors associated with: i) hazardous/harmful  
15 alcohol consumption, ii) binge drinking and iii) current tobacco consumption. For model building,  
16 characteristics that had a p-value <0.20 in univariate analysis were considered for the full multivariable  
17 models, which were then finalized using a stepwise, backward elimination approach. The three models  
18 did not include the variable “sex” as the four groups were already categorized according to sex. All  
19 analyses were performed using R® software.  
20  
21  
22  
23  
24  
25

### 26 27 **Ethical consideration**

28 This study was approved by the “Comité de Bioéthique pour la Recherche en Santé (CBRS)” (Bioethics  
29 Committee for Health Research) from the Togo Ministry of Health. Participants provided written  
30 consent prior to participation. Potential participants were told about the study purpose and procedures,  
31 potential risks and protections, and compensation. Informed consent was documented with signed  
32 consent forms.  
33  
34  
35  
36  
37

### 38 39 **Patient and Public Involvement**

40 Members of key populations were involved during the study design and data collection phases of the  
41 study. They were consulted prior to the study for their input on the best method to reach out to key  
42 populations and they were actively involved in the recruitment process.  
43  
44  
45

## 46 47 **Results**

### 48 49 **Socio-demographic characteristics**

50 A total of 641 MSM, 537 DU and 937 FSW, with a median age of 25 years, interquartile range (IQR)  
51 [21-32 years] participated in the study. The majority of the sample (n=1,443; 54.0%) had a secondary  
52 school education level and 76.7% were Christians (n=1,621). Approximately two-thirds of the sample  
53 (n=1,278; 60.4%) were likely to not have any psychological distress and 6.4% (n=136) were identified  
54 as having severe psychological distress, the highest among DU (n=68; 12.7 %). The HIV prevalence  
55 was 12.5% across the three populations, with the highest prevalence among MSM (20.4%). Study  
56 participants were informed of their blood test results by trained health professionals from HIV clinics.  
57  
58  
59  
60

Newly diagnosed HIV positive patients were referred to an HIV clinic for HIV treatment and care. Socio-demographic and health characteristics are summarized in Table 1.

### **Alcohol and tobacco consumption**

Alcohol and tobacco consumption patterns are presented in Table 2. Overall, the prevalence of alcohol consumption among the three groups was 64.8%. Most participants were identified as having a hazardous/harmful alcohol consumption (n=813; 38.4%), with the highest proportion among DU (62.4% among DU; 36.7% among FSW; and 20.9% among MSM;  $p < 0.001$ ). More than a quarter of FSW (n=275; 29.4%) were moderate drinkers. The MSM subgroup had the highest proportion of non-drinkers (n=338; 52.7%), followed by FSW (n=318; 33.9%). The overall prevalence of binge drinking was 45.5% and was the highest among DU (67.0%) (Table 2).

The prevalence of tobacco consumption was 30.6% among the three groups. DU had the highest proportion of smokers (80.8%). The highest proportion of non-smokers were FSW (n=821; 87.6%), followed by MSM (n=544, 84.9%). Of the people who smoked, 63.1% were smoking every day, including 79.0% of DU, 42.2% of FSW and 16.5% of MSM.

### **Factors associated with alcohol consumption**

Table 3 reports the results of the multivariable logistic regression model which describes the association between the independent variables and the hazardous/harmful consumption of alcohol and binge drinking. The odds of hazardous/harmful alcohol consumption were significantly higher among non-believers or other (aOR=0.7; 95% CI= [0.5-0.9];  $p = 0.001$ ) than among Muslims (aOR= 0.4; 95% CI [0.3-0.6];  $p = 0.001$ ) and Christians (aOR=0.7; 95% CI= [0.5-0.9];  $p = 0.001$ ). FSW (aOR=1.6; 95% CI= [1.3-2.1];  $p = 0.001$ ), and DU (aOR=2.0; 95% CI = [1.4-2.8];  $p = 0.001$ ) were more likely to engage in binge drinking compared to MSM. The place of residence, whether in the capital city of Lomé or in other towns, was also associated with hazardous/harmful alcohol consumption and binge drinking so that people living in other towns were almost three times more likely to have hazardous/harmful alcohol consumption (aOR=2.8; 95% CI= [2.2-3.4];  $p = 0.001$ ) or engage in binge drinking (aOR=2.5; 95% CI= [2.0-3.0];  $p = 0.001$ ) than those living in the capital city of Lomé. Psychological distress was also a risk factor for hazardous/harmful alcohol consumption and binge drinking. Participants with severe psychological distress were three times (aOR= 3.3, 95% CI= [2.2 – 5.1];  $p = 0.001$ ) and twice (aOR=2.2, 95% CI= [1.5 – 3.4];  $p = 0.001$ ) more likely to be engaged in hazardous/harmful alcohol consumption and binge drinking, respectively, than those with no psychological distress. The odds of hazardous/harmful alcohol consumption and binge drinking increased as the severity of psychological distress increased. In addition, being a DU was significantly associated with hazardous/harmful alcohol consumption and binge drinking. Compared to MSM and FSW, DU had two times the odds of hazardous/harmful alcohol consumption (aOR=2.4; 95%CI= [1.7-3.4];  $p = 0.001$ ) and two times the odds of binge drinking compared to MSM and FSW (aOR=2.0; 95%CI= [1.4 -2.8]). Finally, being 25 years



1  
2  
3 old and older (aOR=1.3; 95% CI [1.1-1.6]), tobacco use (aOR=2.6; 95% CI: [2.0-3.4]), being HIV  
4 positive (aOR=0.7; 95% CI [0.5-0.9]) were significantly associated with both hazardous/harmful alcohol  
5 consumption and binge drinking.  
6  
7

### 8 9 **Factors associated with tobacco use**

10  
11  
12 In multivariable analysis, living in cities other than Lomé (the capital city) (aOR=0.6; 95%CI 0.5-0.8),  
13 hazardous/harmful alcohol consumption (aOR=2.6; 95% CI 2.0-3.4), having mild (aOR=1.5; 95% CI  
14 1.1-2.1) or moderate (aOR=2.0; 95% CI 1.3-2.8) psychological distress, being a FSW (aOR=0.6; 95%  
15 0.4-0.9), and being a DU (aOR=17.9; 95% CI 12.4-26.4) were factors associated with tobacco use (Table  
16  
17 4) .  
18  
19  
20  
21  
22  
23  
24  
25  
26  
27  
28  
29  
30  
31  
32  
33  
34  
35  
36  
37  
38  
39  
40  
41  
42  
43  
44  
45  
46  
47  
48  
49  
50  
51  
52  
53  
54  
55  
56  
57  
58  
59  
60



## Discussion

The aim of this study was to assess the prevalence of hazardous/harmful, binge alcohol consumption as well as tobacco consumption, and explore correlates of heavy alcohol consumption and tobacco use in three key populations in Togo. We observed a high prevalence of hazardous/harmful alcohol consumption and binge drinking. Alcohol consumption was frequent among FSW and much more among DU. In addition, there was a dose-response effect relationship between alcohol consumption and psychological distress across all three populations. Tobacco use was highly prevalent among DU and among people who had a hazardous/harmful alcohol consumption.

Alcohol consumption is highly prevalent among key populations groups: more than half of the sample were categorized as moderate or hazardous drinkers. This has been corroborated in the literature among key population groups. In a recent study in Kenya, among 1,476 MSM, 44% of the sample had a hazardous alcohol consumption, and, no relationship was found between alcohol and tobacco consumption and HIV infection (29). In another study among 3,588 MSM in China, alcohol prevalence was 56.1% with 16.8% of them being binge drinkers and 14.4% being recent hazardous drinkers, using the WHO AUDIT-C scale (30). Recent alcohol misuse was associated with increased sexual and HIV/syphilis risks as well as sexual risk behaviors including alcohol use before sex, sex without condoms and multiple concurrent partnerships. A prospective cohort study among 1,027 FSW in Uganda found that 78% of the sample reported using alcohol with 71% admitting to using alcohol at least once a week, with a reduced prevalence of 54% after two years of intervention (31). This emphasizes the need for alcohol risk reduction programs and programs specifically focused on the adoption of safer drinking practices integrated into HIV prevention packages and geared towards highly exposed groups (30,31).

Alcohol and tobacco consumption are particularly relevant to people living with HIV (PLHIV). Studies have demonstrated a negative impact of alcohol, tobacco and drug use on life expectancy for HIV-positive patients (32). Alcohol and tobacco use have also been associated with poor adherence to antiretroviral therapy (ART) and the interaction between all those substances leading to a higher susceptibility to co-morbidities, opportunistic infections such as tuberculosis (TB) (33,34). In this study, hazardous/harmful alcohol consumption and binge drinking were both significantly associated with tobacco use (33). This indicates the need for targeted prevention actions such as smoking cessation treatment and alcohol reducing counseling, among key populations, particularly among key populations living with HIV. A systematic review of interventions to reduce alcohol use among MSM indicated that although interventions such as motivational interviewing appear to be effective among MSM, they are scarce (35).

Psychological distress was found to have a dose-response relationship with alcohol consumption. Severe psychological distress was at least twice higher among people with a hazardous/harmful alcohol

1  
2  
3 consumption and people who were binge drinking. This is consistent with other studies that found a  
4 relationship between alcohol and drug abuse and psychological symptoms such as depression, anxiety  
5 and suicidal ideation among key populations (29,36,37). Consistent with our findings, a study conducted  
6 in Cambodia among MSM found that 38.8% had severe psychological distress and that severe  
7 psychological distress was associated with alcohol and drug use, poor self-reported quality of life and  
8 reduced condom use at last sex (36). In southern India, a study among FSW found a significant  
9 relationship between major depression and alcohol use (38). Another study among PLHIV in Uganda  
10 found that psychological distress was significantly associated with non-adherence to ART (39). This has  
11 implication for HIV prevention and further demonstrates the need for integrated services of mental  
12 health interventions, psychological support as well as substance abuse reduction program into HIV  
13 prevention programs. In fact, in Togo, the current policy on HIV prevention and care ensures access to  
14 HIV prevention and treatment services with the integration of Sexual and Reproductive Services and  
15 HIV care services for all citizens including key populations, but mental health interventions are not yet  
16 a component of the basic health services package. This would also imply that health care workers be  
17 sufficiently armed through sufficient and adequate training to screen and refer key populations in need  
18 of those interventions.  
19

20  
21  
22 Very few studies have explored alcohol and tobacco consumption patterns among the three main key  
23 populations. This study found quite different patterns of consumption among the three groups, with  
24 MSM in this sample being the lowest at-risk group for hazardous/harmful alcohol consumption, binge  
25 drinking and tobacco use. DU on the other hand, appear to be most vulnerable to hazardous/harmful  
26 alcohol consumption, binge drinking and tobacco use, as well as the group with the highest prevalence  
27 of severe psychological distress. This could potentially indicate that there is a difference in coping  
28 strategies for key populations and that, behavioral interventions specifically geared towards MSM have  
29 elements that perhaps have successfully enhanced their capacity to cope with the stress among the most  
30 marginalized groups. For example, studies have demonstrated the effectiveness of community-based  
31 organizations (CBOs), peer-led interventions and community engagement in HIV prevention among  
32 MSM (40–42). It is important that targeted interventions be geared toward generating an interest for  
33 community building among DU.  
34

35  
36  
37 Strengths of this study include the large sample size of the three main types of key populations. In  
38 addition, to our knowledge, this is the first study in Togo comparing alcohol and tobacco consumption  
39 in these key populations using standardized tools (AUDIT, Tobacco Questions for Surveys, and Kessler  
40 psychological distress scale). Finally, this study was completed in the eight main cities of Togo and used  
41 geographical mapping as well as RDS sampling, which could indicate that the findings of this study to  
42 reflect the national prevalence of alcohol and tobacco consumption among key populations.  
43  
44  
45  
46  
47  
48  
49  
50  
51  
52  
53  
54  
55  
56  
57  
58  
59  
60

1  
2  
3 However, there were few limitations including the fact that some variables such as childhood abuse,  
4 stigma, or recent trauma which could influence alcohol and tobacco consumption, have not been  
5 collected. Interactions between the different groups of key populations (i.e., DUs engaging in sex work,  
6 MSM who engage in sex work, sex workers who are also MSM) were also not collected. Furthermore,  
7 self-reported data used in this study, are prone to social desirability and recall bias. Despite these  
8 limitations, the results presented in this study make a unique contribution to the literature on alcohol and  
9 tobacco use among key populations in West Africa, especially since Togo shares similar characteristics  
10 with other countries of West Africa regarding the HIV epidemic (concentrated HIV epidemics with  
11 elevated HIV prevalences among key populations), access to treatment and prevention for key  
12 populations (3,43). The results could be generalized to other countries in West Africa.  
13  
14  
15  
16  
17  
18

19 Further research could further explore the relationship between alcohol, tobacco, depression and sexual  
20 risk behaviors and HIV infection among key populations. Qualitative studies could also explore the  
21 reasons for high alcohol and tobacco consumption among key populations.  
22  
23  
24

### 25 **Conclusion**

26  
27 Alcohol and tobacco use and abuse are highly prevalent among key populations. Psychological distress  
28 and being a DU were both significantly associated with alcohol and tobacco consumption. There is a  
29 need for mental health and substance abuse screening, referral and treatment to be addressed and fully  
30 integrated into HIV prevention services for key populations. Further research is also needed to explore,  
31 through qualitative and quantitative designs, the consequences and impact of alcohol and tobacco  
32 consumption, as well as mental health issues such as psychological distress on individuals and its  
33 contribution to the HIV epidemic.  
34  
35  
36  
37  
38  
39  
40  
41  
42  
43  
44  
45  
46  
47  
48  
49  
50  
51  
52  
53  
54  
55  
56  
57  
58  
59  
60

**Author contributorship**

ABA and FGK contributed equally to this paper. ABA, FGK, PAC and DKE conceived and designed the study with inputs from AJ. PJ, EKS, CAD, MS and TJB facilitated data collection and contributed to analysis of the data. ABA and FGK analyzed, interpreted the data and drafted the manuscript. PAC, AJ and DKE revised the manuscript for important intellectual content. All authors participated in the revision process and have approved the final version of the manuscript.

**Competing interests**

No competing interests to declare

**Funding**

This work was supported by the « Centre Africain de Recherche en Epidémiologie et en Santé Publique (CARESP) » (African Center for Epidemiology and Public Health Research) and the Togo National HIV/AIDS and STI Control Program.

**Data sharing statement**

No additional data are available

**Ethics approval and consent to participate**

This study was reviewed and approved by the Bioethics Committee for Research in Health in Togo (CBRS No. 18/2017/CBRS of June 22 2017). Consent was obtained from each participant prior to administering the survey questions.

## References

1. Kharsany ABM, Karim QA. HIV Infection and AIDS in Sub-Saharan Africa: Current Status, Challenges and Opportunities. *Open AIDS J*. 2016 Apr 8;10:34–48.
2. Djomand G, Quaye S, Sullivan PS. HIV epidemic among key populations in west Africa. *Curr Opin HIV AIDS*. 2014 Sep;9(5):506–13.
3. HIV and AIDS in West and Central Africa Overview [Internet]. AVERT. 2017 [cited 2018 Jul 19]. Available from: <https://www.avert.org/hiv-and-aids-west-and-central-africa-overview>
4. Joint United Nations Programme on HIV/AIDS (UNAIDS). Togo [Internet]. [cited 2018 Jul 19]. Available from: <http://www.unaids.org/en/regionscountries/countries/togo>
5. World Health Organization (WHO). Global status report on alcohol and health, 2018 [Internet]. 2018 [cited 2018 Oct 10]. Available from: [http://www.who.int/substance\\_abuse/publications/global\\_alcohol\\_report/gsr\\_2018/en/](http://www.who.int/substance_abuse/publications/global_alcohol_report/gsr_2018/en/)
6. Lama TP, Kumoji E 'Kuor, Ketlogetswe D, Anderson M, Brahmabhatt H. Alcohol Consumption and Risky Sexual Behavior Among Persons Attending Alcohol Consumption Venues in Gaborone, Botswana. *Prev Sci Off J Soc Prev Res*. 2016 Feb;17(2):227–36.
7. Sileo KM, Kintu M, Chanes-Mora P, Kiene SM. “Such Behaviors Are Not in My Home Village, I Got Them Here”: A Qualitative Study of the Influence of Contextual Factors on Alcohol and HIV Risk Behaviors in a Fishing Community on Lake Victoria, Uganda. *AIDS Behav*. 2016 Mar;20(3):537–47.
8. Chersich MF, Rees HV. Causal links between binge drinking patterns, unsafe sex and HIV in South Africa: its time to intervene. *Int J STD AIDS*. 2010 Jan;21(1):2–7.
9. Chen Y, Li X, Shen Z, Zhou Y, Tang Z. Drinking reasons and alcohol problems by work venue among female sex workers in Guangxi, China. *Subst Use Misuse*. 2015 Apr;50(5):642–52.
10. Heravian A, Solomon R, Krishnan G, Vasudevan CK, Krishnan AK, Osmand T, et al. Alcohol consumption patterns and sexual risk behavior among female sex workers in two South Indian communities. *Int J Drug Policy*. 2012 Nov;23(6):498–504.
11. Tobacco [Internet]. World Health Organization. [cited 2018 Aug 3]. Available from: <http://www.who.int/news-room/fact-sheets/detail/tobacco>
12. Commar A, Prasad VK, Tursan d’Espaignet E, Wolfenden L, Weltgesundheitsorganisation. WHO global report on trends in prevalence of tobacco smoking 2000-2025. 2018.
13. World Health Organization. WHO global report on trends in prevalence of tobacco smoking, 2015. [Internet]. 2015 [cited 2018 Aug 2]. Available from: [http://apps.who.int/iris/bitstream/10665/156262/1/9789241564922\\_eng.pdf](http://apps.who.int/iris/bitstream/10665/156262/1/9789241564922_eng.pdf)
14. Reynolds NR. Cigarette smoking and HIV: More evidence for action. *AIDS Educ Prev Off Publ Int Soc AIDS Educ*. 2009 Jun;21(3 Suppl):106–21.
15. Agoudavi K, Ministère de la Santé, Togo. Rapport Final de l’enquête STEPS Togo 2010 [Internet]. Ministère de la Santé Togo; 2012. Available from: [http://www.who.int/ncds/surveillance/steps/2010STEPS\\_Report\\_Togo\\_FR.pdf](http://www.who.int/ncds/surveillance/steps/2010STEPS_Report_Togo_FR.pdf)
16. Conseil National de Lutte contre le sida et les infections sexuellement transmissibles, République du Togo. Estimation de la taille et cartographie des sites des hommes ayant des

- 1  
2  
3 rapports sexuels avec d'autres hommes et des Professionnelles de sexe [Internet]. Republique du  
4 Togo; 2015. Available from: [http://cnlstogo.org/download/cartographies/Rapport-Estimation-de-](http://cnlstogo.org/download/cartographies/Rapport-Estimation-de-la-taille-et-cartographie-HSH-et-PS-Togo_30_06_15-OK.pdf)  
5 [la-taille-et-cartographie-HSH-et-PS-Togo\\_30\\_06\\_15-OK.pdf](http://cnlstogo.org/download/cartographies/Rapport-Estimation-de-la-taille-et-cartographie-HSH-et-PS-Togo_30_06_15-OK.pdf)  
6
- 7 17. Malekinejad M, Johnston L, Kendall C, Kerr L, Rifkin M, Rutherford G. Using respondent-  
8 driven sampling methodology for HIV biological and behavioral surveillance in international  
9 settings: a systematic review. *AIDS Behav.* 2008;12(4 Suppl):S105-30.  
10
- 11 18. Heckathorn D. Respondent-drive sampling: A new approach to the study of hidden populations.  
12 *Soc Probl.* 1997;44(2):174-99.  
13
- 14 19. Cáceres CF, Aggleton P, Galea JT. Sexual diversity, social inclusion and HIV/AIDS. *AIDS*  
15 *Lond Engl.* 2008 Aug;22(Suppl 2):S45-55.  
16
- 17 20. Ross MW, Kajubi P, Mandel JS, McFarland W, Raymond HF. Internalized  
18 homonegativity/homophobia is associated with HIV-risk behaviours among Ugandan gay and  
19 bisexual men. *Int J STD AIDS.* 2013 May;24(5):409-13.  
20
- 21 21. Jaquet A, Nouaman M, Tine J, Tanon A, Anoma C, Inwoley A, et al. Hepatitis B treatment  
22 eligibility in West Africa: uncertainties and need for prospective cohort studies. *Liver Int Off J*  
23 *Int Assoc Study Liver.* 2017 Aug;37(8):1116.  
24
- 25 22. Babor TF, Higgins-Biddle JC, Saunders JB, Monteiro MG. The Alcohol Use Disorders  
26 Identification Test: Guidelines for Use in Primary Care [Internet]. World Health Organization  
27 (WHO); p. 41. Available from:  
28 [http://apps.who.int/iris/bitstream/handle/10665/67205/WHO\\_MSD\\_MSB\\_01.6a.pdf;jsessionid=](http://apps.who.int/iris/bitstream/handle/10665/67205/WHO_MSD_MSB_01.6a.pdf;jsessionid=3743A977A779D807D1894679A3E91DD3?sequence=1)  
29 [3743A977A779D807D1894679A3E91DD3?sequence=1](http://apps.who.int/iris/bitstream/handle/10665/67205/WHO_MSD_MSB_01.6a.pdf;jsessionid=3743A977A779D807D1894679A3E91DD3?sequence=1)  
30  
31
- 32 23. Global Adult Tobacco Survey Collaborative Group, Centers for Disease Control and Prevention  
33 (CDC). Tobacco Questions for Surveys: A subset of key questions for the Global Adult Tobacco  
34 Survey (GATS) [Internet]. Atlanta, Georgia: Centers for Disease Control and Prevention; 2011.  
35 Available from: [http://www.who.int/tobacco/surveillance/en\\_tfi\\_tqs.pdf](http://www.who.int/tobacco/surveillance/en_tfi_tqs.pdf)  
36
- 37 24. Kessler RC, Andrews G, Colpe LJ, Hiripi E, Mroczek DK, Normand SLT, et al. Short screening  
38 scales to monitor population prevalences and trends in non-specific psychological distress.  
39 *Psychol Med.* 2002 Aug;32(6):959-76.  
40
- 41 25. Amon J, Brown T, Hogle J, MacNeil J, Magnani R, Mills S, et al. Guidelines for repeated  
42 behavioral surveys in populations at risk of HIV. :358.  
43
- 44 26. Foxcroft DR, Smith LA, Thomas H, Howcutt S. Accuracy of Alcohol Use Disorders  
45 Identification Test for detecting problem drinking in 18-35 year-olds in England: method  
46 comparison study. *Alcohol Alcohol Oxf Oxf.* 2015 Mar;50(2):244-50.  
47
- 48 27. Gache P, Michaud P, Landry U, Accietto C, Arfaoui S, Wenger O, et al. The Alcohol Use  
49 Disorders Identification Test (AUDIT) as a screening tool for excessive drinking in primary  
50 care: reliability and validity of a French version. *Alcohol Clin Exp Res.* 2005 Nov;29(11):2001-  
51 7.  
52
- 53 28. Andrews G, Slade T. Interpreting scores on the Kessler Psychological Distress Scale (K10). *Aust*  
54 *N Z J Public Health.* 2001 Dec;25(6):494-7.  
55
- 56 29. Korhonen C, Kimani M, Wahome E, Otieno F, Okall D, Bailey RC, et al. Depressive symptoms  
57 and problematic alcohol and other substance use in 1476 gay, bisexual, and other MSM at three  
58 research sites in Kenya. *AIDS Lond Engl.* 2018 Jul 17;32(11):1507-15.  
59  
60



- 1
- 2
- 3 30. Liu Y, Ruan Y, Strauss SM, Yin L, Liu H, Amico KR, et al. Alcohol misuse, risky sexual
- 4 behaviors, and HIV or syphilis infections among Chinese men who have sex with men. *Drug*
- 5 *Alcohol Depend.* 2016 Nov 1;168:239–46.
- 6
- 7 31. Weiss HA, Vandepitte J, Bukonya JN, Mayanja Y, Nakubulwa S, Kamali A, et al. High Levels
- 8 of Persistent Problem Drinking in Women at High Risk for HIV in Kampala, Uganda: A
- 9 Prospective Cohort Study. *Int J Environ Res Public Health* [Internet]. 2016 Feb [cited 2018 Sep
- 10 20];13(2). Available from: <https://www.ncbi.nlm.nih.gov/pmc/articles/PMC4772173/>
- 11
- 12 32. Petoumenos K, Law MG. Smoking, alcohol and illicit drug use effects on survival in HIV-
- 13 positive persons. *Curr Opin HIV AIDS.* 2016;11(5):514–20.
- 14
- 15 33. Jaquet A, Ekouevi D-K, Aboubakrine M, Bashi J, Messou E, Maiga M, et al. Tobacco use and its
- 16 determinants in HIV-infected patients on antiretroviral therapy in West African countries. *Int J*
- 17 *Tuberc Lung Dis.* 2009 Nov;13(11):1433–9.
- 18
- 19 34. Schneider M, Chersich M, Temmerman M, Degomme O, Parry CD. The impact of alcohol on
- 20 HIV prevention and treatment for South Africans in primary healthcare. *Curationis.* 2014 Aug
- 21 1;37(1):1137.
- 22
- 23 35. Wray TB, Grin B, Dorfman L, Glynn TR, Kahler C. Systematic Review of Interventions to
- 24 Reduce Problematic Alcohol Use in Men who have Sex with Men. *Drug Alcohol Rev.*
- 25 2016;35(2):148–57.
- 26
- 27 36. Yi S, Tuot S, Chhoun P, Pal K, Choub SC, Mburu G. Mental health among men who have sex
- 28 with men in Cambodia: Implications for integration of mental health services within HIV
- 29 programmes. *Int J Equity Health.* 2016 Mar 24;15:53.
- 30
- 31 37. Stoloff K, Joska JA, Feast D, De Swardt G, Hugo J, Struthers H, et al. A description of common
- 32 mental disorders in men who have sex with men (MSM) referred for assessment and intervention
- 33 at an MSM clinic in Cape Town, South Africa. *AIDS Behav.* 2013 May;17 Suppl 1:S77-81.
- 34
- 35 38. Patel S, Saggurti N, Pachauri S, Prabhakar P. Correlates of Mental Depression Among Female
- 36 Sex Workers in Southern India. *Asia Pac J Public Health.* 2015;27(8):809–19.
- 37
- 38 39. Nakimuli-Mpungu E, Mutamba B, Othengo M, Musisi S. Psychological distress and adherence
- 39 to highly active anti-retroviral therapy (HAART) in Uganda: A pilot study. *Afr Health Sci.* 2009
- 40 Aug 1;9(Suppl 1):S2–7.
- 41
- 42 40. Ye S, et al. Efficacy of peer-led interventions to reduce unprotected anal intercourse among men
- 43 who have sex with men: a meta-analysis. - PubMed - NCBI. *PLOS ONE* [Internet]. 2014 [cited
- 44 2018 Nov 5];9(3). Available from: <https://www.ncbi.nlm.nih.gov/pubmed/24614809>
- 45
- 46 41. Shangani S, et al. Effectiveness of peer-led interventions to increase HIV testing among men
- 47 who have sex with men: a systematic review and meta-analysis. - PubMed - NCBI. *AIDS Care*
- 48 [Internet]. 2017 [cited 2018 Nov 5];29(8). Available from:
- 49 <https://www.ncbi.nlm.nih.gov/pubmed/28150501>
- 50
- 51 42. Chuang D, Lacombe-Duncan A. Community engagement among men who have sex with men
- 52 living with HIV/AIDS in Taiwan. - PubMed - NCBI. *AIDS Care* [Internet]. 2016 [cited 2018
- 53 Nov 5];28(4). Available from: <https://www.ncbi.nlm.nih.gov/pubmed/26586156>
- 54
- 55 43. Joint United Nations Programme on HIV/AIDS (UNAIDS). The Western and Central Africa
- 56 Catch-up plan: Putting HIV treatment on the fast-track by 2018 [Internet]. 2017. Available from:
- 57 [https://www.unaids.org/sites/default/files/media\\_asset/WCA-catch-up-plan\\_en.pdf](https://www.unaids.org/sites/default/files/media_asset/WCA-catch-up-plan_en.pdf)
- 58
- 59
- 60

1  
2  
3  
4  
5  
6  
7  
8  
9  
10  
11  
12  
13  
14  
15  
16  
17  
18  
19  
20  
21  
22  
23  
24  
25  
26  
27  
28  
29  
30  
31  
32  
33  
34  
35  
36  
37  
38  
39  
40  
41  
42  
43  
44  
45  
46  
47  
48  
49  
50  
51  
52  
53  
54  
55  
56  
57  
58  
59  
60

For peer review only



**Table 1:** Socio-demographic and health characteristics

|                                           | <b>MSM (n=641)</b><br><b>n (%)</b> | <b>FSW (n=937)</b><br><b>n (%)</b> | <b>DU (n=537)</b><br><b>n (%)</b> | <b>Total (=2115)</b><br><b>n (%)</b> | <b>p-value</b> |
|-------------------------------------------|------------------------------------|------------------------------------|-----------------------------------|--------------------------------------|----------------|
| <b>Age (years)</b>                        |                                    |                                    |                                   |                                      | <0.001         |
| 18 – 25                                   | 442 (68.9)                         | 456 (48.7)                         | 183 (34.1)                        | 1081 (51.1)                          |                |
| > 25                                      | 199 (31.1)                         | 481 (51.3)                         | 354 (65.9)                        | 1034 (48.9)                          |                |
| <b>Sex</b>                                |                                    |                                    |                                   |                                      | <0.001         |
| Male                                      | 641 (100.0)                        | 0 (0.0)                            | 510 (95.0)                        | 1151 (54.4)                          |                |
| Female                                    | 0 (0.0)                            | 937 (100.0)                        | 27 (5.0)                          | 964 (45.6)                           |                |
| <b>Marital status</b>                     |                                    |                                    |                                   |                                      | <0.001         |
| Married                                   | 41 (6.4)                           | 130 (13.9)                         | 185 (34.5)                        | 356 (16.8)                           |                |
| Not married                               | 600 (93.6)                         | 807 (86.1)                         | 352 (65.5)                        | 1759 (83.2)                          |                |
| <b>Education level</b>                    |                                    |                                    |                                   |                                      | <0.001         |
| Never went to school                      | 1 (0.2)                            | 158 (16.8)                         | 29 (5.4)                          | 188 (8.9)                            |                |
| Primary school                            | 51 (7.9)                           | 263 (28.1)                         | 163 (30.4)                        | 477 (22.6)                           |                |
| Secondary school                          | 356 (55.5)                         | 471 (50.3)                         | 316 (58.8)                        | 1143 (54.0)                          |                |
| College/University                        | 233 (36.4)                         | 45 (4.8)                           | 29 (5.4)                          | 307 (14.5)                           |                |
| <b>Religion</b>                           |                                    |                                    |                                   |                                      | <0.001         |
| Other/ Non-believers                      | 65 (10.1)                          | 100 (10.7)                         | 98 (18.2)                         | 263 (12.4)                           |                |
| Christians                                | 522 (81.5)                         | 743 (79.3)                         | 356 (66.3)                        | 1621 (76.7)                          |                |
| Muslims                                   | 54 (8.4)                           | 94 (10.0)                          | 83 (15.5)                         | 231 (10.9)                           |                |
| <b>Place of residence</b>                 |                                    |                                    |                                   |                                      | <0.001         |
| Lomé                                      | 447 (69.7)                         | 526 (5.1)                          | 316 (58.8)                        | 1289 (60.9)                          |                |
| Other                                     | 194 (30.3)                         | 411 (43.9)                         | 221 (41.2)                        | 826 (39.1)                           |                |
| <b>Psychological distress</b>             |                                    |                                    |                                   |                                      | <0.001         |
| Likely not to have psychological distress | 497 (77.5)                         | 538 (57.4)                         | 243 (45.2)                        | 1278 (60.4)                          |                |

|                                                |            |            |            |             |        |
|------------------------------------------------|------------|------------|------------|-------------|--------|
| Likely to have mild psychological distress     | 80 (12.5)  | 223 (23.8) | 123 (22.9) | 426 (20.1)  |        |
| Likely to have moderate psychological distress | 55 (8.6)   | 117 (12.5) | 103 (19.2) | 275 (13.0)  |        |
| Likely to have severe psychological distress   | 9 (1.4)    | 59 (6.3)   | 68 (12.7)  | 136 (6.5)   |        |
| <b>HIV Infection</b>                           |            |            |            |             | <0.001 |
| Yes                                            | 131 (20.4) | 119 (12.7) | 15 (2.8)   | 265 (12.5)  |        |
| No                                             | 480 (74.9) | 787 (84.0) | 410 (76.3) | 1677 (79.3) |        |
| Not tested                                     | 30 (4.7)   | 31 (3.3)   | 112 (20.9) | 173 (8.2)   |        |

For peer review only

1  
2  
3  
4  
5  
6  
7  
8  
9  
10  
11  
12  
13  
14  
15  
16  
17  
18  
19  
20  
21  
22  
23  
24  
25  
26  
27  
28  
29  
30  
31  
32  
33  
34  
35  
36  
37  
38  
39  
40  
41  
42  
43  
44  
45  
46

**Table 2:** Alcohol and Tobacco consumption patterns among key populations in Togo in 2017

| <b>Addictive behaviour</b>                         | <b>MSM (n= 641)</b> | <b>FSW(n=937)</b> | <b>DU (n=537)</b> | <b>Total (N=2115)</b> | <b>p-value</b> |
|----------------------------------------------------|---------------------|-------------------|-------------------|-----------------------|----------------|
|                                                    | <b>n (%)</b>        | <b>n (%)</b>      | <b>n (%)</b>      | <b>N (%)</b>          |                |
| <b>Alcohol consumption</b>                         |                     |                   |                   |                       | <0.001         |
| Non-drinker                                        | <b>338 (52.7)</b>   | <b>318 (33.9)</b> | <b>88 (16.4)</b>  | <b>744 (35.2)</b>     |                |
| Moderate drinking <sup>1</sup>                     | <b>169 (26.4)</b>   | <b>275 (29.4)</b> | <b>114 (21.2)</b> | <b>558 (26.4)</b>     |                |
| Hazardous consumption                              | <b>134 (20.9)</b>   | <b>344 (36.7)</b> | <b>335 (62.4)</b> | <b>813 (38.4)</b>     |                |
| <b>Binge drinking<sup>2</sup> (overall)</b>        | <b>196 (30.6)</b>   | <b>406 (43.3)</b> | <b>360 (67.0)</b> | <b>962 (45.5)</b>     |                |
| <b>Binge drinking<sup>2</sup> (among drinkers)</b> | <b>196 (64.7)</b>   | <b>406 (65.6)</b> | <b>360 (80.2)</b> | <b>962 (70.2)</b>     |                |
| <b>Tobacco Use</b>                                 |                     |                   |                   |                       | <0.001         |
| Yes                                                | <b>97 (15.1)</b>    | <b>116 (12.4)</b> | <b>434 (80.8)</b> | <b>647 (30.6)</b>     |                |
| <i>Everyday</i>                                    | <b>16 (16.5)</b>    | <b>49 (42.2)</b>  | <b>343 (79.0)</b> | <b>408 (63.1)</b>     |                |
| No                                                 | <b>544 (84.9)</b>   | <b>821 (87.6)</b> | <b>103 (19.2)</b> | <b>1468 (69.4)</b>    |                |

FSW: female sex worker; MSM: Men who have sex with men; DU: Drug user

<sup>1</sup>: Moderate drinking levels depend on sex (differences in metabolism for females and males); AUDIT score: 1-6 for females and AUDIT score: 1- 7 for males

<sup>2</sup>: Binge drinking is defined as the consumption of six or more alcohol drinks at least once per month in one occasion (Question 3 of the AUDIT)

1  
2  
3  
4  
5  
6  
7  
8  
9  
10  
11  
12  
13  
14  
15  
16  
17  
18  
19  
20  
21  
22  
23  
24  
25  
26  
27  
28  
29  
30  
31  
32  
33  
34  
35  
36  
37  
38  
39  
40  
41  
42  
43  
44  
45  
46

**Table 3:** Factors associated with hazardous alcohol consumption and binge drinking among key populations in Togo in 2017

|                        | Hazardous/harmful alcohol consumption |                |         |                       |              | Binge drinking      |               |              |                       |              |
|------------------------|---------------------------------------|----------------|---------|-----------------------|--------------|---------------------|---------------|--------------|-----------------------|--------------|
|                        | Univariate analysis                   |                |         | Multivariate analysis |              | Univariate analysis |               |              | Multivariate analysis |              |
|                        | n/N                                   | OR (95% CI)    | p-value | aOR (95% CI)          | p-value      | n/N                 | OR (95% CI)   | p-value      | aOR (95% CI)          | p-value      |
| <b>Age (years)</b>     |                                       |                |         |                       | <b>0.05</b>  |                     |               |              |                       | <b>0.05</b>  |
| 18 – 25                | 351/1081                              | 1              |         | 1                     |              | 433/1081            | 1             |              | 1                     |              |
| >25                    | 462/1034                              | 1.7 (1.4-2.0)  | 0.001   | 1.3 (1.1-1.6)         | 0.05         | 529/1034            | 1.6 (1.3-1.9) | 0.001        | 1.3 (1.1-1.6)         | 0.01         |
| <b>Marital status</b>  |                                       |                |         |                       | 0.97         |                     |               |              |                       |              |
| Not married            | 641/1759                              | 1              |         | 1                     |              | 777/1759            | 1             |              |                       |              |
| Married                | 172/356                               | 1.6 (1.302-1)  | 0.001   | 1.0 (0.8-1.3)         |              | 185/356             | 1.4 (1.1-1.7) | 0.001        |                       |              |
| <b>Education level</b> |                                       |                | 0.001   |                       | 0.19         |                     |               | <b>0.001</b> |                       | <b>0.01</b>  |
| Never been to school   | 64/188                                | 1              |         | 1                     |              | 69/188              | 1             |              | 1                     |              |
| Primary school         | 232/477                               | 1.8 (1.3-2.6)  | 0.001   | 1.50 (1.0-2.2)        | 0.05         | 256/477             | 2.0 (1.4-2.8) | 0.001        | 1.6 (1.1-2.4)         | 0.01         |
| Secondary school       | 436/1143                              | 1.2 (0.9-1.7)  | 0.283   | 1.3 (0.9-1.8)         | 0.26         | 517/1143            | 1.4 (1.0-2.0) | 0.05         | 1.5 (1.0-2.1)         | 0.05         |
| University             | 81/307                                | 0.7 (0.5- 1.0) | 0.10    | 1.3 (0.8-2.2)         | 0.21         | 120/307             | 1.1 (0.8-1.6) | 0.60         | 2.1 (1.3-3.3)         | 0.01         |
| <b>Religion</b>        |                                       |                | 0.001   |                       | <b>0.001</b> |                     |               | <b>0.001</b> |                       | <b>0.001</b> |
| Others/ Non-believers  | 56/112                                | 1              |         | 1                     |              | 151/263             | 1             |              | 1                     |              |

|                                                |          |               |       |               |              |          |               |              |                |              |
|------------------------------------------------|----------|---------------|-------|---------------|--------------|----------|---------------|--------------|----------------|--------------|
| Christians                                     | 596/1621 | 0.5 (0.4-0.7) | 0.001 | 0.7 (0.5-0.9) | 0.05         | 718/1621 | 0.6 (0.5-0.8) | 0.001        | 0.71 (0.5-1.0) | 0.05         |
| Muslims                                        | 80/231   | 0.5 (0.3-0.7) | 0.001 | 0.4 (0.3-0.6) | 0.001        | 93/231   | 0.5 (0.4-0.7) | 0.001        | 0.4 (0.3-0.7)  | 0.001        |
| <b>Place of residence</b>                      |          |               |       |               | <b>0.001</b> |          |               |              |                | <b>0.001</b> |
| Lomé                                           | 392/1289 | 1             |       | 1             |              | 486/1289 | 1             |              | 1              |              |
| Others                                         | 421/826  | 2.4 (2.0-2.9) | 0.001 | 2.8 (2.2-3.4) | 0.001        | 476/826  | 2.3 (1.9-2.7) | 0.001        | 2.5 (2.0-3.0)  | 0.001        |
| <b>Tobacco use</b>                             |          |               |       |               | <b>0.001</b> |          |               |              |                | <b>0.001</b> |
| No                                             | 423/1468 | 1             |       | 1             |              | 533/1468 | 1             |              | 1              |              |
| Yes                                            | 390/647  | 3.8 (3.1-4.6) | 0.001 | 2.6 (2.0-3.4) | 0.001        | 429/647  | 3.5 (2.8-4.2) | 0.001        | 2.6 (2.0-3.4)  | 0.001        |
| <b>Psychological distress</b>                  |          |               | 0.001 |               | <b>0.001</b> |          |               | <b>0.001</b> |                | <b>0.001</b> |
| Likely to not have psychological distress      | 387/1278 | 1             |       | 1             |              | 491/1278 | 1             |              | 1              |              |
| Likely to have mild psychological distress     | 174/426  | 1.6 (1.3-2.0) | 0.001 | 1.2 (0.9-1.5) | 0.20         | 220/426  | 1.7 (1.4-2.1) | 0.001        | 1.4 (1.1-1.7)  | 0.05         |
| Likely to have moderate psychological distress | 159/275  | 3.2 (2.4-4.1) | 0.001 | 2.5 (1.9-3.4) | 0.001        | 160/275  | 2.2 (1.7-2.9) | 0.001        | 1.8 (1.3-2.4)  | 0.001        |
| Likely to have severe psychological distress   | 93/136   | 5.0 (3.4-7.4) | 0.001 | 3.3 (2.2-5.1) | 0.001        | 91/136   | 3.2 (2.2-4.8) | 0.001        | 2.2 (1.5-3.4)  | 0.001        |
| <b>HIV infection</b>                           |          |               | 0.001 |               | <b>0.05</b>  |          |               | <b>0.001</b> |                | <b>0.05</b>  |
| No                                             | 665/1677 | 1             |       | 1             |              | 784/1677 | 1             |              | 1              |              |
| Yes                                            | 67/265   | 0.5 (0.4-0.7) | 0.001 | 0.7 (0.5-1.0) | 0.05         | 84/265   | 0.5 (0.4-0.7) | 0.001        | 0.7 (0.5-1.0)  | 0.05         |
| Not completed                                  | 81/173   | 1.3 (1.0-1.8) | 0.10  | 1.2 (0.8-1.8) | 0.30         | 94/173   | 1.4 (1.0-1.9) | 0.10         | 1.2 (0.9-1.8)  | 0.26         |
| <b>Key population</b>                          |          |               | 0.001 |               | <b>0.001</b> |          |               | <b>0.001</b> |                | <b>0.001</b> |
| MSM                                            | 134/641  | 1             |       | 1             |              | 196/641  | 1             |              | 1              |              |
| FSW                                            | 344/937  | 2.2 (1.7-2.8) | 0.001 | 1.8 (1.4-2.4) | 0.001        | 406/937  | 1.7 (1.4-2.2) | 0.001        | 1.6 (1.3-2.1)  | 0.001        |
| DU                                             | 335/537  | 6.3 (4.9-8.2) | 0.001 | 2.4 (1.7-3.4) | 0.01         | 20/27    | 4.6 (3.6-5.9) | 0.001        | 2.0 (1.4-2.8)  | 0.001        |

aOR: adjusted odds ratio; OR: odds ratio; 95%CI: 95% confidence interval; DU: drug user; FSW: female sex worker; MSM: men who have sex with men

**Table 4.** Factors associated with tobacco use among key populations in Togo in 2017

|                                           | Univariate analysis |                |         | Multivariate analysis |              |
|-------------------------------------------|---------------------|----------------|---------|-----------------------|--------------|
|                                           | n/N                 | OR (95% CI)    | p-value | aOR (95% CI)          | p-value      |
| <b>Age (years)</b>                        |                     |                |         |                       | 0.14         |
| 18 – 25                                   | 280/1081            | 1              |         | 1                     |              |
| >25                                       | 367/1034            | 1.6 (1.3 -1.9) | 0.001   | 0.81 (0.6-1.1)        | 0.15         |
| <b>Marital status</b>                     |                     |                |         |                       | 0.22         |
| Not married                               | 481/1759            | 1              |         | 1                     |              |
| Married                                   | 356                 | 2.3 (1.8-2.9)  | 0.001   | 0.8 (0.6-1.1)         | 0.22         |
| <b>Level of education</b>                 |                     |                | 0.001   |                       | 0.32         |
| None                                      | 42/188              | 1              |         | 1                     |              |
| Primary school                            | 186/477             | 2.2 (1.5-3.3)  | 0.001   | 1.3 (0.8-2.3)         | 0.26         |
| Secondary/high school                     | 364/1143            | 1.6 (1.1-2.4)  | 0.01    | 1.2 (0.7-1.9)         | 0.59         |
| University                                | 55/307              | 0.8 (0.5-1.2)  | 0.230   | 0.9 (0.5-1.7)         | 0.73         |
| <b>Religion</b>                           |                     |                | 0.001   |                       | <b>0.05</b>  |
| Others/ Non-believers                     | 40/112              | 1              |         | 1                     |              |
| Christians                                | 436/1621            | 0.5 (0.4-0.6)  | 0.001   | 0.7 (0.5-1.0)         | 0.10         |
| Muslims                                   | 96/231              | 0.9 (0.6-1.3)  | 0.63    | 1.1 (0.7-1.9)         | 0.60         |
| <b>Place of residence</b>                 |                     |                |         |                       | <b>0.001</b> |
| Lomé                                      | 400/1289            | 1              |         | 1                     |              |
| Others                                    | 247/826             | 1.0 (0.8-1.2)  | 0.59    | 0.6 (0.5-0.8)         | 0.001        |
| <b>Alcohol consumption</b>                |                     |                |         |                       | <b>0.001</b> |
| No risky consumption                      | 257/1302            | 1              |         | 1                     |              |
| Hazardous/harmful drinking                | 390/813             | 3.8 (3.1-4.6)  | 0.001   | 2.6 (2.0-3.4)         | 0.001        |
| <b>Psychological distress</b>             |                     |                | 0.001   |                       | <b>0.01</b>  |
| Likely to not have psychological distress | 300/1278            | 1              |         | 1                     |              |

|                                                |          |                  |       |                  |              |
|------------------------------------------------|----------|------------------|-------|------------------|--------------|
| Likely to have mild psychological distress     | 150/426  | 1.8 (1.4-2.2)    | 0.001 | 1.5 (1.1-2.1)    | 0.01         |
| Likely to have moderate psychological distress | 128/275  | 2.8 (2.2-3.7)    | 0.001 | 2.0 (1.3-2.8)    | 0.001        |
| Likely to have severe psychological distress   | 69/136   | 3.4 (2.3-4.8)    | 0.001 | 1.3 (0.8-2.2)    | 0.30         |
| <b>HIV infection</b>                           |          |                  | 0.001 |                  | 0.34         |
| No                                             | 509/1677 | 1                |       | 1                |              |
| Yes                                            | 44/265   | 0.5 (0.3-0.6)    | 0.001 | 0.9 (0.6-1.3)    | 0.51         |
| Not completed                                  | 94/173   | 2.7 (2.0-3.8)    | 0.001 | 0.7 (0.5-1.2)    | 0.17         |
| <b>Key populations</b>                         |          |                  | 0.001 |                  | <b>0.001</b> |
| MSM                                            | 97/641   | 1                |       | 1                |              |
| FSW                                            | 116/937  | 0.8 (0.6-1.1)    | 0.12  | 0.6 (0.4-0.9)    | 0.01         |
| DU                                             | 434/537  | 23.6 (17.5-32.2) | 0.001 | 17.9 (12.4-26.4) | 0.001        |

aOR: adjusted odds ratio; OR: odds ratio; 95%CI: 95% confidence interval; DU: drug user;  
 FSW: female sex worker; MSM: men who have sex with men

1  
2  
3  
4  
5  
6  
7  
8  
9  
10  
11  
12  
13  
14  
15  
16  
17  
18  
19  
20  
21  
22  
23  
24  
25  
26  
27  
28  
29  
30  
31  
32  
33  
34  
35  
36  
37  
38  
39  
40  
41  
42  
43  
44  
45  
46

For peer review only



STROBE Statement—Checklist of items that should be included in reports of *cross-sectional studies*

|                              | Item No | Recommendation                                                                                                                                                                                               |     | Pages    |
|------------------------------|---------|--------------------------------------------------------------------------------------------------------------------------------------------------------------------------------------------------------------|-----|----------|
| <b>Title and abstract</b>    | 1       | (a) Indicate the study's design with a commonly used term in the title or the abstract                                                                                                                       | X   | 1        |
|                              |         | (b) Provide in the abstract an informative and balanced summary of what was done and what was found                                                                                                          | X   | 2        |
| <b>Introduction</b>          |         |                                                                                                                                                                                                              |     |          |
| Background/rationale         | 2       | Explain the scientific background and rationale for the investigation being reported                                                                                                                         | X   | 4        |
| Objectives                   | 3       | State specific objectives, including any prespecified hypotheses                                                                                                                                             | X   | 4        |
| <b>Methods</b>               |         |                                                                                                                                                                                                              |     |          |
| Study design                 | 4       | Present key elements of study design early in the paper                                                                                                                                                      | X   | 6        |
| Setting                      | 5       | Describe the setting, locations, and relevant dates, including periods of recruitment, exposure, follow-up, and data collection                                                                              | X   | 6        |
| Participants                 | 6       | (a) Give the eligibility criteria, and the sources and methods of selection of participants                                                                                                                  | X   | 6        |
| Variables                    | 7       | Clearly define all outcomes, exposures, predictors, potential confounders, and effect modifiers. Give diagnostic criteria, if applicable                                                                     | X   | 6-7      |
| Data sources/<br>measurement | 8*      | For each variable of interest, give sources of data and details of methods of assessment (measurement). Describe comparability of assessment methods if there is more than one group                         | X   | 6-7      |
| Bias                         | 9       | Describe any efforts to address potential sources of bias                                                                                                                                                    | X   | 6        |
| Study size                   | 10      | Explain how the study size was arrived at                                                                                                                                                                    | X   | 6        |
| Quantitative variables       | 11      | Explain how quantitative variables were handled in the analyses. If applicable, describe which groupings were chosen and why                                                                                 | X   | 7        |
| Statistical methods          | 12      | (a) Describe all statistical methods, including those used to control for confounding                                                                                                                        | X   | 7        |
|                              |         | (b) Describe any methods used to examine subgroups and interactions                                                                                                                                          | X   | 7        |
|                              |         | (c) Explain how missing data were addressed                                                                                                                                                                  | N/A |          |
|                              |         | (d) If applicable, describe analytical methods taking account of sampling strategy                                                                                                                           | N/A |          |
|                              |         | (e) Describe any sensitivity analyses                                                                                                                                                                        | N/A |          |
| <b>Results</b>               |         |                                                                                                                                                                                                              |     |          |
| Participants                 | 13*     | (a) Report numbers of individuals at each stage of study—eg numbers potentially eligible, examined for eligibility, confirmed eligible, included in the study, completing follow-up, and analysed            | X   | 8        |
|                              |         | (b) Give reasons for non-participation at each stage                                                                                                                                                         | N/A |          |
|                              |         | (c) Consider use of a flow diagram                                                                                                                                                                           | N/A |          |
| Descriptive data             | 14*     | (a) Give characteristics of study participants (eg demographic, clinical, social) and information on exposures and potential confounders                                                                     | X   | 8; 18-19 |
|                              |         | (b) Indicate number of participants with missing data for each variable of interest                                                                                                                          | N/A |          |
| Outcome data                 | 15*     | Report numbers of outcome events or summary measures                                                                                                                                                         | X   | 8        |
| Main results                 | 16      | (a) Give unadjusted estimates and, if applicable, confounder-adjusted estimates and their precision (eg, 95% confidence interval). Make clear which confounders were adjusted for and why they were included | X   | 8-9      |

|                          |    |                                                                                                                                                                            |     |       |
|--------------------------|----|----------------------------------------------------------------------------------------------------------------------------------------------------------------------------|-----|-------|
|                          |    | (b) Report category boundaries when continuous variables were categorized                                                                                                  | X   | 8-9   |
|                          |    | (c) If relevant, consider translating estimates of relative risk into absolute risk for a meaningful time period                                                           | N/A |       |
| Other analyses           | 17 | Report other analyses done—eg analyses of subgroups and interactions, and sensitivity analyses                                                                             | N/A |       |
| <b>Discussion</b>        |    |                                                                                                                                                                            |     |       |
| Key results              | 18 | Summarise key results with reference to study objectives                                                                                                                   | X   | 10    |
| Limitations              | 19 | Discuss limitations of the study, taking into account sources of potential bias or imprecision. Discuss both direction and magnitude of any potential bias                 | X   | 11    |
| Interpretation           | 20 | Give a cautious overall interpretation of results considering objectives, limitations, multiplicity of analyses, results from similar studies, and other relevant evidence | X   | 10    |
| Generalisability         | 21 | Discuss the generalisability (external validity) of the study results                                                                                                      | X   | 10-11 |
| <b>Other information</b> |    |                                                                                                                                                                            |     |       |
| Funding                  | 22 | Give the source of funding and the role of the funders for the present study and, if applicable, for the original study on which the present article is based              | X   | 13    |

\*Give information separately for exposed and unexposed groups.

**Note:** An Explanation and Elaboration article discusses each checklist item and gives methodological background and published examples of transparent reporting. The STROBE checklist is best used in conjunction with this article (freely available on the Web sites of PLoS Medicine at <http://www.plosmedicine.org/>, Annals of Internal Medicine at <http://www.annals.org/>, and Epidemiology at <http://www.epidem.com/>). Information on the STROBE Initiative is available at [www.strobe-statement.org](http://www.strobe-statement.org).
